# Supplementary material for: Metagenomic analysis of gut microbiome and resistome of diarrheal fecal samples from Kolkata, India, reveals the core and variable microbiota including signatures of microbial dark matter
Source: Gut Pathog. 2020 Jul 7;12:32. doi: 10.1186/s13099-020-00371-8 (PMC7339541; doi:10.1186/s13099-020-00371-8)
Supplement: Supplementary file 1 — Additional file 1. Hierarchical classification of taxonomic entities found from metagenomic sequencing in the study. [file 13099_2020_371_MOESM1_ESM.xlsx]

## Sheet: taxa_prop
Hierarchical taxonomic classification of OTUs obtained by 16S rDNA sequence homology
Superkingdom	Kingdom	Phylum	Class	Order	Family	Genus	Species
sk__Bacteria	Unclass_Bacteria	Unclass_Bacteria	Unclass_Bacteria	Unclass_Bacteria	Unclass_Bacteria	Unclass_Bacteria	Unclass_Bacteria
sk__Bacteria	k__Bacteria	p__Acidobacteria	c__Blastocatellia	Unclass_Blastocatellia	Unclass_Blastocatellia	Unclass_Blastocatellia	Unclass_Blastocatellia
sk__Bacteria	k__Bacteria	p__Acidobacteria	c__Blastocatellia	Unclass_Blastocatellia	Unclass_Blastocatellia	g__Blastocatella	Unclass_Blastocatella
sk__Bacteria	k__Bacteria	p__Acidobacteria	c__Solibacteres	o__Solibacterales	f__Solibacteraceae	Unclass_Solibacteraceae	Unclass_Solibacteraceae
sk__Bacteria	k__Bacteria	p__Actinobacteria	Unclass_Actinobacteria	Unclass_Actinobacteria	Unclass_Actinobacteria	Unclass_Actinobacteria	Unclass_Actinobacteria
sk__Bacteria	k__Bacteria	p__Actinobacteria	c__Acidimicrobiia	Unclass_Acidimicrobiia	Unclass_Acidimicrobiia	Unclass_Acidimicrobiia	Unclass_Acidimicrobiia
sk__Bacteria	k__Bacteria	p__Actinobacteria	c__Actinobacteria	Unclass_Actinobacteria	Unclass_Actinobacteria	Unclass_Actinobacteria	Unclass_Actinobacteria
sk__Bacteria	k__Bacteria	p__Actinobacteria	c__Actinobacteria	o__Actinomycetales	Unclass_Actinomycetales	Unclass_Actinomycetales	Unclass_Actinomycetales
sk__Bacteria	k__Bacteria	p__Actinobacteria	c__Actinobacteria	o__Actinomycetales	f__Actinomycetaceae	Unclass_Actinomycetaceae	Unclass_Actinomycetaceae
sk__Bacteria	k__Bacteria	p__Actinobacteria	c__Actinobacteria	o__Actinomycetales	f__Actinomycetaceae	g__Actinomyces	Unclass_Actinomyces
sk__Bacteria	k__Bacteria	p__Actinobacteria	c__Actinobacteria	o__Actinomycetales	f__Actinomycetaceae	g__Arcanobacterium	Unclass_Arcanobacterium
sk__Bacteria	k__Bacteria	p__Actinobacteria	c__Actinobacteria	o__Bifidobacteriales	Unclass_Bifidobacteriales	Unclass_Bifidobacteriales	Unclass_Bifidobacteriales
sk__Bacteria	k__Bacteria	p__Actinobacteria	c__Actinobacteria	o__Bifidobacteriales	f__Bifidobacteriaceae	Unclass_Bifidobacteriaceae	Unclass_Bifidobacteriaceae
sk__Bacteria	k__Bacteria	p__Actinobacteria	c__Actinobacteria	o__Bifidobacteriales	f__Bifidobacteriaceae	g__Bifidobacterium	Unclass_Bifidobacterium
sk__Bacteria	k__Bacteria	p__Actinobacteria	c__Actinobacteria	o__Corynebacteriales	Unclass_Corynebacteriales	Unclass_Corynebacteriales	Unclass_Corynebacteriales
sk__Bacteria	k__Bacteria	p__Actinobacteria	c__Actinobacteria	o__Corynebacteriales	f__Corynebacteriaceae	Unclass_Corynebacteriaceae	Unclass_Corynebacteriaceae
sk__Bacteria	k__Bacteria	p__Actinobacteria	c__Actinobacteria	o__Corynebacteriales	f__Corynebacteriaceae	g__Corynebacterium	Unclass_Corynebacterium
sk__Bacteria	k__Bacteria	p__Actinobacteria	c__Actinobacteria	o__Corynebacteriales	f__Corynebacteriaceae	g__Turicella	Unclass_Turicella
sk__Bacteria	k__Bacteria	p__Actinobacteria	c__Actinobacteria	o__Corynebacteriales	f__Dietziaceae	g__Dietzia	Unclass_Dietzia
sk__Bacteria	k__Bacteria	p__Actinobacteria	c__Actinobacteria	o__Corynebacteriales	f__Gordoniaceae	Unclass_Gordoniaceae	Unclass_Gordoniaceae
sk__Bacteria	k__Bacteria	p__Actinobacteria	c__Actinobacteria	o__Corynebacteriales	f__Nocardiaceae	Unclass_Nocardiaceae	Unclass_Nocardiaceae
sk__Bacteria	k__Bacteria	p__Actinobacteria	c__Actinobacteria	o__Corynebacteriales	f__Nocardiaceae	g__Rhodococcus	Unclass_Rhodococcus
sk__Bacteria	k__Bacteria	p__Actinobacteria	c__Actinobacteria	o__Micrococcales	Unclass_Micrococcales	Unclass_Micrococcales	Unclass_Micrococcales
sk__Bacteria	k__Bacteria	p__Actinobacteria	c__Actinobacteria	o__Micrococcales	f__Brevibacteriaceae	g__Brevibacterium	Unclass_Brevibacterium
sk__Bacteria	k__Bacteria	p__Actinobacteria	c__Actinobacteria	o__Micrococcales	f__Dermacoccaceae	g__Kytococcus	Unclass_Kytococcus
sk__Bacteria	k__Bacteria	p__Actinobacteria	c__Actinobacteria	o__Micrococcales	f__Dermatophilaceae	Unclass_Dermatophilaceae	Unclass_Dermatophilaceae
sk__Bacteria	k__Bacteria	p__Actinobacteria	c__Actinobacteria	o__Micrococcales	f__Intrasporangiaceae	Unclass_Intrasporangiaceae	Unclass_Intrasporangiaceae
sk__Bacteria	k__Bacteria	p__Actinobacteria	c__Actinobacteria	o__Micrococcales	f__Microbacteriaceae	Unclass_Microbacteriaceae	Unclass_Microbacteriaceae
sk__Bacteria	k__Bacteria	p__Actinobacteria	c__Actinobacteria	o__Micrococcales	f__Microbacteriaceae	g__Candidatus_Planktoluna	Unclass_Candidatus_Planktoluna
sk__Bacteria	k__Bacteria	p__Actinobacteria	c__Actinobacteria	o__Micrococcales	f__Microbacteriaceae	g__Microbacterium	Unclass_Microbacterium
sk__Bacteria	k__Bacteria	p__Actinobacteria	c__Actinobacteria	o__Micrococcales	f__Micrococcaceae	Unclass_Micrococcaceae	Unclass_Micrococcaceae
sk__Bacteria	k__Bacteria	p__Actinobacteria	c__Actinobacteria	o__Micrococcales	f__Micrococcaceae	g__Micrococcus	Unclass_Micrococcus
sk__Bacteria	k__Bacteria	p__Actinobacteria	c__Actinobacteria	o__Micrococcales	f__Micrococcaceae	g__Rothia	Unclass_Rothia
sk__Bacteria	k__Bacteria	p__Actinobacteria	c__Actinobacteria	o__Propionibacteriales	Unclass_Propionibacteriales	Unclass_Propionibacteriales	Unclass_Propionibacteriales
sk__Bacteria	k__Bacteria	p__Actinobacteria	c__Actinobacteria	o__Propionibacteriales	f__Nocardioidaceae	g__Friedmanniella	Unclass_Friedmanniella
sk__Bacteria	k__Bacteria	p__Actinobacteria	c__Actinobacteria	o__Propionibacteriales	f__Nocardioidaceae	g__Marmoricola	Unclass_Marmoricola
sk__Bacteria	k__Bacteria	p__Actinobacteria	c__Actinobacteria	o__Propionibacteriales	f__Propionibacteriaceae	Unclass_Propionibacteriaceae	Unclass_Propionibacteriaceae
sk__Bacteria	k__Bacteria	p__Actinobacteria	c__Actinobacteria	o__Propionibacteriales	f__Propionibacteriaceae	g__Cutibacterium	Unclass_Cutibacterium
sk__Bacteria	k__Bacteria	p__Actinobacteria	c__Actinobacteria	o__Pseudonocardiales	Unclass_Pseudonocardiales	Unclass_Pseudonocardiales	Unclass_Pseudonocardiales
sk__Bacteria	k__Bacteria	p__Actinobacteria	c__Actinobacteria	o__Pseudonocardiales	f__Pseudonocardiaceae	Unclass_Pseudonocardiaceae	Unclass_Pseudonocardiaceae
sk__Bacteria	k__Bacteria	p__Actinobacteria	c__Actinobacteria	o__Streptomycetales	Unclass_Streptomycetales	Unclass_Streptomycetales	Unclass_Streptomycetales
sk__Bacteria	k__Bacteria	p__Actinobacteria	c__Actinobacteria	o__Streptomycetales	f__Streptomycetaceae	Unclass_Streptomycetaceae	Unclass_Streptomycetaceae
sk__Bacteria	k__Bacteria	p__Actinobacteria	c__Actinobacteria	o__Streptomycetales	f__Streptomycetaceae	g__Streptomyces	Unclass_Streptomyces
sk__Bacteria	k__Bacteria	p__Actinobacteria	c__Actinobacteria	o__Streptomycetales	f__Streptomycetaceae	g__Streptomyces	s__Streptomyces_sp._Q1
sk__Bacteria	k__Bacteria	p__Actinobacteria	c__Coriobacteriia	Unclass_Coriobacteriia	Unclass_Coriobacteriia	Unclass_Coriobacteriia	Unclass_Coriobacteriia
sk__Bacteria	k__Bacteria	p__Actinobacteria	c__Coriobacteriia	o__Coriobacteriales	f__Atopobiaceae	Unclass_Atopobiaceae	Unclass_Atopobiaceae
sk__Bacteria	k__Bacteria	p__Actinobacteria	c__Coriobacteriia	o__Coriobacteriales	f__Atopobiaceae	g__Libanicoccus	Unclass_Libanicoccus
sk__Bacteria	k__Bacteria	p__Actinobacteria	c__Coriobacteriia	o__Coriobacteriales	f__Coriobacteriaceae	Unclass_Coriobacteriaceae	Unclass_Coriobacteriaceae
sk__Bacteria	k__Bacteria	p__Actinobacteria	c__Coriobacteriia	o__Eggerthellales	f__Eggerthellaceae	Unclass_Eggerthellaceae	Unclass_Eggerthellaceae
sk__Bacteria	k__Bacteria	p__Actinobacteria	c__Coriobacteriia	o__Eggerthellales	f__Eggerthellaceae	g__Enterorhabdus	Unclass_Enterorhabdus
sk__Bacteria	k__Bacteria	p__Actinobacteria	c__Coriobacteriia	o__Eggerthellales	f__Eggerthellaceae	g__Slackia	Unclass_Slackia
sk__Bacteria	k__Bacteria	p__Actinobacteria	c__Rubrobacteria	o__Gaiellales	Unclass_Gaiellales	Unclass_Gaiellales	Unclass_Gaiellales
sk__Bacteria	k__Bacteria	p__Armatimonadetes	c__Armatimonadia	o__Armatimonadales	Unclass_Armatimonadales	Unclass_Armatimonadales	Unclass_Armatimonadales
sk__Bacteria	k__Bacteria	p__Bacteroidetes	Unclass_Bacteroidetes	Unclass_Bacteroidetes	Unclass_Bacteroidetes	Unclass_Bacteroidetes	Unclass_Bacteroidetes
sk__Bacteria	k__Bacteria	p__Bacteroidetes	c__Bacteroidia	o__Bacteroidales	Unclass_Bacteroidales	Unclass_Bacteroidales	Unclass_Bacteroidales
sk__Bacteria	k__Bacteria	p__Bacteroidetes	c__Bacteroidia	o__Bacteroidales	f__Bacteroidaceae	Unclass_Bacteroidaceae	Unclass_Bacteroidaceae
sk__Bacteria	k__Bacteria	p__Bacteroidetes	c__Bacteroidia	o__Bacteroidales	f__Bacteroidaceae	g__Bacteroides	Unclass_Bacteroides
sk__Bacteria	k__Bacteria	p__Bacteroidetes	c__Bacteroidia	o__Bacteroidales	f__Dysgonamonadaceae	Unclass_Dysgonamonadaceae	Unclass_Dysgonamonadaceae
sk__Bacteria	k__Bacteria	p__Bacteroidetes	c__Bacteroidia	o__Bacteroidales	f__Lentimicrobiaceae	Unclass_Lentimicrobiaceae	Unclass_Lentimicrobiaceae
sk__Bacteria	k__Bacteria	p__Bacteroidetes	c__Bacteroidia	o__Bacteroidales	f__Muribaculaceae	Unclass_Muribaculaceae	Unclass_Muribaculaceae
sk__Bacteria	k__Bacteria	p__Bacteroidetes	c__Bacteroidia	o__Bacteroidales	f__Odoribacteraceae	g__Butyricimonas	Unclass_Butyricimonas
sk__Bacteria	k__Bacteria	p__Bacteroidetes	c__Bacteroidia	o__Bacteroidales	f__Odoribacteraceae	g__Odoribacter	Unclass_Odoribacter
sk__Bacteria	k__Bacteria	p__Bacteroidetes	c__Bacteroidia	o__Bacteroidales	f__Paludibacteraceae	Unclass_Paludibacteraceae	Unclass_Paludibacteraceae
sk__Bacteria	k__Bacteria	p__Bacteroidetes	c__Bacteroidia	o__Bacteroidales	f__Porphyromonadaceae	g__Porphyromonas	Unclass_Porphyromonas
sk__Bacteria	k__Bacteria	p__Bacteroidetes	c__Bacteroidia	o__Bacteroidales	f__Prevotellaceae	Unclass_Prevotellaceae	Unclass_Prevotellaceae
sk__Bacteria	k__Bacteria	p__Bacteroidetes	c__Bacteroidia	o__Bacteroidales	f__Prevotellaceae	g__Alloprevotella	Unclass_Alloprevotella
sk__Bacteria	k__Bacteria	p__Bacteroidetes	c__Bacteroidia	o__Bacteroidales	f__Prevotellaceae	g__Prevotella	Unclass_Prevotella
sk__Bacteria	k__Bacteria	p__Bacteroidetes	c__Bacteroidia	o__Bacteroidales	f__Prevotellaceae	g__Prevotella	s__Prevotella_enoeca
sk__Bacteria	k__Bacteria	p__Bacteroidetes	c__Bacteroidia	o__Bacteroidales	f__Rikenellaceae	Unclass_Rikenellaceae	Unclass_Rikenellaceae
sk__Bacteria	k__Bacteria	p__Bacteroidetes	c__Bacteroidia	o__Bacteroidales	f__Tannerellaceae	g__Parabacteroides	Unclass_Parabacteroides
sk__Bacteria	k__Bacteria	p__Bacteroidetes	c__Cytophagia	o__Cytophagales	f__Cytophagaceae	g__Flectobacillus	Unclass_Flectobacillus
sk__Bacteria	k__Bacteria	p__Bacteroidetes	c__Cytophagia	o__Cytophagales	f__Microscillaceae	Unclass_Microscillaceae	Unclass_Microscillaceae
sk__Bacteria	k__Bacteria	p__Bacteroidetes	c__Flavobacteriia	o__Flavobacteriales	f__Flavobacteriaceae	Unclass_Flavobacteriaceae	Unclass_Flavobacteriaceae
sk__Bacteria	k__Bacteria	p__Bacteroidetes	c__Flavobacteriia	o__Flavobacteriales	f__Flavobacteriaceae	g__Bergeyella	Unclass_Bergeyella
sk__Bacteria	k__Bacteria	p__Bacteroidetes	c__Flavobacteriia	o__Flavobacteriales	f__Flavobacteriaceae	g__Capnocytophaga	Unclass_Capnocytophaga
sk__Bacteria	k__Bacteria	p__Bacteroidetes	c__Flavobacteriia	o__Flavobacteriales	f__Flavobacteriaceae	g__Chryseobacterium	Unclass_Chryseobacterium
sk__Bacteria	k__Bacteria	p__Calditrichaeota	Unclass_Calditrichaeota	Unclass_Calditrichaeota	Unclass_Calditrichaeota	Unclass_Calditrichaeota	Unclass_Calditrichaeota
sk__Bacteria	k__Bacteria	p__Calditrichaeota	c__Calditrichae	o__Calditrichales	f__Calditrichaceae	Unclass_Calditrichaceae	Unclass_Calditrichaceae
sk__Bacteria	k__Bacteria	p__Chloroflexi	c__Anaerolineae	o__Anaerolineales	f__Anaerolineaceae	Unclass_Anaerolineaceae	Unclass_Anaerolineaceae
sk__Bacteria	k__Bacteria	p__Deinococcus-Thermus	c__Deinococci	o__Deinococcales	f__Deinococcaceae	g__Deinococcus	Unclass_Deinococcus
sk__Bacteria	k__Bacteria	p__Deinococcus-Thermus	c__Deinococci	o__Deinococcales	f__Deinococcaceae	g__Deinococcus	s__Deinococcus_geothermalis
sk__Bacteria	k__Bacteria	p__Firmicutes	Unclass_Firmicutes	Unclass_Firmicutes	Unclass_Firmicutes	Unclass_Firmicutes	Unclass_Firmicutes
sk__Bacteria	k__Bacteria	p__Firmicutes	c__Bacilli	Unclass_Bacilli	Unclass_Bacilli	Unclass_Bacilli	Unclass_Bacilli
sk__Bacteria	k__Bacteria	p__Firmicutes	c__Bacilli	o__Bacillales	Unclass_Bacillales	Unclass_Bacillales	Unclass_Bacillales
sk__Bacteria	k__Bacteria	p__Firmicutes	c__Bacilli	o__Bacillales	Unclass_Bacillales	g__Exiguobacterium	Unclass_Exiguobacterium
sk__Bacteria	k__Bacteria	p__Firmicutes	c__Bacilli	o__Bacillales	Unclass_Bacillales	g__Gemella	Unclass_Gemella
sk__Bacteria	k__Bacteria	p__Firmicutes	c__Bacilli	o__Bacillales	f__Alicyclobacillaceae	g__Effusibacillus	Unclass_Effusibacillus
sk__Bacteria	k__Bacteria	p__Firmicutes	c__Bacilli	o__Bacillales	f__Bacillaceae	Unclass_Bacillaceae	Unclass_Bacillaceae
sk__Bacteria	k__Bacteria	p__Firmicutes	c__Bacilli	o__Bacillales	f__Bacillaceae	g__Bacillus	Unclass_Bacillus
sk__Bacteria	k__Bacteria	p__Firmicutes	c__Bacilli	o__Bacillales	f__Planococcaceae	Unclass_Planococcaceae	Unclass_Planococcaceae
sk__Bacteria	k__Bacteria	p__Firmicutes	c__Bacilli	o__Bacillales	f__Planococcaceae	g__Planococcus	Unclass_Planococcus
sk__Bacteria	k__Bacteria	p__Firmicutes	c__Bacilli	o__Bacillales	f__Staphylococcaceae	Unclass_Staphylococcaceae	Unclass_Staphylococcaceae
sk__Bacteria	k__Bacteria	p__Firmicutes	c__Bacilli	o__Bacillales	f__Staphylococcaceae	g__Staphylococcus	Unclass_Staphylococcus
sk__Bacteria	k__Bacteria	p__Firmicutes	c__Bacilli	o__Lactobacillales	Unclass_Lactobacillales	Unclass_Lactobacillales	Unclass_Lactobacillales
sk__Bacteria	k__Bacteria	p__Firmicutes	c__Bacilli	o__Lactobacillales	f__Aerococcaceae	Unclass_Aerococcaceae	Unclass_Aerococcaceae
sk__Bacteria	k__Bacteria	p__Firmicutes	c__Bacilli	o__Lactobacillales	f__Aerococcaceae	g__Aerococcus	Unclass_Aerococcus
sk__Bacteria	k__Bacteria	p__Firmicutes	c__Bacilli	o__Lactobacillales	f__Carnobacteriaceae	Unclass_Carnobacteriaceae	Unclass_Carnobacteriaceae
sk__Bacteria	k__Bacteria	p__Firmicutes	c__Bacilli	o__Lactobacillales	f__Carnobacteriaceae	g__Dolosigranulum	Unclass_Dolosigranulum
sk__Bacteria	k__Bacteria	p__Firmicutes	c__Bacilli	o__Lactobacillales	f__Carnobacteriaceae	g__Granulicatella	Unclass_Granulicatella
sk__Bacteria	k__Bacteria	p__Firmicutes	c__Bacilli	o__Lactobacillales	f__Enterococcaceae	Unclass_Enterococcaceae	Unclass_Enterococcaceae
sk__Bacteria	k__Bacteria	p__Firmicutes	c__Bacilli	o__Lactobacillales	f__Enterococcaceae	g__Enterococcus	Unclass_Enterococcus
sk__Bacteria	k__Bacteria	p__Firmicutes	c__Bacilli	o__Lactobacillales	f__Lactobacillaceae	Unclass_Lactobacillaceae	Unclass_Lactobacillaceae
sk__Bacteria	k__Bacteria	p__Firmicutes	c__Bacilli	o__Lactobacillales	f__Lactobacillaceae	g__Lactobacillus	Unclass_Lactobacillus
sk__Bacteria	k__Bacteria	p__Firmicutes	c__Bacilli	o__Lactobacillales	f__Leuconostocaceae	Unclass_Leuconostocaceae	Unclass_Leuconostocaceae
sk__Bacteria	k__Bacteria	p__Firmicutes	c__Bacilli	o__Lactobacillales	f__Streptococcaceae	Unclass_Streptococcaceae	Unclass_Streptococcaceae
sk__Bacteria	k__Bacteria	p__Firmicutes	c__Bacilli	o__Lactobacillales	f__Streptococcaceae	g__Lactococcus	Unclass_Lactococcus
sk__Bacteria	k__Bacteria	p__Firmicutes	c__Bacilli	o__Lactobacillales	f__Streptococcaceae	g__Streptococcus	Unclass_Streptococcus
sk__Bacteria	k__Bacteria	p__Firmicutes	c__Bacilli	o__Lactobacillales	f__Streptococcaceae	g__Streptococcus	s__Streptococcus_agalactiae
sk__Bacteria	k__Bacteria	p__Firmicutes	c__Bacilli	o__Lactobacillales	f__Streptococcaceae	g__Streptococcus	s__Streptococcus_parasanguinis
sk__Bacteria	k__Bacteria	p__Firmicutes	c__Clostridia	Unclass_Clostridia	Unclass_Clostridia	Unclass_Clostridia	Unclass_Clostridia
sk__Bacteria	k__Bacteria	p__Firmicutes	c__Clostridia	o__Clostridiales	Unclass_Clostridiales	Unclass_Clostridiales	Unclass_Clostridiales
sk__Bacteria	k__Bacteria	p__Firmicutes	c__Clostridia	o__Clostridiales	f__Caldicoprobacteraceae	Unclass_Caldicoprobacteraceae	Unclass_Caldicoprobacteraceae
sk__Bacteria	k__Bacteria	p__Firmicutes	c__Clostridia	o__Clostridiales	f__Christensenellaceae	Unclass_Christensenellaceae	Unclass_Christensenellaceae
sk__Bacteria	k__Bacteria	p__Firmicutes	c__Clostridia	o__Clostridiales	f__Clostridiaceae	Unclass_Clostridiaceae	Unclass_Clostridiaceae
sk__Bacteria	k__Bacteria	p__Firmicutes	c__Clostridia	o__Clostridiales	f__Clostridiaceae	g__Clostridium	Unclass_Clostridium
sk__Bacteria	k__Bacteria	p__Firmicutes	c__Clostridia	o__Clostridiales	f__Clostridiaceae	g__Lutispora	Unclass_Lutispora
sk__Bacteria	k__Bacteria	p__Firmicutes	c__Clostridia	o__Clostridiales	f__Clostridiales_Family_XII._Incertae_Sedis	Unclass_Clostridiales_Family_XII._Incertae_Sedis	Unclass_Clostridiales_Family_XII._Incertae_Sedis
sk__Bacteria	k__Bacteria	p__Firmicutes	c__Clostridia	o__Clostridiales	f__Clostridiales_Family_XII._Incertae_Sedis	g__Fusibacter	Unclass_Fusibacter
sk__Bacteria	k__Bacteria	p__Firmicutes	c__Clostridia	o__Clostridiales	f__Clostridiales_Family_XIII._Incertae_Sedis	g__Mogibacterium	Unclass_Mogibacterium
sk__Bacteria	k__Bacteria	p__Firmicutes	c__Clostridia	o__Clostridiales	f__Eubacteriaceae	Unclass_Eubacteriaceae	Unclass_Eubacteriaceae
sk__Bacteria	k__Bacteria	p__Firmicutes	c__Clostridia	o__Clostridiales	f__Eubacteriaceae	g__Alkalibacter	Unclass_Alkalibacter
sk__Bacteria	k__Bacteria	p__Firmicutes	c__Clostridia	o__Clostridiales	f__Lachnospiraceae	Unclass_Lachnospiraceae	Unclass_Lachnospiraceae
sk__Bacteria	k__Bacteria	p__Firmicutes	c__Clostridia	o__Clostridiales	f__Lachnospiraceae	g__Agathobacter	Unclass_Agathobacter
sk__Bacteria	k__Bacteria	p__Firmicutes	c__Clostridia	o__Clostridiales	f__Lachnospiraceae	g__Anaerosporobacter	Unclass_Anaerosporobacter
sk__Bacteria	k__Bacteria	p__Firmicutes	c__Clostridia	o__Clostridiales	f__Lachnospiraceae	g__Anaerostipes	Unclass_Anaerostipes
sk__Bacteria	k__Bacteria	p__Firmicutes	c__Clostridia	o__Clostridiales	f__Lachnospiraceae	g__Blautia	Unclass_Blautia
sk__Bacteria	k__Bacteria	p__Firmicutes	c__Clostridia	o__Clostridiales	f__Lachnospiraceae	g__Blautia	s__Blautia_massiliensis
sk__Bacteria	k__Bacteria	p__Firmicutes	c__Clostridia	o__Clostridiales	f__Lachnospiraceae	g__Catonella	Unclass_Catonella
sk__Bacteria	k__Bacteria	p__Firmicutes	c__Clostridia	o__Clostridiales	f__Lachnospiraceae	g__Dorea	Unclass_Dorea
sk__Bacteria	k__Bacteria	p__Firmicutes	c__Clostridia	o__Clostridiales	f__Lachnospiraceae	g__Lachnoclostridium	Unclass_Lachnoclostridium
sk__Bacteria	k__Bacteria	p__Firmicutes	c__Clostridia	o__Clostridiales	f__Lachnospiraceae	g__Roseburia	Unclass_Roseburia
sk__Bacteria	k__Bacteria	p__Firmicutes	c__Clostridia	o__Clostridiales	f__Lachnospiraceae	g__Roseburia	s__Roseburia_hominis
sk__Bacteria	k__Bacteria	p__Firmicutes	c__Clostridia	o__Clostridiales	f__Lachnospiraceae	g__Shuttleworthia	Unclass_Shuttleworthia
sk__Bacteria	k__Bacteria	p__Firmicutes	c__Clostridia	o__Clostridiales	f__Lachnospiraceae	g__Stomatobaculum	Unclass_Stomatobaculum
sk__Bacteria	k__Bacteria	p__Firmicutes	c__Clostridia	o__Clostridiales	f__Oscillospiraceae	g__Oscillibacter	Unclass_Oscillibacter
sk__Bacteria	k__Bacteria	p__Firmicutes	c__Clostridia	o__Clostridiales	f__Peptococcaceae	g__Desulfotomaculum	Unclass_Desulfotomaculum
sk__Bacteria	k__Bacteria	p__Firmicutes	c__Clostridia	o__Clostridiales	f__Peptostreptococcaceae	Unclass_Peptostreptococcaceae	Unclass_Peptostreptococcaceae
sk__Bacteria	k__Bacteria	p__Firmicutes	c__Clostridia	o__Clostridiales	f__Peptostreptococcaceae	g__Peptostreptococcus	Unclass_Peptostreptococcus
sk__Bacteria	k__Bacteria	p__Firmicutes	c__Clostridia	o__Clostridiales	f__Ruminococcaceae	Unclass_Ruminococcaceae	Unclass_Ruminococcaceae
sk__Bacteria	k__Bacteria	p__Firmicutes	c__Clostridia	o__Clostridiales	f__Ruminococcaceae	g__Faecalibacterium	Unclass_Faecalibacterium
sk__Bacteria	k__Bacteria	p__Firmicutes	c__Clostridia	o__Clostridiales	f__Ruminococcaceae	g__Fastidiosipila	Unclass_Fastidiosipila
sk__Bacteria	k__Bacteria	p__Firmicutes	c__Clostridia	o__Clostridiales	f__Ruminococcaceae	g__Ruminiclostridium	Unclass_Ruminiclostridium
sk__Bacteria	k__Bacteria	p__Firmicutes	c__Clostridia	o__Clostridiales	f__Ruminococcaceae	g__Ruminococcus	Unclass_Ruminococcus
sk__Bacteria	k__Bacteria	p__Firmicutes	c__Clostridia	o__Clostridiales	f__Ruminococcaceae	g__Ruminococcus	s__Ruminococcus_sp.
sk__Bacteria	k__Bacteria	p__Firmicutes	c__Clostridia	o__Clostridiales	f__Ruminococcaceae	g__Subdoligranulum	Unclass_Subdoligranulum
sk__Bacteria	k__Bacteria	p__Firmicutes	c__Clostridia	o__Clostridiales	f__Syntrophomonadaceae	g__Dethiobacter	Unclass_Dethiobacter
sk__Bacteria	k__Bacteria	p__Firmicutes	c__Erysipelotrichia	o__Erysipelotrichales	Unclass_Erysipelotrichales	Unclass_Erysipelotrichales	Unclass_Erysipelotrichales
sk__Bacteria	k__Bacteria	p__Firmicutes	c__Erysipelotrichia	o__Erysipelotrichales	f__Erysipelotrichaceae	Unclass_Erysipelotrichaceae	Unclass_Erysipelotrichaceae
sk__Bacteria	k__Bacteria	p__Firmicutes	c__Erysipelotrichia	o__Erysipelotrichales	f__Erysipelotrichaceae	g__Catenibacterium	Unclass_Catenibacterium
sk__Bacteria	k__Bacteria	p__Firmicutes	c__Erysipelotrichia	o__Erysipelotrichales	f__Erysipelotrichaceae	g__Holdemanella	Unclass_Holdemanella
sk__Bacteria	k__Bacteria	p__Firmicutes	c__Erysipelotrichia	o__Erysipelotrichales	f__Erysipelotrichaceae	g__Solobacterium	Unclass_Solobacterium
sk__Bacteria	k__Bacteria	p__Firmicutes	c__Erysipelotrichia	o__Erysipelotrichales	f__Erysipelotrichaceae	g__Turicibacter	Unclass_Turicibacter
sk__Bacteria	k__Bacteria	p__Firmicutes	c__Negativicutes	Unclass_Negativicutes	Unclass_Negativicutes	Unclass_Negativicutes	Unclass_Negativicutes
sk__Bacteria	k__Bacteria	p__Firmicutes	c__Negativicutes	o__Acidaminococcales	Unclass_Acidaminococcales	Unclass_Acidaminococcales	Unclass_Acidaminococcales
sk__Bacteria	k__Bacteria	p__Firmicutes	c__Negativicutes	o__Acidaminococcales	f__Acidaminococcaceae	Unclass_Acidaminococcaceae	Unclass_Acidaminococcaceae
sk__Bacteria	k__Bacteria	p__Firmicutes	c__Negativicutes	o__Acidaminococcales	f__Acidaminococcaceae	g__Phascolarctobacterium	Unclass_Phascolarctobacterium
sk__Bacteria	k__Bacteria	p__Firmicutes	c__Negativicutes	o__Selenomonadales	f__Selenomonadaceae	g__Megamonas	Unclass_Megamonas
sk__Bacteria	k__Bacteria	p__Firmicutes	c__Negativicutes	o__Veillonellales	Unclass_Veillonellales	Unclass_Veillonellales	Unclass_Veillonellales
sk__Bacteria	k__Bacteria	p__Firmicutes	c__Negativicutes	o__Veillonellales	f__Veillonellaceae	Unclass_Veillonellaceae	Unclass_Veillonellaceae
sk__Bacteria	k__Bacteria	p__Firmicutes	c__Negativicutes	o__Veillonellales	f__Veillonellaceae	g__Dialister	Unclass_Dialister
sk__Bacteria	k__Bacteria	p__Firmicutes	c__Negativicutes	o__Veillonellales	f__Veillonellaceae	g__Veillonella	Unclass_Veillonella
sk__Bacteria	k__Bacteria	p__Firmicutes	c__Tissierellia	o__Tissierellales	Unclass_Tissierellales	Unclass_Tissierellales	Unclass_Tissierellales
sk__Bacteria	k__Bacteria	p__Firmicutes	c__Tissierellia	o__Tissierellales	f__Peptoniphilaceae	Unclass_Peptoniphilaceae	Unclass_Peptoniphilaceae
sk__Bacteria	k__Bacteria	p__Firmicutes	c__Tissierellia	o__Tissierellales	f__Peptoniphilaceae	g__Anaerococcus	Unclass_Anaerococcus
sk__Bacteria	k__Bacteria	p__Firmicutes	c__Tissierellia	o__Tissierellales	f__Peptoniphilaceae	g__Peptoniphilus	Unclass_Peptoniphilus
sk__Bacteria	k__Bacteria	p__Fusobacteria	Unclass_Fusobacteria	Unclass_Fusobacteria	Unclass_Fusobacteria	Unclass_Fusobacteria	Unclass_Fusobacteria
sk__Bacteria	k__Bacteria	p__Fusobacteria	c__Fusobacteriia	o__Fusobacteriales	f__Fusobacteriaceae	g__Fusobacterium	Unclass_Fusobacterium
sk__Bacteria	k__Bacteria	p__Fusobacteria	c__Fusobacteriia	o__Fusobacteriales	f__Leptotrichiaceae	Unclass_Leptotrichiaceae	Unclass_Leptotrichiaceae
sk__Bacteria	k__Bacteria	p__Fusobacteria	c__Fusobacteriia	o__Fusobacteriales	f__Leptotrichiaceae	g__Leptotrichia	Unclass_Leptotrichia
sk__Bacteria	k__Bacteria	p__Fusobacteria	c__Fusobacteriia	o__Fusobacteriales	f__Leptotrichiaceae	g__Streptobacillus	Unclass_Streptobacillus
sk__Bacteria	k__Bacteria	p__Fusobacteria	c__Fusobacteriia	o__Fusobacteriales	f__Leptotrichiaceae	g__Streptobacillus	s__Streptobacillus_hongkongensis
sk__Bacteria	k__Bacteria	p__Planctomycetes	Unclass_Planctomycetes	Unclass_Planctomycetes	Unclass_Planctomycetes	Unclass_Planctomycetes	Unclass_Planctomycetes
sk__Bacteria	k__Bacteria	p__Proteobacteria	Unclass_Proteobacteria	Unclass_Proteobacteria	Unclass_Proteobacteria	Unclass_Proteobacteria	Unclass_Proteobacteria
sk__Bacteria	k__Bacteria	p__Proteobacteria	c__Alphaproteobacteria	Unclass_Alphaproteobacteria	Unclass_Alphaproteobacteria	Unclass_Alphaproteobacteria	Unclass_Alphaproteobacteria
sk__Bacteria	k__Bacteria	p__Proteobacteria	c__Alphaproteobacteria	o__Caulobacterales	f__Caulobacteraceae	Unclass_Caulobacteraceae	Unclass_Caulobacteraceae
sk__Bacteria	k__Bacteria	p__Proteobacteria	c__Alphaproteobacteria	o__Caulobacterales	f__Caulobacteraceae	g__Brevundimonas	Unclass_Brevundimonas
sk__Bacteria	k__Bacteria	p__Proteobacteria	c__Alphaproteobacteria	o__Rhizobiales	Unclass_Rhizobiales	Unclass_Rhizobiales	Unclass_Rhizobiales
sk__Bacteria	k__Bacteria	p__Proteobacteria	c__Alphaproteobacteria	o__Rhizobiales	f__Methylobacteriaceae	Unclass_Methylobacteriaceae	Unclass_Methylobacteriaceae
sk__Bacteria	k__Bacteria	p__Proteobacteria	c__Alphaproteobacteria	o__Rhizobiales	f__Methylobacteriaceae	g__Methylobacterium	Unclass_Methylobacterium
sk__Bacteria	k__Bacteria	p__Proteobacteria	c__Alphaproteobacteria	o__Rhodobacterales	f__Hyphomonadaceae	Unclass_Hyphomonadaceae	Unclass_Hyphomonadaceae
sk__Bacteria	k__Bacteria	p__Proteobacteria	c__Alphaproteobacteria	o__Rhodobacterales	f__Rhodobacteraceae	Unclass_Rhodobacteraceae	Unclass_Rhodobacteraceae
sk__Bacteria	k__Bacteria	p__Proteobacteria	c__Alphaproteobacteria	o__Rhodobacterales	f__Rhodobacteraceae	g__Paracoccus	Unclass_Paracoccus
sk__Bacteria	k__Bacteria	p__Proteobacteria	c__Alphaproteobacteria	o__Rhodospirillales	Unclass_Rhodospirillales	Unclass_Rhodospirillales	Unclass_Rhodospirillales
sk__Bacteria	k__Bacteria	p__Proteobacteria	c__Alphaproteobacteria	o__Rickettsiales	Unclass_Rickettsiales	Unclass_Rickettsiales	Unclass_Rickettsiales
sk__Bacteria	k__Bacteria	p__Proteobacteria	c__Alphaproteobacteria	o__Sphingomonadales	Unclass_Sphingomonadales	Unclass_Sphingomonadales	Unclass_Sphingomonadales
sk__Bacteria	k__Bacteria	p__Proteobacteria	c__Alphaproteobacteria	o__Sphingomonadales	f__Erythrobacteraceae	Unclass_Erythrobacteraceae	Unclass_Erythrobacteraceae
sk__Bacteria	k__Bacteria	p__Proteobacteria	c__Alphaproteobacteria	o__Sphingomonadales	f__Erythrobacteraceae	g__Altererythrobacter	Unclass_Altererythrobacter
sk__Bacteria	k__Bacteria	p__Proteobacteria	c__Alphaproteobacteria	o__Sphingomonadales	f__Sphingomonadaceae	Unclass_Sphingomonadaceae	Unclass_Sphingomonadaceae
sk__Bacteria	k__Bacteria	p__Proteobacteria	c__Alphaproteobacteria	o__Sphingomonadales	f__Sphingomonadaceae	g__Novosphingobium	Unclass_Novosphingobium
sk__Bacteria	k__Bacteria	p__Proteobacteria	c__Alphaproteobacteria	o__Sphingomonadales	f__Sphingomonadaceae	g__Sphingomonas	Unclass_Sphingomonas
sk__Bacteria	k__Bacteria	p__Proteobacteria	c__Betaproteobacteria	Unclass_Betaproteobacteria	Unclass_Betaproteobacteria	Unclass_Betaproteobacteria	Unclass_Betaproteobacteria
sk__Bacteria	k__Bacteria	p__Proteobacteria	c__Betaproteobacteria	o__Burkholderiales	Unclass_Burkholderiales	Unclass_Burkholderiales	Unclass_Burkholderiales
sk__Bacteria	k__Bacteria	p__Proteobacteria	c__Betaproteobacteria	o__Burkholderiales	f__Burkholderiaceae	Unclass_Burkholderiaceae	Unclass_Burkholderiaceae
sk__Bacteria	k__Bacteria	p__Proteobacteria	c__Betaproteobacteria	o__Burkholderiales	f__Burkholderiaceae	g__Lautropia	Unclass_Lautropia
sk__Bacteria	k__Bacteria	p__Proteobacteria	c__Betaproteobacteria	o__Burkholderiales	f__Burkholderiaceae	g__Lautropia	s__Lautropia_mirabilis
sk__Bacteria	k__Bacteria	p__Proteobacteria	c__Betaproteobacteria	o__Burkholderiales	f__Burkholderiaceae	g__Ralstonia	Unclass_Ralstonia
sk__Bacteria	k__Bacteria	p__Proteobacteria	c__Betaproteobacteria	o__Burkholderiales	f__Comamonadaceae	Unclass_Comamonadaceae	Unclass_Comamonadaceae
sk__Bacteria	k__Bacteria	p__Proteobacteria	c__Betaproteobacteria	o__Burkholderiales	f__Sutterellaceae	g__Parasutterella	Unclass_Parasutterella
sk__Bacteria	k__Bacteria	p__Proteobacteria	c__Betaproteobacteria	o__Burkholderiales	f__Sutterellaceae	g__Sutterella	Unclass_Sutterella
sk__Bacteria	k__Bacteria	p__Proteobacteria	c__Betaproteobacteria	o__Neisseriales	Unclass_Neisseriales	Unclass_Neisseriales	Unclass_Neisseriales
sk__Bacteria	k__Bacteria	p__Proteobacteria	c__Betaproteobacteria	o__Neisseriales	f__Neisseriaceae	Unclass_Neisseriaceae	Unclass_Neisseriaceae
sk__Bacteria	k__Bacteria	p__Proteobacteria	c__Betaproteobacteria	o__Neisseriales	f__Neisseriaceae	g__Neisseria	Unclass_Neisseria
sk__Bacteria	k__Bacteria	p__Proteobacteria	c__Betaproteobacteria	o__Neisseriales	f__Neisseriaceae	g__Simonsiella	Unclass_Simonsiella
sk__Bacteria	k__Bacteria	p__Proteobacteria	c__Betaproteobacteria	o__Nitrosomonadales	f__Nitrosomonadaceae	Unclass_Nitrosomonadaceae	Unclass_Nitrosomonadaceae
sk__Bacteria	k__Bacteria	p__Proteobacteria	c__Deltaproteobacteria	Unclass_Deltaproteobacteria	Unclass_Deltaproteobacteria	Unclass_Deltaproteobacteria	Unclass_Deltaproteobacteria
sk__Bacteria	k__Bacteria	p__Proteobacteria	c__Deltaproteobacteria	o__Bradymonadales	Unclass_Bradymonadales	Unclass_Bradymonadales	Unclass_Bradymonadales
sk__Bacteria	k__Bacteria	p__Proteobacteria	c__Deltaproteobacteria	o__Bradymonadales	f__Bradymonadaceae	Unclass_Bradymonadaceae	Unclass_Bradymonadaceae
sk__Bacteria	k__Bacteria	p__Proteobacteria	c__Deltaproteobacteria	o__Desulfobacterales	f__Desulfobulbaceae	Unclass_Desulfobulbaceae	Unclass_Desulfobulbaceae
sk__Bacteria	k__Bacteria	p__Proteobacteria	c__Deltaproteobacteria	o__Desulfovibrionales	f__Desulfovibrionaceae	Unclass_Desulfovibrionaceae	Unclass_Desulfovibrionaceae
sk__Bacteria	k__Bacteria	p__Proteobacteria	c__Deltaproteobacteria	o__Myxococcales	Unclass_Myxococcales	Unclass_Myxococcales	Unclass_Myxococcales
sk__Bacteria	k__Bacteria	p__Proteobacteria	c__Epsilonproteobacteria	o__Campylobacterales	f__Campylobacteraceae	g__Campylobacter	Unclass_Campylobacter
sk__Bacteria	k__Bacteria	p__Proteobacteria	c__Epsilonproteobacteria	o__Campylobacterales	f__Helicobacteraceae	Unclass_Helicobacteraceae	Unclass_Helicobacteraceae
sk__Bacteria	k__Bacteria	p__Proteobacteria	c__Epsilonproteobacteria	o__Campylobacterales	f__Helicobacteraceae	g__Helicobacter	Unclass_Helicobacter
sk__Bacteria	k__Bacteria	p__Proteobacteria	c__Epsilonproteobacteria	o__Campylobacterales	f__Helicobacteraceae	g__Helicobacter	s__Helicobacter_pylori
sk__Bacteria	k__Bacteria	p__Proteobacteria	c__Gammaproteobacteria	Unclass_Gammaproteobacteria	Unclass_Gammaproteobacteria	Unclass_Gammaproteobacteria	Unclass_Gammaproteobacteria
sk__Bacteria	k__Bacteria	p__Proteobacteria	c__Gammaproteobacteria	o__Aeromonadales	f__Aeromonadaceae	Unclass_Aeromonadaceae	Unclass_Aeromonadaceae
sk__Bacteria	k__Bacteria	p__Proteobacteria	c__Gammaproteobacteria	o__Aeromonadales	f__Succinivibrionaceae	Unclass_Succinivibrionaceae	Unclass_Succinivibrionaceae
sk__Bacteria	k__Bacteria	p__Proteobacteria	c__Gammaproteobacteria	o__Alteromonadales	Unclass_Alteromonadales	Unclass_Alteromonadales	Unclass_Alteromonadales
sk__Bacteria	k__Bacteria	p__Proteobacteria	c__Gammaproteobacteria	o__Alteromonadales	f__Shewanellaceae	g__Shewanella	Unclass_Shewanella
sk__Bacteria	k__Bacteria	p__Proteobacteria	c__Gammaproteobacteria	o__Arenicellales	f__Arenicellaceae	Unclass_Arenicellaceae	Unclass_Arenicellaceae
sk__Bacteria	k__Bacteria	p__Proteobacteria	c__Gammaproteobacteria	o__Cardiobacteriales	f__Cardiobacteriaceae	Unclass_Cardiobacteriaceae	Unclass_Cardiobacteriaceae
sk__Bacteria	k__Bacteria	p__Proteobacteria	c__Gammaproteobacteria	o__Cellvibrionales	Unclass_Cellvibrionales	Unclass_Cellvibrionales	Unclass_Cellvibrionales
sk__Bacteria	k__Bacteria	p__Proteobacteria	c__Gammaproteobacteria	o__Cellvibrionales	f__Halieaceae	Unclass_Halieaceae	Unclass_Halieaceae
sk__Bacteria	k__Bacteria	p__Proteobacteria	c__Gammaproteobacteria	o__Cellvibrionales	f__Spongiibacteraceae	Unclass_Spongiibacteraceae	Unclass_Spongiibacteraceae
sk__Bacteria	k__Bacteria	p__Proteobacteria	c__Gammaproteobacteria	o__Chromatiales	f__Chromatiaceae	Unclass_Chromatiaceae	Unclass_Chromatiaceae
sk__Bacteria	k__Bacteria	p__Proteobacteria	c__Gammaproteobacteria	o__Chromatiales	f__Chromatiaceae	g__Rheinheimera	Unclass_Rheinheimera
sk__Bacteria	k__Bacteria	p__Proteobacteria	c__Gammaproteobacteria	o__Enterobacterales	Unclass_Enterobacterales	Unclass_Enterobacterales	Unclass_Enterobacterales
sk__Bacteria	k__Bacteria	p__Proteobacteria	c__Gammaproteobacteria	o__Enterobacterales	f__Enterobacteriaceae	Unclass_Enterobacteriaceae	Unclass_Enterobacteriaceae
sk__Bacteria	k__Bacteria	p__Proteobacteria	c__Gammaproteobacteria	o__Enterobacterales	f__Enterobacteriaceae	g__Buttiauxella	Unclass_Buttiauxella
sk__Bacteria	k__Bacteria	p__Proteobacteria	c__Gammaproteobacteria	o__Enterobacterales	f__Enterobacteriaceae	g__Candidatus_Benitsuchiphilus	Unclass_Candidatus_Benitsuchiphilus
sk__Bacteria	k__Bacteria	p__Proteobacteria	c__Gammaproteobacteria	o__Enterobacterales	f__Enterobacteriaceae	g__Candidatus_Blochmannia	Unclass_Candidatus_Blochmannia
sk__Bacteria	k__Bacteria	p__Proteobacteria	c__Gammaproteobacteria	o__Enterobacterales	f__Enterobacteriaceae	g__Citrobacter	Unclass_Citrobacter
sk__Bacteria	k__Bacteria	p__Proteobacteria	c__Gammaproteobacteria	o__Enterobacterales	f__Enterobacteriaceae	g__Escherichia	Unclass_Escherichia
sk__Bacteria	k__Bacteria	p__Proteobacteria	c__Gammaproteobacteria	o__Enterobacterales	f__Enterobacteriaceae	g__Escherichia	s__Escherichia_coli
sk__Bacteria	k__Bacteria	p__Proteobacteria	c__Gammaproteobacteria	o__Enterobacterales	f__Enterobacteriaceae	g__Klebsiella	Unclass_Klebsiella
sk__Bacteria	k__Bacteria	p__Proteobacteria	c__Gammaproteobacteria	o__Enterobacterales	f__Enterobacteriaceae	g__Klebsiella	s__Klebsiella_sp._A4
sk__Bacteria	k__Bacteria	p__Proteobacteria	c__Gammaproteobacteria	o__Enterobacterales	f__Enterobacteriaceae	g__Shigella	s__Shigella_dysenteriae
sk__Bacteria	k__Bacteria	p__Proteobacteria	c__Gammaproteobacteria	o__Enterobacterales	f__Enterobacteriaceae	g__Shigella	s__Shigella_sonnei
sk__Bacteria	k__Bacteria	p__Proteobacteria	c__Gammaproteobacteria	o__Enterobacterales	f__Enterobacteriaceae	g__Shimwellia	Unclass_Shimwellia
sk__Bacteria	k__Bacteria	p__Proteobacteria	c__Gammaproteobacteria	o__Enterobacterales	f__Erwiniaceae	Unclass_Erwiniaceae	Unclass_Erwiniaceae
sk__Bacteria	k__Bacteria	p__Proteobacteria	c__Gammaproteobacteria	o__Enterobacterales	f__Morganellaceae	Unclass_Morganellaceae	Unclass_Morganellaceae
sk__Bacteria	k__Bacteria	p__Proteobacteria	c__Gammaproteobacteria	o__Enterobacterales	f__Morganellaceae	g__Xenorhabdus	Unclass_Xenorhabdus
sk__Bacteria	k__Bacteria	p__Proteobacteria	c__Gammaproteobacteria	o__Enterobacterales	f__Pectobacteriaceae	Unclass_Pectobacteriaceae	Unclass_Pectobacteriaceae
sk__Bacteria	k__Bacteria	p__Proteobacteria	c__Gammaproteobacteria	o__Enterobacterales	f__Pectobacteriaceae	g__Brenneria	Unclass_Brenneria
sk__Bacteria	k__Bacteria	p__Proteobacteria	c__Gammaproteobacteria	o__Enterobacterales	f__Pectobacteriaceae	g__Dickeya	Unclass_Dickeya
sk__Bacteria	k__Bacteria	p__Proteobacteria	c__Gammaproteobacteria	o__Enterobacterales	f__Yersiniaceae	Unclass_Yersiniaceae	Unclass_Yersiniaceae
sk__Bacteria	k__Bacteria	p__Proteobacteria	c__Gammaproteobacteria	o__Enterobacterales	f__Yersiniaceae	g__Serratia	Unclass_Serratia
sk__Bacteria	k__Bacteria	p__Proteobacteria	c__Gammaproteobacteria	o__Immundisolibacterales	f__Immundisolibacteraceae	Unclass_Immundisolibacteraceae	Unclass_Immundisolibacteraceae
sk__Bacteria	k__Bacteria	p__Proteobacteria	c__Gammaproteobacteria	o__Legionellales	f__Coxiellaceae	Unclass_Coxiellaceae	Unclass_Coxiellaceae
sk__Bacteria	k__Bacteria	p__Proteobacteria	c__Gammaproteobacteria	o__Oceanospirillales	Unclass_Oceanospirillales	Unclass_Oceanospirillales	Unclass_Oceanospirillales
sk__Bacteria	k__Bacteria	p__Proteobacteria	c__Gammaproteobacteria	o__Oceanospirillales	f__Alcanivoracaceae	g__Alcanivorax	Unclass_Alcanivorax
sk__Bacteria	k__Bacteria	p__Proteobacteria	c__Gammaproteobacteria	o__Oceanospirillales	f__Endozoicomonaceae	Unclass_Endozoicomonaceae	Unclass_Endozoicomonaceae
sk__Bacteria	k__Bacteria	p__Proteobacteria	c__Gammaproteobacteria	o__Oceanospirillales	f__Halomonadaceae	Unclass_Halomonadaceae	Unclass_Halomonadaceae
sk__Bacteria	k__Bacteria	p__Proteobacteria	c__Gammaproteobacteria	o__Oceanospirillales	f__Halomonadaceae	g__Halomonas	Unclass_Halomonas
sk__Bacteria	k__Bacteria	p__Proteobacteria	c__Gammaproteobacteria	o__Oceanospirillales	f__Oceanospirillaceae	Unclass_Oceanospirillaceae	Unclass_Oceanospirillaceae
sk__Bacteria	k__Bacteria	p__Proteobacteria	c__Gammaproteobacteria	o__Pasteurellales	Unclass_Pasteurellales	Unclass_Pasteurellales	Unclass_Pasteurellales
sk__Bacteria	k__Bacteria	p__Proteobacteria	c__Gammaproteobacteria	o__Pasteurellales	f__Pasteurellaceae	Unclass_Pasteurellaceae	Unclass_Pasteurellaceae
sk__Bacteria	k__Bacteria	p__Proteobacteria	c__Gammaproteobacteria	o__Pasteurellales	f__Pasteurellaceae	Unclass_Pasteurellaceae	s__Bisgaard_Taxon_7
sk__Bacteria	k__Bacteria	p__Proteobacteria	c__Gammaproteobacteria	o__Pasteurellales	f__Pasteurellaceae	g__Aggregatibacter	Unclass_Aggregatibacter
sk__Bacteria	k__Bacteria	p__Proteobacteria	c__Gammaproteobacteria	o__Pasteurellales	f__Pasteurellaceae	g__Haemophilus	Unclass_Haemophilus
sk__Bacteria	k__Bacteria	p__Proteobacteria	c__Gammaproteobacteria	o__Pasteurellales	f__Pasteurellaceae	g__Haemophilus	s__Haemophilus_haemolyticus
sk__Bacteria	k__Bacteria	p__Proteobacteria	c__Gammaproteobacteria	o__Pseudomonadales	Unclass_Pseudomonadales	Unclass_Pseudomonadales	Unclass_Pseudomonadales
sk__Bacteria	k__Bacteria	p__Proteobacteria	c__Gammaproteobacteria	o__Pseudomonadales	f__Moraxellaceae	Unclass_Moraxellaceae	Unclass_Moraxellaceae
sk__Bacteria	k__Bacteria	p__Proteobacteria	c__Gammaproteobacteria	o__Pseudomonadales	f__Moraxellaceae	g__Acinetobacter	Unclass_Acinetobacter
sk__Bacteria	k__Bacteria	p__Proteobacteria	c__Gammaproteobacteria	o__Pseudomonadales	f__Moraxellaceae	g__Moraxella	Unclass_Moraxella
sk__Bacteria	k__Bacteria	p__Proteobacteria	c__Gammaproteobacteria	o__Pseudomonadales	f__Moraxellaceae	g__Moraxella	s__Moraxella_osloensis
sk__Bacteria	k__Bacteria	p__Proteobacteria	c__Gammaproteobacteria	o__Pseudomonadales	f__Pseudomonadaceae	Unclass_Pseudomonadaceae	Unclass_Pseudomonadaceae
sk__Bacteria	k__Bacteria	p__Proteobacteria	c__Gammaproteobacteria	o__Pseudomonadales	f__Pseudomonadaceae	g__Pseudomonas	Unclass_Pseudomonas
sk__Bacteria	k__Bacteria	p__Proteobacteria	c__Gammaproteobacteria	o__Thiotrichales	Unclass_Thiotrichales	Unclass_Thiotrichales	Unclass_Thiotrichales
sk__Bacteria	k__Bacteria	p__Proteobacteria	c__Gammaproteobacteria	o__Thiotrichales	f__Thiotrichaceae	Unclass_Thiotrichaceae	Unclass_Thiotrichaceae
sk__Bacteria	k__Bacteria	p__Proteobacteria	c__Gammaproteobacteria	o__Vibrionales	Unclass_Vibrionales	Unclass_Vibrionales	Unclass_Vibrionales
sk__Bacteria	k__Bacteria	p__Proteobacteria	c__Gammaproteobacteria	o__Vibrionales	f__Vibrionaceae	Unclass_Vibrionaceae	Unclass_Vibrionaceae
sk__Bacteria	k__Bacteria	p__Proteobacteria	c__Gammaproteobacteria	o__Vibrionales	f__Vibrionaceae	g__Vibrio	Unclass_Vibrio
sk__Bacteria	k__Bacteria	p__Proteobacteria	c__Gammaproteobacteria	o__Vibrionales	f__Vibrionaceae	g__Vibrio	s__Vibrio_cholerae
sk__Bacteria	k__Bacteria	p__Proteobacteria	c__Gammaproteobacteria	o__Xanthomonadales	f__Xanthomonadaceae	Unclass_Xanthomonadaceae	Unclass_Xanthomonadaceae
sk__Bacteria	k__Bacteria	p__Proteobacteria	c__Oligoflexia	o__Oligoflexales	Unclass_Oligoflexales	Unclass_Oligoflexales	Unclass_Oligoflexales
sk__Bacteria	k__Bacteria	p__Proteobacteria	c__Oligoflexia	o__Oligoflexales	f__Oligoflexaceae	Unclass_Oligoflexaceae	Unclass_Oligoflexaceae
sk__Bacteria	k__Bacteria	p__Proteobacteria	c__Zetaproteobacteria	o__Mariprofundales	f__Mariprofundaceae	Unclass_Mariprofundaceae	Unclass_Mariprofundaceae
sk__Bacteria	k__Bacteria	p__Spirochaetes	c__Spirochaetia	o__Spirochaetales	f__Spirochaetaceae	Unclass_Spirochaetaceae	Unclass_Spirochaetaceae
sk__Bacteria	k__Bacteria	p__Spirochaetes	c__Spirochaetia	o__Spirochaetales	f__Spirochaetaceae	g__Treponema	Unclass_Treponema
sk__Bacteria	k__Bacteria	p__Synergistetes	c__Synergistia	o__Synergistales	f__Synergistaceae	g__Fretibacterium	Unclass_Fretibacterium
sk__Bacteria	k__Bacteria	p__Tenericutes	Unclass_Tenericutes	Unclass_Tenericutes	Unclass_Tenericutes	Unclass_Tenericutes	Unclass_Tenericutes
sk__Bacteria	k__Bacteria	p__Tenericutes	c__Mollicutes	o__Mycoplasmatales	f__Mycoplasmataceae	g__Mycoplasma	Unclass_Mycoplasma
sk__Bacteria	k__Bacteria	p__Verrucomicrobia	c__Verrucomicrobiae	o__Verrucomicrobiales	Unclass_Verrucomicrobiales	Unclass_Verrucomicrobiales	Unclass_Verrucomicrobiales
sk__Bacteria	k__Bacteria	p__Verrucomicrobia	c__Verrucomicrobiae	o__Verrucomicrobiales	f__Akkermansiaceae	Unclass_Akkermansiaceae	Unclass_Akkermansiaceae
sk__Bacteria	k__Bacteria	p__Verrucomicrobia	c__Verrucomicrobiae	o__Verrucomicrobiales	f__Akkermansiaceae	g__Akkermansia	Unclass_Akkermansia
sk__Bacteria	k__Bacteria	p__Verrucomicrobia	c__Verrucomicrobiae	o__Verrucomicrobiales	f__Akkermansiaceae	g__Akkermansia	s__Akkermansia_muciniphila
sk__Chloroplast	Unclass_Chloroplast	Unclass_Chloroplast	Unclass_Chloroplast	Unclass_Chloroplast	Unclass_Chloroplast	Unclass_Chloroplast	Unclass_Chloroplast
sk__Eukaryota	k__Viridiplantae	p__Streptophyta	Unclass_Streptophyta	o__Fabales	f__Fabaceae	Unclass_Fabaceae	Unclass_Fabaceae
sk__Eukaryota	k__Viridiplantae	p__Streptophyta	Unclass_Streptophyta	o__Fabales	f__Fabaceae	g__Ammopiptanthus	Unclass_Ammopiptanthus
sk__Mitochondria	Unclass_Mitochondria	Unclass_Mitochondria	Unclass_Mitochondria	Unclass_Mitochondria	Unclass_Mitochondria	Unclass_Mitochondria	Unclass_Mitochondria
sk__Archaea	Unclass_Archaea	Unclass_Archaea	Unclass_Archaea	Unclass_Archaea	Unclass_Archaea	Unclass_Archaea	Unclass_Archaea
sk__Archaea	k__Archaea	p__Euryarchaeota	c__Methanobacteria	o__Methanobacteriales	Unclass_Methanobacteriales	Unclass_Methanobacteriales	Unclass_Methanobacteriales
sk__Archaea	k__Archaea	p__Euryarchaeota	c__Methanobacteria	o__Methanobacteriales	f__Methanobacteriaceae	Unclass_Methanobacteriaceae	Unclass_Methanobacteriaceae
sk__Archaea	k__Archaea	p__Euryarchaeota	c__Methanobacteria	o__Methanobacteriales	f__Methanobacteriaceae	g__Methanobrevibacter	Unclass_Methanobrevibacter
sk__Archaea	k__Archaea	p__Euryarchaeota	c__Methanobacteria	o__Methanobacteriales	f__Methanobacteriaceae	g__Methanosphaera	Unclass_Methanosphaera
sk__Archaea	k__Archaea	p__Euryarchaeota	c__Thermoplasmata	Unclass_Thermoplasmata	Unclass_Thermoplasmata	Unclass_Thermoplasmata	Unclass_Thermoplasmata
sk__Archaea	k__Archaea	p__Euryarchaeota	c__Thermoplasmata	o__Methanomassiliicoccales	f__Methanomassiliicoccaceae	Unclass_Methanomassiliicoccaceae	Unclass_Methanomassiliicoccaceae
sk__Archaea	k__Archaea	p__Thaumarchaeota	Unclass_Thaumarchaeota	Unclass_Thaumarchaeota	Unclass_Thaumarchaeota	Unclass_Thaumarchaeota	Unclass_Thaumarchaeota
sk__Bacteria	k__Bacteria	Unclass_Bacteria	Unclass_Bacteria	Unclass_Bacteria	Unclass_Bacteria	Unclass_Bacteria	s__bacterium_AD3011
sk__Bacteria	k__Bacteria	Unclass_Bacteria	Unclass_Bacteria	Unclass_Bacteria	Unclass_Bacteria	Unclass_Bacteria	s__bacterium_WCE2007
sk__Bacteria	k__Bacteria	Unclass_Bacteria	Unclass_Bacteria	Unclass_Bacteria	Unclass_Bacteria	Unclass_Bacteria	s__endophytic_bacterium_SV751
sk__Bacteria	k__Bacteria	p__Acidobacteria	Unclass_Acidobacteria	Unclass_Acidobacteria	Unclass_Acidobacteria	Unclass_Acidobacteria	Unclass_Acidobacteria
sk__Bacteria	k__Bacteria	p__Actinobacteria	c__Acidimicrobiia	o__Acidimicrobiales	f__Acidimicrobiaceae	Unclass_Acidimicrobiaceae	Unclass_Acidimicrobiaceae
sk__Bacteria	k__Bacteria	p__Actinobacteria	c__Actinobacteria	o__Acidothermales	Unclass_Acidothermales	Unclass_Acidothermales	Unclass_Acidothermales
sk__Bacteria	k__Bacteria	p__Actinobacteria	c__Actinobacteria	o__Actinomycetales	f__Actinomycetaceae	g__Mobiluncus	Unclass_Mobiluncus
sk__Bacteria	k__Bacteria	p__Actinobacteria	c__Actinobacteria	o__Bifidobacteriales	f__Bifidobacteriaceae	g__Gardnerella	Unclass_Gardnerella
sk__Bacteria	k__Bacteria	p__Actinobacteria	c__Actinobacteria	o__Corynebacteriales	f__Mycobacteriaceae	g__Mycobacterium	Unclass_Mycobacterium
sk__Bacteria	k__Bacteria	p__Actinobacteria	c__Actinobacteria	o__Frankiales	f__Sporichthyaceae	Unclass_Sporichthyaceae	Unclass_Sporichthyaceae
sk__Bacteria	k__Bacteria	p__Actinobacteria	c__Actinobacteria	o__Kineosporiales	f__Kineosporiaceae	Unclass_Kineosporiaceae	Unclass_Kineosporiaceae
sk__Bacteria	k__Bacteria	p__Actinobacteria	c__Actinobacteria	o__Micrococcales	f__Bogoriellaceae	Unclass_Bogoriellaceae	Unclass_Bogoriellaceae
sk__Bacteria	k__Bacteria	p__Actinobacteria	c__Actinobacteria	o__Micrococcales	f__Dermabacteraceae	g__Brachybacterium	Unclass_Brachybacterium
sk__Bacteria	k__Bacteria	p__Actinobacteria	c__Actinobacteria	o__Micrococcales	f__Intrasporangiaceae	g__Serinicoccus	Unclass_Serinicoccus
sk__Bacteria	k__Bacteria	p__Actinobacteria	c__Actinobacteria	o__Micrococcales	f__Micrococcaceae	g__Glutamicibacter	Unclass_Glutamicibacter
sk__Bacteria	k__Bacteria	p__Actinobacteria	c__Actinobacteria	o__Micrococcales	f__Micrococcaceae	g__Kocuria	Unclass_Kocuria
sk__Bacteria	k__Bacteria	p__Actinobacteria	c__Actinobacteria	o__Micrococcales	f__Micrococcaceae	g__Nesterenkonia	Unclass_Nesterenkonia
sk__Bacteria	k__Bacteria	p__Actinobacteria	c__Actinobacteria	o__Propionibacteriales	f__Propionibacteriaceae	g__Propioniciclava	Unclass_Propioniciclava
sk__Bacteria	k__Bacteria	p__Actinobacteria	c__Coriobacteriia	o__Coriobacteriales	Unclass_Coriobacteriales	Unclass_Coriobacteriales	Unclass_Coriobacteriales
sk__Bacteria	k__Bacteria	p__Actinobacteria	c__Coriobacteriia	o__Coriobacteriales	f__Atopobiaceae	g__Atopobium	Unclass_Atopobium
sk__Bacteria	k__Bacteria	p__Actinobacteria	c__Coriobacteriia	o__Coriobacteriales	f__Atopobiaceae	g__Libanicoccus	s__Libanicoccus_massiliensis
sk__Bacteria	k__Bacteria	p__Actinobacteria	c__Coriobacteriia	o__Coriobacteriales	f__Atopobiaceae	g__Olsenella	Unclass_Olsenella
sk__Bacteria	k__Bacteria	p__Actinobacteria	c__Coriobacteriia	o__Coriobacteriales	f__Coriobacteriaceae	g__Collinsella	Unclass_Collinsella
sk__Bacteria	k__Bacteria	p__Actinobacteria	c__Coriobacteriia	o__Coriobacteriales	f__Coriobacteriaceae	g__Collinsella	s__Collinsella_aerofaciens
sk__Bacteria	k__Bacteria	p__Actinobacteria	c__Coriobacteriia	o__Coriobacteriales	f__Coriobacteriaceae	g__Collinsella	s__Collinsella_bouchesdurhonensis
sk__Bacteria	k__Bacteria	p__Actinobacteria	c__Coriobacteriia	o__Coriobacteriales	f__Coriobacteriaceae	g__Collinsella	s__Collinsella_ihuae
sk__Bacteria	k__Bacteria	p__Actinobacteria	c__Coriobacteriia	o__Coriobacteriales	f__Coriobacteriaceae	g__Senegalimassilia	Unclass_Senegalimassilia
sk__Bacteria	k__Bacteria	p__Actinobacteria	c__Coriobacteriia	o__Eggerthellales	Unclass_Eggerthellales	Unclass_Eggerthellales	Unclass_Eggerthellales
sk__Bacteria	k__Bacteria	p__Actinobacteria	c__Nitriliruptoria	o__Euzebyales	Unclass_Euzebyales	Unclass_Euzebyales	Unclass_Euzebyales
sk__Bacteria	k__Bacteria	p__Actinobacteria	c__Rubrobacteria	o__Gaiellales	f__Gaiellaceae	g__Gaiella	Unclass_Gaiella
sk__Bacteria	k__Bacteria	p__Armatimonadetes	Unclass_Armatimonadetes	Unclass_Armatimonadetes	Unclass_Armatimonadetes	Unclass_Armatimonadetes	Unclass_Armatimonadetes
sk__Bacteria	k__Bacteria	p__Bacteroidetes	Unclass_Bacteroidetes	Unclass_Bacteroidetes	Unclass_Bacteroidetes	Unclass_Bacteroidetes	s__Bacteroidetes_bacterium_RBE2CD-54
sk__Bacteria	k__Bacteria	p__Bacteroidetes	c__Bacteroidia	Unclass_Bacteroidia	Unclass_Bacteroidia	Unclass_Bacteroidia	Unclass_Bacteroidia
sk__Bacteria	k__Bacteria	p__Bacteroidetes	c__Bacteroidia	o__Bacteroidales	f__Paludibacteraceae	g__Paludibacter	s__Paludibacter_jiangxiensis
sk__Bacteria	k__Bacteria	p__Bacteroidetes	c__Bacteroidia	o__Bacteroidales	f__Porphyromonadaceae	Unclass_Porphyromonadaceae	Unclass_Porphyromonadaceae
sk__Bacteria	k__Bacteria	p__Bacteroidetes	c__Bacteroidia	o__Bacteroidales	f__Porphyromonadaceae	g__Macellibacteroides	Unclass_Macellibacteroides
sk__Bacteria	k__Bacteria	p__Bacteroidetes	c__Bacteroidia	o__Bacteroidales	f__Prevotellaceae	Unclass_Prevotellaceae	s__Prevotellaceae_bacterium_DJF_CR21k6
sk__Bacteria	k__Bacteria	p__Bacteroidetes	c__Bacteroidia	o__Bacteroidales	f__Prevotellaceae	Unclass_Prevotellaceae	s__Prevotellaceae_bacterium_DJF_VR15
sk__Bacteria	k__Bacteria	p__Bacteroidetes	c__Bacteroidia	o__Bacteroidales	f__Prevotellaceae	g__Massiliprevotella	s__Massiliprevotella_massiliensis
sk__Bacteria	k__Bacteria	p__Bacteroidetes	c__Bacteroidia	o__Bacteroidales	f__Prevotellaceae	g__Prevotella	s__Prevotella_marshii
sk__Bacteria	k__Bacteria	p__Bacteroidetes	c__Bacteroidia	o__Bacteroidales	f__Prevotellaceae	g__Prevotellamassilia	s__Prevotellamassilia_timonensis
sk__Bacteria	k__Bacteria	p__Bacteroidetes	c__Bacteroidia	o__Bacteroidales	f__Rikenellaceae	g__Alistipes	Unclass_Alistipes
sk__Bacteria	k__Bacteria	p__Bacteroidetes	c__Bacteroidia	o__Marinilabiliales	Unclass_Marinilabiliales	Unclass_Marinilabiliales	Unclass_Marinilabiliales
sk__Bacteria	k__Bacteria	p__Bacteroidetes	c__Flavobacteriia	o__Flavobacteriales	Unclass_Flavobacteriales	Unclass_Flavobacteriales	Unclass_Flavobacteriales
sk__Bacteria	k__Bacteria	p__Bacteroidetes	c__Flavobacteriia	o__Flavobacteriales	f__Flavobacteriaceae	g__Empedobacter	Unclass_Empedobacter
sk__Bacteria	k__Bacteria	p__Bacteroidetes	c__Sphingobacteriia	o__Sphingobacteriales	f__Sphingobacteriaceae	g__Arcticibacter	Unclass_Arcticibacter
sk__Bacteria	k__Bacteria	p__Bacteroidetes	c__Sphingobacteriia	o__Sphingobacteriales	f__Sphingobacteriaceae	g__Sphingobacterium	Unclass_Sphingobacterium
sk__Bacteria	k__Bacteria	p__Candidatus_Falkowbacteria	Unclass_Candidatus_Falkowbacteria	Unclass_Candidatus_Falkowbacteria	Unclass_Candidatus_Falkowbacteria	Unclass_Candidatus_Falkowbacteria	Unclass_Candidatus_Falkowbacteria
sk__Bacteria	k__Bacteria	p__Candidatus_Moranbacteria	Unclass_Candidatus_Moranbacteria	Unclass_Candidatus_Moranbacteria	Unclass_Candidatus_Moranbacteria	Unclass_Candidatus_Moranbacteria	Unclass_Candidatus_Moranbacteria
sk__Bacteria	k__Bacteria	p__Chloroflexi	c__Chloroflexia	o__Kallotenuales	Unclass_Kallotenuales	Unclass_Kallotenuales	Unclass_Kallotenuales
sk__Bacteria	k__Bacteria	p__Cyanobacteria	Unclass_Cyanobacteria	Unclass_Cyanobacteria	Unclass_Cyanobacteria	Unclass_Cyanobacteria	Unclass_Cyanobacteria
sk__Bacteria	k__Bacteria	p__Cyanobacteria	Unclass_Cyanobacteria	o__Chroococcales	f__Microcystaceae	Unclass_Microcystaceae	Unclass_Microcystaceae
sk__Bacteria	k__Bacteria	p__Cyanobacteria	Unclass_Cyanobacteria	o__Chroococcales	f__Microcystaceae	g__Microcystis	s__Microcystis_sp._SAG_43.90
sk__Bacteria	k__Bacteria	p__Deferribacteres	c__Deferribacteres	o__Deferribacterales	f__Deferribacteraceae	Unclass_Deferribacteraceae	Unclass_Deferribacteraceae
sk__Bacteria	k__Bacteria	p__Elusimicrobia	c__Elusimicrobia	o__Elusimicrobiales	Unclass_Elusimicrobiales	Unclass_Elusimicrobiales	Unclass_Elusimicrobiales
sk__Bacteria	k__Bacteria	p__Elusimicrobia	c__Elusimicrobia	o__Elusimicrobiales	f__Elusimicrobiaceae	Unclass_Elusimicrobiaceae	Unclass_Elusimicrobiaceae
sk__Bacteria	k__Bacteria	p__Elusimicrobia	c__Elusimicrobia	o__Elusimicrobiales	f__Elusimicrobiaceae	g__Elusimicrobium	Unclass_Elusimicrobium
sk__Bacteria	k__Bacteria	p__Fibrobacteres	c__Fibrobacteria	o__Fibrobacterales	f__Fibrobacteraceae	g__Fibrobacter	Unclass_Fibrobacter
sk__Bacteria	k__Bacteria	p__Firmicutes	c__Bacilli	o__Bacillales	f__Elusimicrobiaceae	Unclass_Alicyclobacillaceae	Unclass_Alicyclobacillaceae
sk__Bacteria	k__Bacteria	p__Firmicutes	c__Bacilli	o__Bacillales	f__Thermoactinomycetaceae	Unclass_Thermoactinomycetaceae	Unclass_Thermoactinomycetaceae
sk__Bacteria	k__Bacteria	p__Firmicutes	c__Bacilli	o__Lactobacillales	Unclass_Lactobacillales	Unclass_Lactobacillales	s__Lactobacillales_bacterium_HY-36-1
sk__Bacteria	k__Bacteria	p__Firmicutes	c__Bacilli	o__Lactobacillales	f__Leuconostocaceae	g__Weissella	Unclass_Weissella
sk__Bacteria	k__Bacteria	p__Firmicutes	c__Bacilli	o__Lactobacillales	f__Streptococcaceae	g__Streptococcus	s__Streptococcus_anginosus
sk__Bacteria	k__Bacteria	p__Firmicutes	c__Bacilli	o__Lactobacillales	f__Streptococcaceae	g__Streptococcus	s__Streptococcus_danieliae
sk__Bacteria	k__Bacteria	p__Firmicutes	c__Bacilli	o__Lactobacillales	f__Streptococcaceae	g__Streptococcus	s__Streptococcus_ferus
sk__Bacteria	k__Bacteria	p__Firmicutes	c__Clostridia	o__Clostridiales	Unclass_Clostridiales	g__Howardella	Unclass_Howardella
sk__Bacteria	k__Bacteria	p__Firmicutes	c__Clostridia	o__Clostridiales	Unclass_Clostridiales	g__Intestinimonas	Unclass_Intestinimonas
sk__Bacteria	k__Bacteria	p__Firmicutes	c__Clostridia	o__Clostridiales	f__Christensenellaceae	g__Christensenella	Unclass_Christensenella
sk__Bacteria	k__Bacteria	p__Firmicutes	c__Clostridia	o__Clostridiales	f__Clostridiaceae	g__Butyricicoccus	Unclass_Butyricicoccus
sk__Bacteria	k__Bacteria	p__Firmicutes	c__Clostridia	o__Clostridiales	f__Clostridiaceae	g__Clostridium	s__Clostridium_magnum
sk__Bacteria	k__Bacteria	p__Firmicutes	c__Clostridia	o__Clostridiales	f__Clostridiaceae	g__Oxobacter	Unclass_Oxobacter
sk__Bacteria	k__Bacteria	p__Firmicutes	c__Clostridia	o__Clostridiales	f__Clostridiales_Family_XII._Incertae_Sedis	g__Acidaminobacter	Unclass_Acidaminobacter
sk__Bacteria	k__Bacteria	p__Firmicutes	c__Clostridia	o__Clostridiales	f__Clostridiales_Family_XIII._Incertae_Sedis	Unclass_Clostridiales_Family_XIII._Incertae_Sedis	Unclass_Clostridiales_Family_XIII._Incertae_Sedis
sk__Bacteria	k__Bacteria	p__Firmicutes	c__Clostridia	o__Clostridiales	f__Defluviitaleaceae	Unclass_Defluviitaleaceae	Unclass_Defluviitaleaceae
sk__Bacteria	k__Bacteria	p__Firmicutes	c__Clostridia	o__Clostridiales	f__Eubacteriaceae	g__Anaerofustis	Unclass_Anaerofustis
sk__Bacteria	k__Bacteria	p__Firmicutes	c__Clostridia	o__Clostridiales	f__Eubacteriaceae	g__Eubacterium	Unclass_Eubacterium
sk__Bacteria	k__Bacteria	p__Firmicutes	c__Clostridia	o__Clostridiales	f__Eubacteriaceae	g__Eubacterium	s__Eubacterium_coprostanoligenes
sk__Bacteria	k__Bacteria	p__Firmicutes	c__Clostridia	o__Clostridiales	f__Eubacteriaceae	g__Eubacterium	s__[Eubacterium]_eligens
sk__Bacteria	k__Bacteria	p__Firmicutes	c__Clostridia	o__Clostridiales	f__Lachnospiraceae	Unclass_Lachnospiraceae	s__Lachnospiraceae_bacterium_oral_taxon_F15
sk__Bacteria	k__Bacteria	p__Firmicutes	c__Clostridia	o__Clostridiales	f__Lachnospiraceae	g__Butyrivibrio	Unclass_Butyrivibrio
sk__Bacteria	k__Bacteria	p__Firmicutes	c__Clostridia	o__Clostridiales	f__Lachnospiraceae	g__Butyrivibrio	s__Butyrivibrio_crossotus
sk__Bacteria	k__Bacteria	p__Firmicutes	c__Clostridia	o__Clostridiales	f__Lachnospiraceae	g__Eisenbergiella	Unclass_Eisenbergiella
sk__Bacteria	k__Bacteria	p__Firmicutes	c__Clostridia	o__Clostridiales	f__Lachnospiraceae	g__Fusicatenibacter	Unclass_Fusicatenibacter
sk__Bacteria	k__Bacteria	p__Firmicutes	c__Clostridia	o__Clostridiales	f__Lachnospiraceae	g__Lachnospira	Unclass_Lachnospira
sk__Bacteria	k__Bacteria	p__Firmicutes	c__Clostridia	o__Clostridiales	f__Lachnospiraceae	g__Marvinbryantia	Unclass_Marvinbryantia
sk__Bacteria	k__Bacteria	p__Firmicutes	c__Clostridia	o__Clostridiales	f__Lachnospiraceae	g__Moryella	Unclass_Moryella
sk__Bacteria	k__Bacteria	p__Firmicutes	c__Clostridia	o__Clostridiales	f__Lachnospiraceae	g__Oribacterium	Unclass_Oribacterium
sk__Bacteria	k__Bacteria	p__Firmicutes	c__Clostridia	o__Clostridiales	f__Lachnospiraceae	g__Tyzzerella	Unclass_Tyzzerella
sk__Bacteria	k__Bacteria	p__Firmicutes	c__Clostridia	o__Clostridiales	f__Peptococcaceae	g__Peptococcus	Unclass_Peptococcus
sk__Bacteria	k__Bacteria	p__Firmicutes	c__Clostridia	o__Clostridiales	f__Peptostreptococcaceae	g__Romboutsia	Unclass_Romboutsia
sk__Bacteria	k__Bacteria	p__Firmicutes	c__Clostridia	o__Clostridiales	f__Ruminococcaceae	g__Candidatus_Soleaferrea	Unclass_Candidatus_Soleaferrea
sk__Bacteria	k__Bacteria	p__Firmicutes	c__Clostridia	o__Clostridiales	f__Ruminococcaceae	g__Faecalibacterium	s__Faecalibacterium_prausnitzii
sk__Bacteria	k__Bacteria	p__Firmicutes	c__Clostridia	o__Clostridiales	f__Ruminococcaceae	g__Fournierella	Unclass_Fournierella
sk__Bacteria	k__Bacteria	p__Firmicutes	c__Clostridia	o__Clostridiales	f__Ruminococcaceae	g__Negativibacillus	Unclass_Negativibacillus
sk__Bacteria	k__Bacteria	p__Firmicutes	c__Clostridia	o__Clostridiales	f__Ruminococcaceae	g__Papillibacter	Unclass_Papillibacter
sk__Bacteria	k__Bacteria	p__Firmicutes	c__Clostridia	o__Clostridiales	f__Ruminococcaceae	g__Phocea	Unclass_Phocea
sk__Bacteria	k__Bacteria	p__Firmicutes	c__Clostridia	o__Clostridiales	f__Ruminococcaceae	g__Ruminiclostridium	s__[Eubacterium]_siraeum
sk__Bacteria	k__Bacteria	p__Firmicutes	c__Clostridia	o__Clostridiales	f__Ruminococcaceae	g__Saccharofermentans	Unclass_Saccharofermentans
sk__Bacteria	k__Bacteria	p__Firmicutes	c__Clostridia	o__Clostridiales	f__Ruminococcaceae	g__Sporobacter	Unclass_Sporobacter
sk__Bacteria	k__Bacteria	p__Firmicutes	c__Erysipelotrichia	o__Erysipelotrichales	f__Erysipelotrichaceae	g__Catenibacterium	s__Catenibacterium_mitsuokai
sk__Bacteria	k__Bacteria	p__Firmicutes	c__Erysipelotrichia	o__Erysipelotrichales	f__Erysipelotrichaceae	g__Dielma	Unclass_Dielma
sk__Bacteria	k__Bacteria	p__Firmicutes	c__Erysipelotrichia	o__Erysipelotrichales	f__Erysipelotrichaceae	g__Erysipelothrix	Unclass_Erysipelothrix
sk__Bacteria	k__Bacteria	p__Firmicutes	c__Negativicutes	o__Selenomonadales	f__Selenomonadaceae	g__Anaerovibrio	Unclass_Anaerovibrio
sk__Bacteria	k__Bacteria	p__Firmicutes	c__Negativicutes	o__Selenomonadales	f__Selenomonadaceae	g__Mitsuokella	Unclass_Mitsuokella
sk__Bacteria	k__Bacteria	p__Firmicutes	c__Negativicutes	o__Selenomonadales	f__Selenomonadaceae	g__Selenomonas	Unclass_Selenomonas
sk__Bacteria	k__Bacteria	p__Firmicutes	c__Negativicutes	o__Selenomonadales	f__Sporomusaceae	g__Sporomusa	Unclass_Sporomusa
sk__Bacteria	k__Bacteria	p__Firmicutes	c__Negativicutes	o__Veillonellales	f__Veillonellaceae	g__Allisonella	Unclass_Allisonella
sk__Bacteria	k__Bacteria	p__Firmicutes	c__Negativicutes	o__Veillonellales	f__Veillonellaceae	g__Dialister	s__Dialister_sp._67
sk__Bacteria	k__Bacteria	p__Firmicutes	c__Negativicutes	o__Veillonellales	f__Veillonellaceae	g__Megasphaera	Unclass_Megasphaera
sk__Bacteria	k__Bacteria	p__Firmicutes	c__Tissierellia	Unclass_Tissierellia	Unclass_Tissierellia	Unclass_Tissierellia	Unclass_Tissierellia
sk__Bacteria	k__Bacteria	p__Firmicutes	c__Tissierellia	o__Tissierellales	f__Peptoniphilaceae	g__Finegoldia	Unclass_Finegoldia
sk__Bacteria	k__Bacteria	p__Firmicutes	c__Tissierellia	o__Tissierellales	f__Peptoniphilaceae	g__Parvimonas	Unclass_Parvimonas
sk__Bacteria	k__Bacteria	p__Fusobacteria	c__Fusobacteriia	o__Fusobacteriales	Unclass_Fusobacteriales	Unclass_Fusobacteriales	Unclass_Fusobacteriales
sk__Bacteria	k__Bacteria	p__Fusobacteria	c__Fusobacteriia	o__Fusobacteriales	f__Fusobacteriaceae	Unclass_Fusobacteriaceae	Unclass_Fusobacteriaceae
sk__Bacteria	k__Bacteria	p__Fusobacteria	c__Fusobacteriia	o__Fusobacteriales	f__Fusobacteriaceae	g__Cetobacterium	Unclass_Cetobacterium
sk__Bacteria	k__Bacteria	p__Gemmatimonadetes	Unclass_Gemmatimonadetes	Unclass_Gemmatimonadetes	Unclass_Gemmatimonadetes	Unclass_Gemmatimonadetes	Unclass_Gemmatimonadetes
sk__Bacteria	k__Bacteria	p__Gemmatimonadetes	c__Gemmatimonadetes	o__Gemmatimonadales	f__Gemmatimonadaceae	Unclass_Gemmatimonadaceae	Unclass_Gemmatimonadaceae
sk__Bacteria	k__Bacteria	p__Ignavibacteriae	c__Ignavibacteria	Unclass_Ignavibacteria	Unclass_Ignavibacteria	Unclass_Ignavibacteria	Unclass_Ignavibacteria
sk__Bacteria	k__Bacteria	p__Lentisphaerae	c__Lentisphaeria	o__Victivallales	Unclass_Victivallales	Unclass_Victivallales	Unclass_Victivallales
sk__Bacteria	k__Bacteria	p__Nitrospirae	Unclass_Nitrospirae	Unclass_Nitrospirae	Unclass_Nitrospirae	Unclass_Nitrospirae	Unclass_Nitrospirae
sk__Bacteria	k__Bacteria	p__Proteobacteria	c__Acidithiobacillia	o__Acidithiobacillales	f__Acidithiobacillaceae	Unclass_Acidithiobacillaceae	Unclass_Acidithiobacillaceae
sk__Bacteria	k__Bacteria	p__Proteobacteria	c__Alphaproteobacteria	o__Holosporales	f__Candidatus_Paracaedibacteraceae	Unclass_Candidatus_Paracaedibacteraceae	Unclass_Candidatus_Paracaedibacteraceae
sk__Bacteria	k__Bacteria	p__Proteobacteria	c__Alphaproteobacteria	o__Rhizobiales	f__Hyphomicrobiaceae	Unclass_Hyphomicrobiaceae	Unclass_Hyphomicrobiaceae
sk__Bacteria	k__Bacteria	p__Proteobacteria	c__Alphaproteobacteria	o__Rhodospirillales	f__Acetobacteraceae	Unclass_Acetobacteraceae	Unclass_Acetobacteraceae
sk__Bacteria	k__Bacteria	p__Proteobacteria	c__Alphaproteobacteria	o__Rhodospirillales	f__Acetobacteraceae	g__Craurococcus	Unclass_Craurococcus
sk__Bacteria	k__Bacteria	p__Proteobacteria	c__Alphaproteobacteria	o__Rhodospirillales	f__Acetobacteraceae	g__Roseomonas	Unclass_Roseomonas
sk__Bacteria	k__Bacteria	p__Proteobacteria	c__Alphaproteobacteria	o__Rhodospirillales	f__Geminicoccaceae	g__Candidatus_Alysiosphaera	Unclass_Candidatus_Alysiosphaera
sk__Bacteria	k__Bacteria	p__Proteobacteria	c__Alphaproteobacteria	o__Rickettsiales	f__Rickettsiaceae	Unclass_Rickettsiaceae	Unclass_Rickettsiaceae
sk__Bacteria	k__Bacteria	p__Proteobacteria	c__Betaproteobacteria	o__Burkholderiales	Unclass_Burkholderiales	g__Sphaerotilus	Unclass_Sphaerotilus
sk__Bacteria	k__Bacteria	p__Proteobacteria	c__Betaproteobacteria	o__Burkholderiales	f__Comamonadaceae	g__Comamonas	Unclass_Comamonas
sk__Bacteria	k__Bacteria	p__Proteobacteria	c__Betaproteobacteria	o__Burkholderiales	f__Comamonadaceae	g__Diaphorobacter	Unclass_Diaphorobacter
sk__Bacteria	k__Bacteria	p__Proteobacteria	c__Betaproteobacteria	o__Burkholderiales	f__Oxalobacteraceae	g__Oxalobacter	Unclass_Oxalobacter
sk__Bacteria	k__Bacteria	p__Proteobacteria	c__Betaproteobacteria	o__Burkholderiales	f__Oxalobacteraceae	g__Oxalobacter	s__Oxalobacter_formigenes
sk__Bacteria	k__Bacteria	p__Proteobacteria	c__Betaproteobacteria	o__Neisseriales	f__Neisseriaceae	g__Eikenella	Unclass_Eikenella
sk__Bacteria	k__Bacteria	p__Proteobacteria	c__Betaproteobacteria	o__Neisseriales	f__Neisseriaceae	g__Kingella	Unclass_Kingella
sk__Bacteria	k__Bacteria	p__Proteobacteria	c__Betaproteobacteria	o__Neisseriales	f__Neisseriaceae	g__Neisseria	s__Neisseria_meningitidis
sk__Bacteria	k__Bacteria	p__Proteobacteria	c__Betaproteobacteria	o__Neisseriales	f__Neisseriaceae	g__Neisseria	s__Neisseria_shayeganii
sk__Bacteria	k__Bacteria	p__Proteobacteria	c__Betaproteobacteria	o__Nitrosomonadales	Unclass_Nitrosomonadales	Unclass_Nitrosomonadales	Unclass_Nitrosomonadales
sk__Bacteria	k__Bacteria	p__Proteobacteria	c__Betaproteobacteria	o__Nitrosomonadales	f__Thiobacillaceae	Unclass_Thiobacillaceae	Unclass_Thiobacillaceae
sk__Bacteria	k__Bacteria	p__Proteobacteria	c__Betaproteobacteria	o__Nitrosomonadales	f__Thiobacillaceae	g__Thiobacillus	Unclass_Thiobacillus
sk__Bacteria	k__Bacteria	p__Proteobacteria	c__Betaproteobacteria	o__Rhodocyclales	Unclass_Rhodocyclales	Unclass_Rhodocyclales	Unclass_Rhodocyclales
sk__Bacteria	k__Bacteria	p__Proteobacteria	c__Betaproteobacteria	o__Rhodocyclales	f__Azonexaceae	g__Azonexus	Unclass_Azonexus
sk__Bacteria	k__Bacteria	p__Proteobacteria	c__Betaproteobacteria	o__Rhodocyclales	f__Rhodocyclaceae	Unclass_Rhodocyclaceae	Unclass_Rhodocyclaceae
sk__Bacteria	k__Bacteria	p__Proteobacteria	c__Betaproteobacteria	o__Rhodocyclales	f__Zoogloeaceae	g__Zoogloea	Unclass_Zoogloea
sk__Bacteria	k__Bacteria	p__Proteobacteria	c__Deltaproteobacteria	o__Desulfovibrionales	Unclass_Desulfovibrionales	Unclass_Desulfovibrionales	Unclass_Desulfovibrionales
sk__Bacteria	k__Bacteria	p__Proteobacteria	c__Deltaproteobacteria	o__Desulfovibrionales	f__Desulfomicrobiaceae	g__Desulfomicrobium	Unclass_Desulfomicrobium
sk__Bacteria	k__Bacteria	p__Proteobacteria	c__Deltaproteobacteria	o__Desulfovibrionales	f__Desulfomicrobiaceae	g__Desulfomicrobium	s__Desulfomicrobium_baculatum
sk__Bacteria	k__Bacteria	p__Proteobacteria	c__Deltaproteobacteria	o__Desulfovibrionales	f__Desulfovibrionaceae	g__Bilophila	Unclass_Bilophila
sk__Bacteria	k__Bacteria	p__Proteobacteria	c__Deltaproteobacteria	o__Desulfovibrionales	f__Desulfovibrionaceae	g__Desulfovibrio	Unclass_Desulfovibrio
sk__Bacteria	k__Bacteria	p__Proteobacteria	c__Deltaproteobacteria	o__Desulfovibrionales	f__Desulfovibrionaceae	g__Mailhella	s__Mailhella_massiliensis
sk__Bacteria	k__Bacteria	p__Proteobacteria	c__Deltaproteobacteria	o__Desulfuromonadales	Unclass_Desulfuromonadales	Unclass_Desulfuromonadales	Unclass_Desulfuromonadales
sk__Bacteria	k__Bacteria	p__Proteobacteria	c__Deltaproteobacteria	o__Desulfuromonadales	f__Desulfuromonadaceae	g__Pelobacter	Unclass_Pelobacter
sk__Bacteria	k__Bacteria	p__Proteobacteria	c__Deltaproteobacteria	o__Desulfuromonadales	f__Geobacteraceae	g__Geobacter	Unclass_Geobacter
sk__Bacteria	k__Bacteria	p__Proteobacteria	c__Epsilonproteobacteria	o__Campylobacterales	f__Campylobacteraceae	Unclass_Campylobacteraceae	Unclass_Campylobacteraceae
sk__Bacteria	k__Bacteria	p__Proteobacteria	c__Epsilonproteobacteria	o__Campylobacterales	f__Campylobacteraceae	g__Arcobacter	Unclass_Arcobacter
sk__Bacteria	k__Bacteria	p__Proteobacteria	c__Epsilonproteobacteria	o__Campylobacterales	f__Campylobacteraceae	g__Campylobacter	s__Campylobacter_faecalis
sk__Bacteria	k__Bacteria	p__Proteobacteria	c__Epsilonproteobacteria	o__Campylobacterales	f__Campylobacteraceae	g__Sulfurospirillum	Unclass_Sulfurospirillum
sk__Bacteria	k__Bacteria	p__Proteobacteria	c__Gammaproteobacteria	o__Aeromonadales	Unclass_Aeromonadales	Unclass_Aeromonadales	Unclass_Aeromonadales
sk__Bacteria	k__Bacteria	p__Proteobacteria	c__Gammaproteobacteria	o__Aeromonadales	f__Aeromonadaceae	g__Aeromonas	Unclass_Aeromonas
sk__Bacteria	k__Bacteria	p__Proteobacteria	c__Gammaproteobacteria	o__Aeromonadales	f__Succinivibrionaceae	g__Anaerobiospirillum	Unclass_Anaerobiospirillum
sk__Bacteria	k__Bacteria	p__Proteobacteria	c__Gammaproteobacteria	o__Aeromonadales	f__Succinivibrionaceae	g__Ruminobacter	Unclass_Ruminobacter
sk__Bacteria	k__Bacteria	p__Proteobacteria	c__Gammaproteobacteria	o__Aeromonadales	f__Succinivibrionaceae	g__Succinivibrio	Unclass_Succinivibrio
sk__Bacteria	k__Bacteria	p__Proteobacteria	c__Gammaproteobacteria	o__Aeromonadales	f__Succinivibrionaceae	g__Succinivibrio	s__Succinivibrio_dextrinosolvens
sk__Bacteria	k__Bacteria	p__Proteobacteria	c__Gammaproteobacteria	o__Alteromonadales	f__Alteromonadaceae	Unclass_Alteromonadaceae	Unclass_Alteromonadaceae
sk__Bacteria	k__Bacteria	p__Proteobacteria	c__Gammaproteobacteria	o__Alteromonadales	f__Moritellaceae	Unclass_Moritellaceae	Unclass_Moritellaceae
sk__Bacteria	k__Bacteria	p__Proteobacteria	c__Gammaproteobacteria	o__Cellvibrionales	f__Porticoccaceae	Unclass_Porticoccaceae	Unclass_Porticoccaceae
sk__Bacteria	k__Bacteria	p__Proteobacteria	c__Gammaproteobacteria	o__Chromatiales	Unclass_Chromatiales	Unclass_Chromatiales	Unclass_Chromatiales
sk__Bacteria	k__Bacteria	p__Proteobacteria	c__Gammaproteobacteria	o__Chromatiales	f__Halothiobacillaceae	Unclass_Halothiobacillaceae	Unclass_Halothiobacillaceae
sk__Bacteria	k__Bacteria	p__Proteobacteria	c__Gammaproteobacteria	o__Enterobacterales	Unclass_Enterobacterales	g__Plesiomonas	Unclass_Plesiomonas
sk__Bacteria	k__Bacteria	p__Proteobacteria	c__Gammaproteobacteria	o__Enterobacterales	f__Enterobacteriaceae	g__Cronobacter	Unclass_Cronobacter
sk__Bacteria	k__Bacteria	p__Proteobacteria	c__Gammaproteobacteria	o__Enterobacterales	f__Erwiniaceae	g__Buchnera	s__Buchnera_aphidicola
sk__Bacteria	k__Bacteria	p__Proteobacteria	c__Gammaproteobacteria	o__Enterobacterales	f__Hafniaceae	Unclass_Hafniaceae	Unclass_Hafniaceae
sk__Bacteria	k__Bacteria	p__Proteobacteria	c__Gammaproteobacteria	o__Enterobacterales	f__Hafniaceae	g__Edwardsiella	Unclass_Edwardsiella
sk__Bacteria	k__Bacteria	p__Proteobacteria	c__Gammaproteobacteria	o__Enterobacterales	f__Morganellaceae	g__Morganella	Unclass_Morganella
sk__Bacteria	k__Bacteria	p__Proteobacteria	c__Gammaproteobacteria	o__Legionellales	Unclass_Legionellales	Unclass_Legionellales	Unclass_Legionellales
sk__Bacteria	k__Bacteria	p__Proteobacteria	c__Gammaproteobacteria	o__Legionellales	f__Legionellaceae	Unclass_Legionellaceae	Unclass_Legionellaceae
sk__Bacteria	k__Bacteria	p__Proteobacteria	c__Gammaproteobacteria	o__Methylococcales	f__Methylococcaceae	g__Methyloparacoccus	Unclass_Methyloparacoccus
sk__Bacteria	k__Bacteria	p__Proteobacteria	c__Gammaproteobacteria	o__Oceanospirillales	f__Alcanivoracaceae	Unclass_Alcanivoracaceae	Unclass_Alcanivoracaceae
sk__Bacteria	k__Bacteria	p__Proteobacteria	c__Gammaproteobacteria	o__Pasteurellales	f__Pasteurellaceae	g__Actinobacillus	Unclass_Actinobacillus
sk__Bacteria	k__Bacteria	p__Proteobacteria	c__Gammaproteobacteria	o__Vibrionales	f__Vibrionaceae	g__Aliivibrio	Unclass_Aliivibrio
sk__Bacteria	k__Bacteria	p__Proteobacteria	c__Gammaproteobacteria	o__Vibrionales	f__Vibrionaceae	g__Vibrio	s__Vibrio_metoecus
sk__Bacteria	k__Bacteria	p__Proteobacteria	c__Gammaproteobacteria	o__Vibrionales	f__Vibrionaceae	g__Vibrio	s__Vibrio_neptunius
sk__Bacteria	k__Bacteria	p__Proteobacteria	c__Gammaproteobacteria	o__Vibrionales	f__Vibrionaceae	g__Vibrio	s__Vibrio_proteolyticus
sk__Bacteria	k__Bacteria	p__Proteobacteria	c__Gammaproteobacteria	o__Xanthomonadales	Unclass_Xanthomonadales	Unclass_Xanthomonadales	Unclass_Xanthomonadales
sk__Bacteria	k__Bacteria	p__Proteobacteria	c__Gammaproteobacteria	o__Xanthomonadales	f__Xanthomonadaceae	g__Lysobacter	Unclass_Lysobacter
sk__Bacteria	k__Bacteria	p__Proteobacteria	c__Gammaproteobacteria	o__Xanthomonadales	f__Xanthomonadaceae	g__Stenotrophomonas	Unclass_Stenotrophomonas
sk__Bacteria	k__Bacteria	p__Proteobacteria	c__Oligoflexia	Unclass_Oligoflexia	Unclass_Oligoflexia	Unclass_Oligoflexia	Unclass_Oligoflexia
sk__Bacteria	k__Bacteria	p__Proteobacteria	c__Oligoflexia	o__Bacteriovoracales	f__Bacteriovoracaceae	g__Bacteriovorax	Unclass_Bacteriovorax
sk__Bacteria	k__Bacteria	p__Proteobacteria	c__Oligoflexia	o__Bacteriovoracales	f__Bacteriovoracaceae	g__Peredibacter	Unclass_Peredibacter
sk__Bacteria	k__Bacteria	p__Proteobacteria	c__Oligoflexia	o__Bdellovibrionales	f__Bdellovibrionaceae	Unclass_Bdellovibrionaceae	Unclass_Bdellovibrionaceae
sk__Bacteria	k__Bacteria	p__Proteobacteria	c__Zetaproteobacteria	Unclass_Zetaproteobacteria	Unclass_Zetaproteobacteria	Unclass_Zetaproteobacteria	Unclass_Zetaproteobacteria
sk__Bacteria	k__Bacteria	p__Spirochaetes	c__Spirochaetia	o__Brachyspirales	Unclass_Brachyspirales	Unclass_Brachyspirales	Unclass_Brachyspirales
sk__Bacteria	k__Bacteria	p__Spirochaetes	c__Spirochaetia	o__Brachyspirales	f__Brachyspiraceae	Unclass_Brachyspiraceae	Unclass_Brachyspiraceae
sk__Bacteria	k__Bacteria	p__Spirochaetes	c__Spirochaetia	o__Brachyspirales	f__Brachyspiraceae	g__Brachyspira	Unclass_Brachyspira
sk__Bacteria	k__Bacteria	p__Spirochaetes	c__Spirochaetia	o__Spirochaetales	Unclass_Spirochaetales	Unclass_Spirochaetales	Unclass_Spirochaetales
sk__Bacteria	k__Bacteria	p__Synergistetes	c__Synergistia	o__Synergistales	Unclass_Synergistales	Unclass_Synergistales	Unclass_Synergistales
sk__Bacteria	k__Bacteria	p__Tenericutes	c__Mollicutes	Unclass_Mollicutes	Unclass_Mollicutes	Unclass_Mollicutes	Unclass_Mollicutes
sk__Bacteria	k__Bacteria	p__Tenericutes	c__Mollicutes	o__Anaeroplasmatales	f__Anaeroplasmataceae	Unclass_Anaeroplasmataceae	Unclass_Anaeroplasmataceae
sk__Bacteria	k__Bacteria	p__Tenericutes	c__Mollicutes	o__Anaeroplasmatales	f__Anaeroplasmataceae	g__Asteroleplasma	Unclass_Asteroleplasma
sk__Bacteria	k__Bacteria	p__Verrucomicrobia	c__Opitutae	o__Opitutales	f__Opitutaceae	Unclass_Opitutaceae	Unclass_Opitutaceae
sk__Bacteria	k__Bacteria	p__Verrucomicrobia	c__Opitutae	o__Puniceicoccales	f__Puniceicoccaceae	Unclass_Puniceicoccaceae	Unclass_Puniceicoccaceae
sk__Bacteria	k__Bacteria	p__Verrucomicrobia	c__Verrucomicrobiae	Unclass_Verrucomicrobiae	Unclass_Verrucomicrobiae	Unclass_Verrucomicrobiae	Unclass_Verrucomicrobiae
sk__Eukaryota	Unclass_Eukaryota	Unclass_Eukaryota	Unclass_Eukaryota	Unclass_Eukaryota	Unclass_Eukaryota	Unclass_Eukaryota	Unclass_Eukaryota
sk__Eukaryota	k__Eukaryota	Unclass_Eukaryota	Unclass_Eukaryota	Unclass_Eukaryota	Unclass_Eukaryota	g__Cryptocaryon	Unclass_Cryptocaryon
sk__Eukaryota	k__Eukaryota	Unclass_Eukaryota	Unclass_Eukaryota	o__Bicosoecida	Unclass_Bicosoecida	Unclass_Bicosoecida	Unclass_Bicosoecida
sk__Eukaryota	k__Eukaryota	Unclass_Eukaryota	Unclass_Eukaryota	o__Bicosoecida	f__Bicosoecidae	g__Bicosoeca	Unclass_Bicosoeca
sk__Eukaryota	k__Eukaryota	Unclass_Eukaryota	Unclass_Eukaryota	o__Kinetoplastida	f__Bodonidae	g__Bodo	Unclass_Bodo
sk__Eukaryota	k__Eukaryota	Unclass_Eukaryota	Unclass_Eukaryota	o__Perkinsida	f__Perkinsidae	Unclass_Perkinsidae	Unclass_Perkinsidae
sk__Eukaryota	k__Eukaryota	Unclass_Eukaryota	c__Chrysophyceae	Unclass_Chrysophyceae	Unclass_Chrysophyceae	Unclass_Chrysophyceae	Unclass_Chrysophyceae
sk__Eukaryota	k__Eukaryota	Unclass_Eukaryota	c__Chrysophyceae	Unclass_Chrysophyceae	Unclass_Chrysophyceae	Unclass_Chrysophyceae	s__Spumella-like_flagellate_JBC27
sk__Eukaryota	k__Eukaryota	Unclass_Eukaryota	c__Chrysophyceae	o__Chromulinales	Unclass_Chromulinales	Unclass_Chromulinales	Unclass_Chromulinales
sk__Eukaryota	k__Eukaryota	Unclass_Eukaryota	c__Chrysophyceae	o__Chromulinales	f__Chromulinaceae	Unclass_Chromulinaceae	Unclass_Chromulinaceae
sk__Eukaryota	k__Eukaryota	Unclass_Eukaryota	c__Labyrinthulomycetes	Unclass_Labyrinthulomycetes	Unclass_Labyrinthulomycetes	Unclass_Labyrinthulomycetes	Unclass_Labyrinthulomycetes
sk__Eukaryota	k__Eukaryota	Unclass_Eukaryota	c__Oligohymenophorea	o__Philasterida	f__Loxocephalidae	g__Dexiotricha	s__Dexiotricha_cf._granulosa
sk__Eukaryota	k__Eukaryota	p__Bacillariophyta	Unclass_Bacillariophyta	Unclass_Bacillariophyta	Unclass_Bacillariophyta	Unclass_Bacillariophyta	Unclass_Bacillariophyta
sk__Eukaryota	k__Fungi	p__Ascomycota	c__Saccharomycetes	o__Saccharomycetales	f__Debaryomycetaceae	Unclass_Debaryomycetaceae	Unclass_Debaryomycetaceae
sk__Eukaryota	k__Fungi	p__Basidiomycota	c__Tremellomycetes	o__Filobasidiales	Unclass_Filobasidiales	Unclass_Filobasidiales	Unclass_Filobasidiales
sk__Mitochondria	k__Mitochondria	Unclass_Mitochondria	Unclass_Mitochondria	Unclass_Mitochondria	Unclass_Mitochondria	Unclass_Mitochondria	s__metagenome
sk__Bacteria	k__Bacteria	Unclass_Bacteria	Unclass_Bacteria	Unclass_Bacteria	Unclass_Bacteria	Unclass_Bacteria	s__bacterium_RA2114
sk__Bacteria	k__Bacteria	p__Actinobacteria	c__Actinobacteria	o__Actinomycetales	f__Actinomycetaceae	g__Actinomyces	s__Actinomyces_odontolyticus
sk__Bacteria	k__Bacteria	p__Actinobacteria	c__Actinobacteria	o__Corynebacteriales	f__Corynebacteriaceae	g__Corynebacterium	s__Corynebacterium_falsenii
sk__Bacteria	k__Bacteria	p__Actinobacteria	c__Actinobacteria	o__Corynebacteriales	f__Corynebacteriaceae	g__Turicella	s__Turicella_otitidis
sk__Bacteria	k__Bacteria	p__Actinobacteria	c__Actinobacteria	o__Corynebacteriales	f__Gordoniaceae	g__Gordonia	Unclass_Gordonia
sk__Bacteria	k__Bacteria	p__Actinobacteria	c__Actinobacteria	o__Frankiales	f__Frankiaceae	Unclass_Frankiaceae	Unclass_Frankiaceae
sk__Bacteria	k__Bacteria	p__Actinobacteria	c__Actinobacteria	o__Micrococcales	f__Dermacoccaceae	Unclass_Dermacoccaceae	Unclass_Dermacoccaceae
sk__Bacteria	k__Bacteria	p__Actinobacteria	c__Actinobacteria	o__Micrococcales	f__Promicromonosporaceae	Unclass_Promicromonosporaceae	Unclass_Promicromonosporaceae
sk__Bacteria	k__Bacteria	p__Actinobacteria	c__Actinobacteria	o__Propionibacteriales	f__Propionibacteriaceae	g__Tessaracoccus	Unclass_Tessaracoccus
sk__Bacteria	k__Bacteria	p__Bacteroidetes	c__Bacteroidia	o__Bacteroidales	f__Paludibacteraceae	g__Paludibacter	Unclass_Paludibacter
sk__Bacteria	k__Bacteria	p__Bacteroidetes	c__Bacteroidia	o__Bacteroidales	f__Porphyromonadaceae	g__Porphyromonas	s__Porphyromonas_sp._oral_taxon_278
sk__Bacteria	k__Bacteria	p__Bacteroidetes	c__Bacteroidia	o__Marinilabiliales	f__Prolixibacteraceae	Unclass_Prolixibacteraceae	Unclass_Prolixibacteraceae
sk__Bacteria	k__Bacteria	p__Bacteroidetes	c__Cytophagia	o__Cytophagales	f__Cytophagaceae	Unclass_Cytophagaceae	Unclass_Cytophagaceae
sk__Bacteria	k__Bacteria	p__Bacteroidetes	c__Saprospiria	o__Saprospirales	f__Saprospiraceae	Unclass_Saprospiraceae	Unclass_Saprospiraceae
sk__Bacteria	k__Bacteria	p__Candidatus_Saccharibacteria	Unclass_Candidatus_Saccharibacteria	Unclass_Candidatus_Saccharibacteria	Unclass_Candidatus_Saccharibacteria	Unclass_Candidatus_Saccharibacteria	Unclass_Candidatus_Saccharibacteria
sk__Bacteria	k__Bacteria	p__Candidatus_Saccharibacteria	Unclass_Candidatus_Saccharibacteria	Unclass_Candidatus_Saccharibacteria	Unclass_Candidatus_Saccharibacteria	Unclass_Candidatus_Saccharibacteria	s__TM7_phylum_sp._oral_clone_CW040
sk__Bacteria	k__Bacteria	p__Candidatus_Saccharibacteria	Unclass_Candidatus_Saccharibacteria	Unclass_Candidatus_Saccharibacteria	Unclass_Candidatus_Saccharibacteria	g__Candidatus_Saccharimonas	Unclass_Candidatus_Saccharimonas
sk__Bacteria	k__Bacteria	p__Chloroflexi	Unclass_Chloroflexi	Unclass_Chloroflexi	Unclass_Chloroflexi	Unclass_Chloroflexi	Unclass_Chloroflexi
sk__Bacteria	k__Bacteria	p__Deinococcus-Thermus	c__Deinococci	o__Deinococcales	f__Deinococcaceae	Unclass_Deinococcaceae	Unclass_Deinococcaceae
sk__Bacteria	k__Bacteria	p__Firmicutes	c__Bacilli	o__Bacillales	Unclass_Bacillales	g__Gemella	s__Gemella_sanguinis
sk__Bacteria	k__Bacteria	p__Firmicutes	c__Bacilli	o__Bacillales	f__Listeriaceae	g__Listeria	Unclass_Listeria
sk__Bacteria	k__Bacteria	p__Firmicutes	c__Bacilli	o__Bacillales	f__Paenibacillaceae	Unclass_Paenibacillaceae	Unclass_Paenibacillaceae
sk__Bacteria	k__Bacteria	p__Firmicutes	c__Bacilli	o__Bacillales	f__Sporolactobacillaceae	Unclass_Sporolactobacillaceae	Unclass_Sporolactobacillaceae
sk__Bacteria	k__Bacteria	p__Firmicutes	c__Bacilli	o__Lactobacillales	f__Aerococcaceae	g__Abiotrophia	Unclass_Abiotrophia
sk__Bacteria	k__Bacteria	p__Firmicutes	c__Bacilli	o__Lactobacillales	f__Aerococcaceae	g__Abiotrophia	s__Abiotrophia_defectiva
sk__Bacteria	k__Bacteria	p__Firmicutes	c__Bacilli	o__Lactobacillales	f__Aerococcaceae	g__Facklamia	Unclass_Facklamia
sk__Bacteria	k__Bacteria	p__Firmicutes	c__Bacilli	o__Lactobacillales	f__Aerococcaceae	g__Ignavigranum	Unclass_Ignavigranum
sk__Bacteria	k__Bacteria	p__Firmicutes	c__Bacilli	o__Lactobacillales	f__Enterococcaceae	g__Melissococcus	Unclass_Melissococcus
sk__Bacteria	k__Bacteria	p__Firmicutes	c__Bacilli	o__Lactobacillales	f__Enterococcaceae	g__Pilibacter	Unclass_Pilibacter
sk__Bacteria	k__Bacteria	p__Firmicutes	c__Bacilli	o__Lactobacillales	f__Leuconostocaceae	g__Leuconostoc	Unclass_Leuconostoc
sk__Bacteria	k__Bacteria	p__Firmicutes	c__Bacilli	o__Lactobacillales	f__Streptococcaceae	g__Streptococcus	s__Streptococcus_pantholopis
sk__Bacteria	k__Bacteria	p__Firmicutes	c__Bacilli	o__Lactobacillales	f__Streptococcaceae	g__Streptococcus	s__Streptococcus_sp._oral_clone_ASCB12
sk__Bacteria	k__Bacteria	p__Firmicutes	c__Bacilli	o__Lactobacillales	f__Streptococcaceae	g__Streptococcus	s__Streptococcus_sp._oral_taxon_G59
sk__Bacteria	k__Bacteria	p__Firmicutes	c__Clostridia	o__Clostridiales	Unclass_Clostridiales	g__Epulopiscium	Unclass_Epulopiscium
sk__Bacteria	k__Bacteria	p__Firmicutes	c__Clostridia	o__Clostridiales	f__Clostridiales_Family_XIII._Incertae_Sedis	g__Anaerovorax	Unclass_Anaerovorax
sk__Bacteria	k__Bacteria	p__Firmicutes	c__Clostridia	o__Clostridiales	f__Eubacteriaceae	g__Eubacterium	s__Eubacterium_sp._oral_clone_DO016
sk__Bacteria	k__Bacteria	p__Firmicutes	c__Clostridia	o__Clostridiales	f__Lachnospiraceae	g__Johnsonella	Unclass_Johnsonella
sk__Bacteria	k__Bacteria	p__Firmicutes	c__Clostridia	o__Clostridiales	f__Peptococcaceae	Unclass_Peptococcaceae	Unclass_Peptococcaceae
sk__Bacteria	k__Bacteria	p__Firmicutes	c__Clostridia	o__Clostridiales	f__Peptostreptococcaceae	g__Clostridioides	s__Clostridioides_difficile
sk__Bacteria	k__Bacteria	p__Firmicutes	c__Clostridia	o__Halanaerobiales	f__Halanaerobiaceae	g__Halanaerobium	Unclass_Halanaerobium
sk__Bacteria	k__Bacteria	p__Firmicutes	c__Clostridia	o__Halanaerobiales	f__Halobacteroidaceae	Unclass_Halobacteroidaceae	Unclass_Halobacteroidaceae
sk__Bacteria	k__Bacteria	p__Firmicutes	c__Erysipelotrichia	Unclass_Erysipelotrichia	Unclass_Erysipelotrichia	Unclass_Erysipelotrichia	Unclass_Erysipelotrichia
sk__Bacteria	k__Bacteria	p__Firmicutes	c__Negativicutes	o__Selenomonadales	f__Selenomonadaceae	Unclass_Selenomonadaceae	Unclass_Selenomonadaceae
sk__Bacteria	k__Bacteria	p__Firmicutes	c__Negativicutes	o__Veillonellales	f__Veillonellaceae	g__Anaeroglobus	Unclass_Anaeroglobus
sk__Bacteria	k__Bacteria	p__Firmicutes	c__Negativicutes	o__Veillonellales	f__Veillonellaceae	g__Veillonella	s__Veillonella_sp._oral_clone_OH1A
sk__Bacteria	k__Bacteria	p__Firmicutes	c__Tissierellia	o__Tissierellales	f__Peptoniphilaceae	g__Murdochiella	Unclass_Murdochiella
sk__Bacteria	k__Bacteria	p__Ignavibacteriae	c__Ignavibacteria	o__Ignavibacteriales	f__Ignavibacteriaceae	g__Ignavibacterium	Unclass_Ignavibacterium
sk__Bacteria	k__Bacteria	p__Nitrospirae	c__Nitrospira	Unclass_Nitrospira	Unclass_Nitrospira	Unclass_Nitrospira	Unclass_Nitrospira
sk__Bacteria	k__Bacteria	p__Planctomycetes	c__Planctomycetia	o__Planctomycetales	Unclass_Planctomycetales	Unclass_Planctomycetales	Unclass_Planctomycetales
sk__Bacteria	k__Bacteria	p__Proteobacteria	c__Alphaproteobacteria	o__Magnetococcales	f__Magnetococcaceae	g__Magnetococcus	Unclass_Magnetococcus
sk__Bacteria	k__Bacteria	p__Proteobacteria	c__Betaproteobacteria	o__Burkholderiales	f__Oxalobacteraceae	Unclass_Oxalobacteraceae	Unclass_Oxalobacteraceae
sk__Bacteria	k__Bacteria	p__Proteobacteria	c__Betaproteobacteria	o__Burkholderiales	f__Sutterellaceae	Unclass_Sutterellaceae	Unclass_Sutterellaceae
sk__Bacteria	k__Bacteria	p__Proteobacteria	c__Betaproteobacteria	o__Neisseriales	f__Chromobacteriaceae	g__Vogesella	Unclass_Vogesella
sk__Bacteria	k__Bacteria	p__Proteobacteria	c__Deltaproteobacteria	o__Desulfarculales	Unclass_Desulfarculales	Unclass_Desulfarculales	Unclass_Desulfarculales
sk__Bacteria	k__Bacteria	p__Proteobacteria	c__Deltaproteobacteria	o__Desulfobacterales	f__Desulfobacteraceae	Unclass_Desulfobacteraceae	Unclass_Desulfobacteraceae
sk__Bacteria	k__Bacteria	p__Proteobacteria	c__Deltaproteobacteria	o__Desulfovibrionales	f__Desulfovibrionaceae	g__Desulfovibrio	s__Desulfovibrio_putealis
sk__Bacteria	k__Bacteria	p__Proteobacteria	c__Deltaproteobacteria	o__Myxococcales	f__Sandaracinaceae	Unclass_Sandaracinaceae	Unclass_Sandaracinaceae
sk__Bacteria	k__Bacteria	p__Proteobacteria	c__Epsilonproteobacteria	o__Campylobacterales	Unclass_Campylobacterales	Unclass_Campylobacterales	Unclass_Campylobacterales
sk__Bacteria	k__Bacteria	p__Proteobacteria	c__Gammaproteobacteria	o__Alteromonadales	f__Alteromonadaceae	g__Marinobacter	Unclass_Marinobacter
sk__Bacteria	k__Bacteria	p__Proteobacteria	c__Gammaproteobacteria	o__Enterobacterales	f__Enterobacteriaceae	g__Escherichia	s__Escherichia_albertii
sk__Bacteria	k__Bacteria	p__Proteobacteria	c__Gammaproteobacteria	o__Enterobacterales	f__Enterobacteriaceae	g__Franconibacter	s__Franconibacter_pulveris
sk__Bacteria	k__Bacteria	p__Proteobacteria	c__Gammaproteobacteria	o__Enterobacterales	f__Enterobacteriaceae	g__Shigella	Unclass_Shigella
sk__Bacteria	k__Bacteria	p__Proteobacteria	c__Gammaproteobacteria	o__Enterobacterales	f__Erwiniaceae	g__Pantoea	Unclass_Pantoea
sk__Bacteria	k__Bacteria	p__Proteobacteria	c__Gammaproteobacteria	o__Enterobacterales	f__Yersiniaceae	g__Serratia	s__Serratia_marcescens
sk__Bacteria	k__Bacteria	p__Proteobacteria	c__Gammaproteobacteria	o__Legionellales	f__Coxiellaceae	g__Coxiella	Unclass_Coxiella
sk__Bacteria	k__Bacteria	p__Proteobacteria	c__Oligoflexia	o__Bacteriovoracales	f__Bacteriovoracaceae	Unclass_Bacteriovoracaceae	Unclass_Bacteriovoracaceae
sk__Bacteria	k__Bacteria	p__Tenericutes	c__Mollicutes	o__Mycoplasmatales	Unclass_Mycoplasmatales	Unclass_Mycoplasmatales	Unclass_Mycoplasmatales
sk__Bacteria	k__Bacteria	p__Tenericutes	c__Mollicutes	o__Mycoplasmatales	f__Mycoplasmataceae	Unclass_Mycoplasmataceae	Unclass_Mycoplasmataceae
sk__Bacteria	k__Bacteria	p__Tenericutes	c__Mollicutes	o__Mycoplasmatales	f__Mycoplasmataceae	g__Varibaculum	Unclass_Ureaplasma
sk__Bacteria	k__Bacteria	p__Verrucomicrobia	Unclass_Verrucomicrobia	Unclass_Verrucomicrobia	Unclass_Verrucomicrobia	Unclass_Verrucomicrobia	Unclass_Verrucomicrobia
sk__Eukaryota	k__Eukaryota	Unclass_Eukaryota	Unclass_Eukaryota	o__Cercomonadida	f__Cercomonadidae	g__Paracercomonas	Unclass_Paracercomonas
sk__Eukaryota	k__Eukaryota	Unclass_Eukaryota	c__Chrysophyceae	Unclass_Chrysophyceae	Unclass_Chrysophyceae	Unclass_Chrysophyceae	s__Spumella-like_flagellate_JBAF33
sk__Eukaryota	k__Eukaryota	Unclass_Eukaryota	c__Chrysophyceae	o__Chromulinales	f__Chromulinaceae	g__Ochromonas	Unclass_Ochromonas
sk__Eukaryota	k__Eukaryota	Unclass_Eukaryota	c__Colpodea	o__Cyrtolophosidida	f__Cyrtolophosididae	g__Cyrtolophosis	Unclass_Cyrtolophosis
sk__Eukaryota	k__Eukaryota	Unclass_Eukaryota	c__Oligohymenophorea	o__Peniculida	f__Parameciidae	g__Paramecium	Unclass_Paramecium
sk__Eukaryota	k__Eukaryota	Unclass_Eukaryota	c__Spirotrichea	o__Sporadotrichida	f__Oxytrichidae	g__Stylonychia	s__Stylonychia_sp._StyloJ3
sk__Eukaryota	k__Fungi	p__Chytridiomycota	c__Chytridiomycetes	o__Lobulomycetales	Unclass_Lobulomycetales	Unclass_Lobulomycetales	Unclass_Lobulomycetales
sk__Bacteria	k__Bacteria	Unclass_Bacteria	Unclass_Bacteria	Unclass_Bacteria	Unclass_Bacteria	Unclass_Bacteria	s__bacterium_NLAE-zl-G149
sk__Bacteria	k__Bacteria	Unclass_Bacteria	Unclass_Bacteria	Unclass_Bacteria	Unclass_Bacteria	Unclass_Bacteria	s__bacterium_NLAE-zl-G433
sk__Bacteria	k__Bacteria	Unclass_Bacteria	Unclass_Bacteria	Unclass_Bacteria	Unclass_Bacteria	Unclass_Bacteria	s__bacterium_NLAE-zl-G89
sk__Bacteria	k__Bacteria	Unclass_Bacteria	Unclass_Bacteria	Unclass_Bacteria	Unclass_Bacteria	Unclass_Bacteria	s__bacterium_YE64
sk__Bacteria	k__Bacteria	p__Acidobacteria	c__Acidobacteriia	Unclass_Acidobacteriia	Unclass_Acidobacteriia	Unclass_Acidobacteriia	Unclass_Acidobacteriia
sk__Bacteria	k__Bacteria	p__Actinobacteria	c__Actinobacteria	o__Actinomycetales	f__Actinomycetaceae	g__Varibaculum	Unclass_Varibaculum
sk__Bacteria	k__Bacteria	p__Actinobacteria	c__Actinobacteria	o__Corynebacteriales	Unclass_Corynebacteriales	g__Lawsonella	Unclass_Lawsonella
sk__Bacteria	k__Bacteria	p__Actinobacteria	c__Actinobacteria	o__Corynebacteriales	f__Williamsiaceae	g__Williamsia	Unclass_Williamsia
sk__Bacteria	k__Bacteria	p__Actinobacteria	c__Actinobacteria	o__Frankiales	Unclass_Frankiales	Unclass_Frankiales	Unclass_Frankiales
sk__Bacteria	k__Bacteria	p__Actinobacteria	c__Actinobacteria	o__Micrococcales	f__Dermabacteraceae	Unclass_Dermabacteraceae	Unclass_Dermabacteraceae
sk__Bacteria	k__Bacteria	p__Actinobacteria	c__Actinobacteria	o__Micrococcales	f__Micrococcaceae	g__Arthrobacter	Unclass_Arthrobacter
sk__Bacteria	k__Bacteria	p__Actinobacteria	c__Actinobacteria	o__Pseudonocardiales	f__Pseudonocardiaceae	g__Saccharopolyspora	Unclass_Saccharopolyspora
sk__Bacteria	k__Bacteria	p__Bacteroidetes	c__Flavobacteriia	Unclass_Flavobacteriia	Unclass_Flavobacteriia	Unclass_Flavobacteriia	Unclass_Flavobacteriia
sk__Bacteria	k__Bacteria	p__Bacteroidetes	c__Flavobacteriia	o__Flavobacteriales	f__Flavobacteriaceae	g__Flavobacterium	Unclass_Flavobacterium
sk__Bacteria	k__Bacteria	p__Bacteroidetes	c__Flavobacteriia	o__Flavobacteriales	f__Flavobacteriaceae	g__Moheibacter	Unclass_Moheibacter
sk__Bacteria	k__Bacteria	p__Deferribacteres	Unclass_Deferribacteres	Unclass_Deferribacteres	Unclass_Deferribacteres	Unclass_Deferribacteres	Unclass_Deferribacteres
sk__Bacteria	k__Bacteria	p__Fibrobacteres	c__Fibrobacteria	o__Fibrobacterales	f__Fibrobacteraceae	Unclass_Fibrobacteraceae	Unclass_Fibrobacteraceae
sk__Bacteria	k__Bacteria	p__Firmicutes	c__Bacilli	o__Lactobacillales	f__Streptococcaceae	g__Streptococcus	s__Streptococcus_equinus
sk__Bacteria	k__Bacteria	p__Firmicutes	c__Clostridia	o__Clostridiales	f__Clostridiaceae	g__Alkaliphilus	Unclass_Alkaliphilus
sk__Bacteria	k__Bacteria	p__Firmicutes	c__Clostridia	o__Clostridiales	f__Eubacteriaceae	g__Acetobacterium	Unclass_Acetobacterium
sk__Bacteria	k__Bacteria	p__Firmicutes	c__Clostridia	o__Clostridiales	f__Peptococcaceae	g__Desulfosporosinus	Unclass_Desulfosporosinus
sk__Bacteria	k__Bacteria	p__Firmicutes	c__Clostridia	o__Clostridiales	f__Ruminococcaceae	g__Anaerotruncus	Unclass_Anaerotruncus
sk__Bacteria	k__Bacteria	p__Firmicutes	c__Negativicutes	o__Selenomonadales	Unclass_Selenomonadales	Unclass_Selenomonadales	Unclass_Selenomonadales
sk__Bacteria	k__Bacteria	p__Firmicutes	c__Negativicutes	o__Veillonellales	f__Veillonellaceae	g__Negativicoccus	Unclass_Negativicoccus
sk__Bacteria	k__Bacteria	p__Firmicutes	c__Tissierellia	o__Tissierellales	f__Peptoniphilaceae	g__Anaerococcus	s__Anaerococcus_sp._S138
sk__Bacteria	k__Bacteria	p__Planctomycetes	c__Planctomycetia	o__Planctomycetales	f__Gemmataceae	Unclass_Gemmataceae	Unclass_Gemmataceae
sk__Bacteria	k__Bacteria	p__Planctomycetes	c__Planctomycetia	o__Planctomycetales	f__Gemmataceae	g__Fimbriiglobus	Unclass_Fimbriiglobus
sk__Bacteria	k__Bacteria	p__Proteobacteria	c__Alphaproteobacteria	o__Rhodobacterales	Unclass_Rhodobacterales	Unclass_Rhodobacterales	Unclass_Rhodobacterales
sk__Bacteria	k__Bacteria	p__Proteobacteria	c__Alphaproteobacteria	o__Rhodospirillales	f__Rhodospirillaceae	Unclass_Rhodospirillaceae	Unclass_Rhodospirillaceae
sk__Bacteria	k__Bacteria	p__Proteobacteria	c__Deltaproteobacteria	o__Myxococcales	f__Kofleriaceae	g__Haliangium	Unclass_Haliangium
sk__Bacteria	k__Bacteria	p__Proteobacteria	c__Gammaproteobacteria	Unclass_Gammaproteobacteria	Unclass_Gammaproteobacteria	Unclass_Gammaproteobacteria	s__gamma_proteobacterium_symbiont_of_Menida_musiva
sk__Bacteria	k__Bacteria	p__Proteobacteria	c__Gammaproteobacteria	o__Alteromonadales	f__Pseudoalteromonadaceae	Unclass_Pseudoalteromonadaceae	Unclass_Pseudoalteromonadaceae
sk__Bacteria	k__Bacteria	p__Proteobacteria	c__Gammaproteobacteria	o__Cellvibrionales	f__Microbulbiferaceae	Unclass_Microbulbiferaceae	Unclass_Microbulbiferaceae
sk__Bacteria	k__Bacteria	p__Proteobacteria	c__Gammaproteobacteria	o__Enterobacterales	f__Enterobacteriaceae	g__Enterobacter	Unclass_Enterobacter
sk__Bacteria	k__Bacteria	p__Proteobacteria	c__Gammaproteobacteria	o__Enterobacterales	f__Enterobacteriaceae	g__Klebsiella	s__Klebsiella_pneumoniae
sk__Bacteria	k__Bacteria	p__Proteobacteria	c__Gammaproteobacteria	o__Enterobacterales	f__Enterobacteriaceae	g__Salmonella	Unclass_Salmonella
sk__Bacteria	k__Bacteria	p__Proteobacteria	c__Gammaproteobacteria	o__Enterobacterales	f__Erwiniaceae	g__Erwinia	Unclass_Erwinia
sk__Bacteria	k__Bacteria	p__Proteobacteria	c__Gammaproteobacteria	o__Enterobacterales	f__Erwiniaceae	g__Pantoea	s__Pantoea_agglomerans
sk__Bacteria	k__Bacteria	p__Proteobacteria	c__Gammaproteobacteria	o__Enterobacterales	f__Morganellaceae	g__Proteus	Unclass_Proteus
sk__Bacteria	k__Bacteria	p__Proteobacteria	c__Gammaproteobacteria	o__Enterobacterales	f__Pectobacteriaceae	g__Brenneria	s__Brenneria_sp._DAFNE_Bnig-1
sk__Bacteria	k__Bacteria	p__Proteobacteria	c__Gammaproteobacteria	o__Enterobacterales	f__Pectobacteriaceae	g__Sodalis	Unclass_Sodalis
sk__Bacteria	k__Bacteria	p__Proteobacteria	c__Gammaproteobacteria	o__Oceanospirillales	f__Hahellaceae	g__Hahella	s__Hahella_ganghwensis
sk__Bacteria	k__Bacteria	p__Proteobacteria	c__Gammaproteobacteria	o__Oceanospirillales	f__Saccharospirillaceae	Unclass_Saccharospirillaceae	Unclass_Saccharospirillaceae
sk__Bacteria	k__Bacteria	p__Proteobacteria	c__Gammaproteobacteria	o__Pasteurellales	f__Pasteurellaceae	g__Haemophilus	s__Haemophilus_parainfluenzae
sk__Bacteria	k__Bacteria	p__Proteobacteria	c__Gammaproteobacteria	o__Pasteurellales	f__Pasteurellaceae	g__Phocoenobacter	Unclass_Phocoenobacter
sk__Bacteria	k__Bacteria	p__Proteobacteria	c__Gammaproteobacteria	o__Pseudomonadales	f__Moraxellaceae	g__Perlucidibaca	Unclass_Perlucidibaca
sk__Bacteria	k__Bacteria	p__Proteobacteria	c__Gammaproteobacteria	o__Xanthomonadales	f__Rhodanobacteraceae	Unclass_Rhodanobacteraceae	Unclass_Rhodanobacteraceae
sk__Bacteria	k__Bacteria	p__Proteobacteria	c__Gammaproteobacteria	o__Xanthomonadales	f__Xanthomonadaceae	g__Luteimonas	Unclass_Luteimonas
sk__Eukaryota	k__Eukaryota	Unclass_Eukaryota	Unclass_Eukaryota	o__Arcellinida	f__Arcellidae	g__Arcella	s__Arcella_hemisphaerica
sk__Eukaryota	k__Eukaryota	Unclass_Eukaryota	c__Colpodea	Unclass_Colpodea	Unclass_Colpodea	Unclass_Colpodea	Unclass_Colpodea
sk__Eukaryota	k__Eukaryota	Unclass_Eukaryota	c__Dinophyceae	Unclass_Dinophyceae	Unclass_Dinophyceae	Unclass_Dinophyceae	Unclass_Dinophyceae
sk__Eukaryota	k__Metazoa	Unclass_Metazoa	Unclass_Metazoa	Unclass_Metazoa	Unclass_Metazoa	Unclass_Metazoa	Unclass_Metazoa
sk__Eukaryota	k__Viridiplantae	p__Chlorophyta	c__Chlorophyceae	Unclass_Chlorophyceae	Unclass_Chlorophyceae	Unclass_Chlorophyceae	Unclass_Chlorophyceae
sk__Archaea	k__Archaea	p__Thaumarchaeota	Unclass_Thaumarchaeota	Unclass_Thaumarchaeota	Unclass_Thaumarchaeota	g__Candidatus_Nitrosotenuis	Unclass_Candidatus_Nitrosotenuis
sk__Bacteria	k__Bacteria	Unclass_Bacteria	Unclass_Bacteria	Unclass_Bacteria	Unclass_Bacteria	Unclass_Bacteria	s__bacterium_NLAE-zl-H381
sk__Bacteria	k__Bacteria	Unclass_Bacteria	Unclass_Bacteria	o__Haloplasmatales	Unclass_Haloplasmatales	Unclass_Haloplasmatales	Unclass_Haloplasmatales
sk__Bacteria	k__Bacteria	p__Acidobacteria	c__Acidobacteriia	o__Acidobacteriales	Unclass_Acidobacteriales	Unclass_Acidobacteriales	Unclass_Acidobacteriales
sk__Bacteria	k__Bacteria	p__Acidobacteria	c__Solibacteres	o__Solibacterales	Unclass_Solibacterales	Unclass_Solibacterales	Unclass_Solibacterales
sk__Bacteria	k__Bacteria	p__Acidobacteria	c__Solibacteres	o__Solibacterales	f__Bryobacteraceae	g__Bryobacter	Unclass_Bryobacter
sk__Bacteria	k__Bacteria	p__Actinobacteria	c__Actinobacteria	o__Bifidobacteriales	f__Bifidobacteriaceae	g__Bifidobacterium	s__Bifidobacterium_longum
sk__Bacteria	k__Bacteria	p__Actinobacteria	c__Actinobacteria	o__Bifidobacteriales	f__Bifidobacteriaceae	g__Bifidobacterium	s__Bifidobacterium_ramosum
sk__Bacteria	k__Bacteria	p__Actinobacteria	c__Actinobacteria	o__Corynebacteriales	f__Corynebacteriaceae	g__Corynebacterium	s__Corynebacterium_bovis
sk__Bacteria	k__Bacteria	p__Actinobacteria	c__Actinobacteria	o__Corynebacteriales	f__Corynebacteriaceae	g__Corynebacterium	s__Corynebacterium_sp._NML_98-0116
sk__Bacteria	k__Bacteria	p__Actinobacteria	c__Actinobacteria	o__Micrococcales	f__Microbacteriaceae	g__Aurantimicrobium	Unclass_Aurantimicrobium
sk__Bacteria	k__Bacteria	p__Actinobacteria	c__Actinobacteria	o__Micrococcales	f__Microbacteriaceae	g__Huakuichenia	Unclass_Huakuichenia
sk__Bacteria	k__Bacteria	p__Actinobacteria	c__Actinobacteria	o__Propionibacteriales	f__Propionibacteriaceae	g__Propionimicrobium	Unclass_Propionimicrobium
sk__Bacteria	k__Bacteria	p__Actinobacteria	c__Rubrobacteria	o__Rubrobacterales	Unclass_Rubrobacterales	Unclass_Rubrobacterales	Unclass_Rubrobacterales
sk__Bacteria	k__Bacteria	p__Bacteroidetes	c__Chitinophagia	o__Chitinophagales	Unclass_Chitinophagales	Unclass_Chitinophagales	Unclass_Chitinophagales
sk__Bacteria	k__Bacteria	p__Bacteroidetes	c__Cytophagia	o__Cytophagales	f__Cytophagaceae	g__Emticicia	Unclass_Emticicia
sk__Bacteria	k__Bacteria	p__Bacteroidetes	c__Flavobacteriia	o__Flavobacteriales	f__Flavobacteriaceae	g__Cloacibacterium	Unclass_Cloacibacterium
sk__Bacteria	k__Bacteria	p__Chlamydiae	c__Chlamydiia	o__Chlamydiales	Unclass_Chlamydiales	Unclass_Chlamydiales	Unclass_Chlamydiales
sk__Bacteria	k__Bacteria	p__Elusimicrobia	c__Elusimicrobia	Unclass_Elusimicrobia	Unclass_Elusimicrobia	Unclass_Elusimicrobia	Unclass_Elusimicrobia
sk__Bacteria	k__Bacteria	p__Firmicutes	c__Bacilli	o__Bacillales	f__Listeriaceae	g__Listeria	s__Listeria_floridensis
sk__Bacteria	k__Bacteria	p__Firmicutes	c__Bacilli	o__Bacillales	f__Staphylococcaceae	g__Salinicoccus	Unclass_Salinicoccus
sk__Bacteria	k__Bacteria	p__Firmicutes	c__Bacilli	o__Lactobacillales	f__Enterococcaceae	g__Enterococcus	s__Enterococcus_faecium
sk__Bacteria	k__Bacteria	p__Firmicutes	c__Bacilli	o__Lactobacillales	f__Enterococcaceae	g__Enterococcus	s__Enterococcus_xinjiangensis
sk__Bacteria	k__Bacteria	p__Firmicutes	c__Bacilli	o__Lactobacillales	f__Streptococcaceae	g__Streptococcus	s__Streptococcus_didelphis
sk__Bacteria	k__Bacteria	p__Firmicutes	c__Bacilli	o__Lactobacillales	f__Streptococcaceae	g__Streptococcus	s__Streptococcus_parasuis
sk__Bacteria	k__Bacteria	p__Firmicutes	c__Clostridia	o__Clostridiales	f__Clostridiaceae	g__Proteiniclasticum	Unclass_Proteiniclasticum
sk__Bacteria	k__Bacteria	p__Firmicutes	c__Clostridia	o__Clostridiales	f__Ruminococcaceae	g__Ethanoligenens	Unclass_Ethanoligenens
sk__Bacteria	k__Bacteria	p__Firmicutes	c__Clostridia	o__Clostridiales	f__Ruminococcaceae	g__Ruminococcus	s__Ruminococcus_sp._CE2
sk__Bacteria	k__Bacteria	p__Firmicutes	c__Clostridia	o__Clostridiales	f__Syntrophomonadaceae	Unclass_Syntrophomonadaceae	Unclass_Syntrophomonadaceae
sk__Bacteria	k__Bacteria	p__Firmicutes	c__Negativicutes	o__Selenomonadales	f__Sporomusaceae	Unclass_Sporomusaceae	Unclass_Sporomusaceae
sk__Bacteria	k__Bacteria	p__Firmicutes	c__Tissierellia	Unclass_Tissierellia	Unclass_Tissierellia	g__Ezakiella	Unclass_Ezakiella
sk__Bacteria	k__Bacteria	p__Firmicutes	c__Tissierellia	o__Tissierellales	f__Peptoniphilaceae	g__Anaerococcus	s__Anaerococcus_prevotii
sk__Bacteria	k__Bacteria	p__Firmicutes	c__Tissierellia	o__Tissierellales	f__Peptoniphilaceae	g__Anaerococcus	s__Anaerococcus_sp._S194
sk__Bacteria	k__Bacteria	p__Firmicutes	c__Tissierellia	o__Tissierellales	f__Peptoniphilaceae	g__Gallicola	Unclass_Gallicola
sk__Bacteria	k__Bacteria	p__Firmicutes	c__Tissierellia	o__Tissierellales	f__Peptoniphilaceae	g__Helcococcus	Unclass_Helcococcus
sk__Bacteria	k__Bacteria	p__Kiritimatiellaeota	c__Kiritimatiellae	Unclass_Kiritimatiellae	Unclass_Kiritimatiellae	Unclass_Kiritimatiellae	Unclass_Kiritimatiellae
sk__Bacteria	k__Bacteria	p__Proteobacteria	c__Acidithiobacillia	Unclass_Acidithiobacillia	Unclass_Acidithiobacillia	Unclass_Acidithiobacillia	Unclass_Acidithiobacillia
sk__Bacteria	k__Bacteria	p__Proteobacteria	c__Alphaproteobacteria	o__Rhizobiales	f__Beijerinckiaceae	Unclass_Beijerinckiaceae	Unclass_Beijerinckiaceae
sk__Bacteria	k__Bacteria	p__Proteobacteria	c__Alphaproteobacteria	o__Sneathiellales	f__Sneathiellaceae	Unclass_Sneathiellaceae	Unclass_Sneathiellaceae
sk__Bacteria	k__Bacteria	p__Proteobacteria	c__Betaproteobacteria	o__Burkholderiales	f__Burkholderiaceae	g__Limnobacter	Unclass_Limnobacter
sk__Bacteria	k__Bacteria	p__Proteobacteria	c__Betaproteobacteria	o__Rhodocyclales	f__Azonexaceae	g__Dechloromonas	Unclass_Dechloromonas
sk__Bacteria	k__Bacteria	p__Proteobacteria	c__Betaproteobacteria	o__Rhodocyclales	f__Rhodocyclaceae	g__Propionivibrio	Unclass_Propionivibrio
sk__Bacteria	k__Bacteria	p__Proteobacteria	c__Deltaproteobacteria	o__Desulfobacterales	Unclass_Desulfobacterales	Unclass_Desulfobacterales	Unclass_Desulfobacterales
sk__Bacteria	k__Bacteria	p__Proteobacteria	c__Gammaproteobacteria	Unclass_Gammaproteobacteria	Unclass_Gammaproteobacteria	g__Acidibacter	Unclass_Acidibacter
sk__Bacteria	k__Bacteria	p__Proteobacteria	c__Gammaproteobacteria	o__Enterobacterales	f__Erwiniaceae	g__Erwinia	s__Erwinia_teleogrylli
sk__Bacteria	k__Bacteria	p__Proteobacteria	c__Gammaproteobacteria	o__Enterobacterales	f__Erwiniaceae	g__Pantoea	s__Pantoea_conspicua
sk__Bacteria	k__Bacteria	p__Proteobacteria	c__Hydrogenophilalia	Unclass_Hydrogenophilalia	Unclass_Hydrogenophilalia	Unclass_Hydrogenophilalia	Unclass_Hydrogenophilalia
sk__Bacteria	k__Bacteria	p__Proteobacteria	c__Oligoflexia	o__Bacteriovoracales	Unclass_Bacteriovoracales	Unclass_Bacteriovoracales	Unclass_Bacteriovoracales
sk__Bacteria	k__Bacteria	p__Verrucomicrobia	c__Opitutae	o__Puniceicoccales	Unclass_Puniceicoccales	Unclass_Puniceicoccales	Unclass_Puniceicoccales
sk__Archaea	k__Archaea	p__Euryarchaeota	c__Halobacteria	o__Halobacteriales	Unclass_Halobacteriales	Unclass_Halobacteriales	Unclass_Halobacteriales
sk__Archaea	k__Archaea	p__Euryarchaeota	c__Methanobacteria	o__Methanobacteriales	f__Methanobacteriaceae	g__Methanobrevibacter	s__Methanobrevibacter_oralis
sk__Bacteria	k__Bacteria	Unclass_Bacteria	Unclass_Bacteria	o__Haloplasmatales	f__Haloplasmataceae	Unclass_Haloplasmataceae	Unclass_Haloplasmataceae
sk__Bacteria	k__Bacteria	p__Actinobacteria	c__Actinobacteria	o__Actinomycetales	f__Actinomycetaceae	g__Actinomyces	s__Actinomyces_graevenitzii
sk__Bacteria	k__Bacteria	p__Actinobacteria	c__Actinobacteria	o__Bifidobacteriales	f__Bifidobacteriaceae	g__Bifidobacterium	s__Bifidobacterium_saeculare
sk__Bacteria	k__Bacteria	p__Actinobacteria	c__Actinobacteria	o__Corynebacteriales	Unclass_Corynebacteriales	g__Lawsonella	s__Lawsonella_clevelandensis
sk__Bacteria	k__Bacteria	p__Actinobacteria	c__Actinobacteria	o__Corynebacteriales	f__Corynebacteriaceae	g__Corynebacterium	s__Corynebacterium_glaucum
sk__Bacteria	k__Bacteria	p__Actinobacteria	c__Actinobacteria	o__Corynebacteriales	f__Corynebacteriaceae	g__Corynebacterium	s__Corynebacterium_sp._1938BRRJ
sk__Bacteria	k__Bacteria	p__Actinobacteria	c__Actinobacteria	o__Corynebacteriales	f__Corynebacteriaceae	g__Corynebacterium	s__Corynebacterium_sp._3210O2
sk__Bacteria	k__Bacteria	p__Actinobacteria	c__Actinobacteria	o__Corynebacteriales	f__Corynebacteriaceae	g__Corynebacterium	s__Corynebacterium_sp._NML_080024
sk__Bacteria	k__Bacteria	p__Actinobacteria	c__Actinobacteria	o__Corynebacteriales	f__Mycobacteriaceae	Unclass_Mycobacteriaceae	Unclass_Mycobacteriaceae
sk__Bacteria	k__Bacteria	p__Actinobacteria	c__Actinobacteria	o__Corynebacteriales	f__Nocardiaceae	g__Nocardia	Unclass_Nocardia
sk__Bacteria	k__Bacteria	p__Actinobacteria	c__Actinobacteria	o__Corynebacteriales	f__Tsukamurellaceae	Unclass_Tsukamurellaceae	Unclass_Tsukamurellaceae
sk__Bacteria	k__Bacteria	p__Actinobacteria	c__Actinobacteria	o__Frankiales	f__Cryptosporangiaceae	Unclass_Cryptosporangiaceae	Unclass_Cryptosporangiaceae
sk__Bacteria	k__Bacteria	p__Actinobacteria	c__Actinobacteria	o__Micrococcales	f__Micrococcaceae	g__Rothia	s__Rothia_dentocariosa
sk__Bacteria	k__Bacteria	p__Actinobacteria	c__Actinobacteria	o__Micromonosporales	f__Micromonosporaceae	Unclass_Micromonosporaceae	Unclass_Micromonosporaceae
sk__Bacteria	k__Bacteria	p__Actinobacteria	c__Actinobacteria	o__Propionibacteriales	f__Nocardioidaceae	Unclass_Nocardioidaceae	Unclass_Nocardioidaceae
sk__Bacteria	k__Bacteria	p__Actinobacteria	c__Actinobacteria	o__Propionibacteriales	f__Propionibacteriaceae	g__Pseudopropionibacterium	Unclass_Pseudopropionibacterium
sk__Bacteria	k__Bacteria	p__Bacteroidetes	c__Bacteroidia	o__Bacteroidales	f__Bacteroidaceae	g__Bacteroides	s__Bacteroides_plebeius
sk__Bacteria	k__Bacteria	p__Bacteroidetes	c__Bacteroidia	o__Bacteroidales	f__Barnesiellaceae	g__Barnesiella	Unclass_Barnesiella
sk__Bacteria	k__Bacteria	p__Bacteroidetes	c__Bacteroidia	o__Bacteroidales	f__Odoribacteraceae	g__Culturomica	Unclass_Culturomica
sk__Bacteria	k__Bacteria	p__Bacteroidetes	c__Bacteroidia	o__Bacteroidales	f__Tannerellaceae	Unclass_Tannerellaceae	Unclass_Tannerellaceae
sk__Bacteria	k__Bacteria	p__Bacteroidetes	c__Cytophagia	o__Cytophagales	f__Cyclobacteriaceae	Unclass_Cyclobacteriaceae	Unclass_Cyclobacteriaceae
sk__Bacteria	k__Bacteria	p__Bacteroidetes	c__Saprospiria	o__Saprospirales	Unclass_Saprospirales	Unclass_Saprospirales	Unclass_Saprospirales
sk__Bacteria	k__Bacteria	p__Candidatus_Latescibacteria	Unclass_Candidatus_Latescibacteria	Unclass_Candidatus_Latescibacteria	Unclass_Candidatus_Latescibacteria	Unclass_Candidatus_Latescibacteria	Unclass_Candidatus_Latescibacteria
sk__Bacteria	k__Bacteria	p__Candidatus_Saccharibacteria	Unclass_Candidatus_Saccharibacteria	Unclass_Candidatus_Saccharibacteria	Unclass_Candidatus_Saccharibacteria	Unclass_Candidatus_Saccharibacteria	s__TM7_phylum_sp._canine_oral_taxon_308
sk__Bacteria	k__Bacteria	p__Candidatus_Saccharibacteria	Unclass_Candidatus_Saccharibacteria	Unclass_Candidatus_Saccharibacteria	Unclass_Candidatus_Saccharibacteria	Unclass_Candidatus_Saccharibacteria	s__TM7_phylum_sp._oral_clone_BU080
sk__Bacteria	k__Bacteria	p__Chlamydiae	c__Chlamydiia	o__Parachlamydiales	f__Parachlamydiaceae	Unclass_Parachlamydiaceae	Unclass_Parachlamydiaceae
sk__Bacteria	k__Bacteria	p__Chloroflexi	c__Caldilineae	o__Caldilineales	f__Caldilineaceae	Unclass_Caldilineaceae	Unclass_Caldilineaceae
sk__Bacteria	k__Bacteria	p__Chloroflexi	c__Dehalococcoidia	Unclass_Dehalococcoidia	Unclass_Dehalococcoidia	Unclass_Dehalococcoidia	Unclass_Dehalococcoidia
sk__Bacteria	k__Bacteria	p__Chloroflexi	c__Thermomicrobia	o__Thermomicrobiales	Unclass_Thermomicrobiales	Unclass_Thermomicrobiales	Unclass_Thermomicrobiales
sk__Bacteria	k__Bacteria	p__Elusimicrobia	Unclass_Elusimicrobia	Unclass_Elusimicrobia	Unclass_Elusimicrobia	Unclass_Elusimicrobia	Unclass_Elusimicrobia
sk__Bacteria	k__Bacteria	p__Firmicutes	Unclass_Firmicutes	Unclass_Firmicutes	Unclass_Firmicutes	g__Hydrogenispora	Unclass_Hydrogenispora
sk__Bacteria	k__Bacteria	p__Firmicutes	c__Bacilli	o__Lactobacillales	f__Carnobacteriaceae	g__Atopococcus	Unclass_Atopococcus
sk__Bacteria	k__Bacteria	p__Firmicutes	c__Bacilli	o__Lactobacillales	f__Enterococcaceae	g__Catellicoccus	Unclass_Catellicoccus
sk__Bacteria	k__Bacteria	p__Firmicutes	c__Bacilli	o__Lactobacillales	f__Streptococcaceae	g__Streptococcus	s__Streptococcus_sanguinis
sk__Bacteria	k__Bacteria	p__Firmicutes	c__Bacilli	o__Lactobacillales	f__Streptococcaceae	g__Streptococcus	s__Streptococcus_sinensis
sk__Bacteria	k__Bacteria	p__Firmicutes	c__Bacilli	o__Lactobacillales	f__Streptococcaceae	g__Streptococcus	s__Streptococcus_sp._DD04(2016)
sk__Bacteria	k__Bacteria	p__Firmicutes	c__Bacilli	o__Lactobacillales	f__Streptococcaceae	g__Streptococcus	s__Streptococcus_sp._XJ149-N3-2
sk__Bacteria	k__Bacteria	p__Firmicutes	c__Bacilli	o__Lactobacillales	f__Streptococcaceae	g__Streptococcus	s__Streptococcus_vestibularis
sk__Bacteria	k__Bacteria	p__Firmicutes	c__Clostridia	o__Clostridiales	Unclass_Clostridiales	g__Fenollaria	s__Fenollaria_timonensis
sk__Bacteria	k__Bacteria	p__Firmicutes	c__Clostridia	o__Clostridiales	Unclass_Clostridiales	g__Neofamilia	Unclass_Neofamilia
sk__Bacteria	k__Bacteria	p__Firmicutes	c__Clostridia	o__Clostridiales	Unclass_Clostridiales	g__Neofamilia	s__Neofamilia_massiliensis
sk__Bacteria	k__Bacteria	p__Firmicutes	c__Clostridia	o__Clostridiales	f__Clostridiaceae	g__Sarcina	Unclass_Sarcina
sk__Bacteria	k__Bacteria	p__Firmicutes	c__Clostridia	o__Clostridiales	f__Eubacteriaceae	g__Eubacterium	s__Eubacterium_sp._oral_clone_FX028
sk__Bacteria	k__Bacteria	p__Firmicutes	c__Clostridia	o__Clostridiales	f__Lachnospiraceae	g__Dorea	s__Dorea_formicigenerans
sk__Bacteria	k__Bacteria	p__Firmicutes	c__Clostridia	o__Clostridiales	f__Peptostreptococcaceae	g__Acetoanaerobium	Unclass_Acetoanaerobium
sk__Bacteria	k__Bacteria	p__Firmicutes	c__Clostridia	o__Halanaerobiales	Unclass_Halanaerobiales	Unclass_Halanaerobiales	Unclass_Halanaerobiales
sk__Bacteria	k__Bacteria	p__Firmicutes	c__Erysipelotrichia	o__Erysipelotrichales	f__Erysipelotrichaceae	g__Bulleidia	Unclass_Bulleidia
sk__Bacteria	k__Bacteria	p__Firmicutes	c__Erysipelotrichia	o__Erysipelotrichales	f__Erysipelotrichaceae	g__Candidatus_Stoquefichus	Unclass_Candidatus_Stoquefichus
sk__Bacteria	k__Bacteria	p__Firmicutes	c__Erysipelotrichia	o__Erysipelotrichales	f__Erysipelotrichaceae	g__Coprobacillus	Unclass_Coprobacillus
sk__Bacteria	k__Bacteria	p__Firmicutes	c__Erysipelotrichia	o__Erysipelotrichales	f__Erysipelotrichaceae	g__Erysipelatoclostridium	Unclass_Erysipelatoclostridium
sk__Bacteria	k__Bacteria	p__Firmicutes	c__Erysipelotrichia	o__Erysipelotrichales	f__Erysipelotrichaceae	g__Erysipelothrix	s__Erysipelothrix_larvae
sk__Bacteria	k__Bacteria	p__Firmicutes	c__Limnochordia	o__Limnochordales	Unclass_Limnochordales	Unclass_Limnochordales	Unclass_Limnochordales
sk__Bacteria	k__Bacteria	p__Firmicutes	c__Tissierellia	Unclass_Tissierellia	Unclass_Tissierellia	g__Sedimentibacter	Unclass_Sedimentibacter
sk__Bacteria	k__Bacteria	p__Firmicutes	c__Tissierellia	o__Tissierellales	f__Peptoniphilaceae	g__Anaerococcus	s__Anaerococcus_octavius
sk__Bacteria	k__Bacteria	p__Firmicutes	c__Tissierellia	o__Tissierellales	f__Peptoniphilaceae	g__Helcococcus	s__Helcococcus_sueciensis
sk__Bacteria	k__Bacteria	p__Firmicutes	c__Tissierellia	o__Tissierellales	f__Tissierellaceae	Unclass_Tissierellaceae	Unclass_Tissierellaceae
sk__Bacteria	k__Bacteria	p__Fusobacteria	c__Fusobacteriia	Unclass_Fusobacteriia	Unclass_Fusobacteriia	Unclass_Fusobacteriia	Unclass_Fusobacteriia
sk__Bacteria	k__Bacteria	p__Gemmatimonadetes	c__Gemmatimonadetes	Unclass_Gemmatimonadetes	Unclass_Gemmatimonadetes	Unclass_Gemmatimonadetes	Unclass_Gemmatimonadetes
sk__Bacteria	k__Bacteria	p__Ignavibacteriae	c__Ignavibacteria	o__Ignavibacteriales	Unclass_Ignavibacteriales	Unclass_Ignavibacteriales	Unclass_Ignavibacteriales
sk__Bacteria	k__Bacteria	p__Proteobacteria	c__Alphaproteobacteria	o__Holosporales	Unclass_Holosporales	Unclass_Holosporales	Unclass_Holosporales
sk__Bacteria	k__Bacteria	p__Proteobacteria	c__Alphaproteobacteria	o__Rhizobiales	f__Aurantimonadaceae	Unclass_Aurantimonadaceae	Unclass_Aurantimonadaceae
sk__Bacteria	k__Bacteria	p__Proteobacteria	c__Alphaproteobacteria	o__Rhizobiales	f__Aurantimonadaceae	g__Aureimonas	Unclass_Aureimonas
sk__Bacteria	k__Bacteria	p__Proteobacteria	c__Alphaproteobacteria	o__Rhizobiales	f__Rhizobiaceae	Unclass_Rhizobiaceae	Unclass_Rhizobiaceae
sk__Bacteria	k__Bacteria	p__Proteobacteria	c__Betaproteobacteria	o__Burkholderiales	Unclass_Burkholderiales	g__Aquabacterium	Unclass_Aquabacterium
sk__Bacteria	k__Bacteria	p__Proteobacteria	c__Betaproteobacteria	o__Burkholderiales	f__Burkholderiaceae	g__Paraburkholderia	Unclass_Paraburkholderia
sk__Bacteria	k__Bacteria	p__Proteobacteria	c__Betaproteobacteria	o__Burkholderiales	f__Oxalobacteraceae	g__Massilia	Unclass_Massilia
sk__Bacteria	k__Bacteria	p__Proteobacteria	c__Betaproteobacteria	o__Burkholderiales	f__Sutterellaceae	g__Sutterella	s__Sutterella_sp._YIT_12072
sk__Bacteria	k__Bacteria	p__Proteobacteria	c__Deltaproteobacteria	Unclass_Deltaproteobacteria	Unclass_Deltaproteobacteria	g__Candidatus_Babela	s__Candidatus_Babela_massiliensis
sk__Bacteria	k__Bacteria	p__Proteobacteria	c__Epsilonproteobacteria	Unclass_Epsilonproteobacteria	Unclass_Epsilonproteobacteria	Unclass_Epsilonproteobacteria	Unclass_Epsilonproteobacteria
sk__Bacteria	k__Bacteria	p__Proteobacteria	c__Gammaproteobacteria	o__Cardiobacteriales	Unclass_Cardiobacteriales	Unclass_Cardiobacteriales	Unclass_Cardiobacteriales
sk__Bacteria	k__Bacteria	p__Proteobacteria	c__Gammaproteobacteria	o__Cardiobacteriales	f__Cardiobacteriaceae	g__Cardiobacterium	Unclass_Cardiobacterium
sk__Bacteria	k__Bacteria	p__Proteobacteria	c__Gammaproteobacteria	o__Chromatiales	f__Ectothiorhodospiraceae	Unclass_Ectothiorhodospiraceae	Unclass_Ectothiorhodospiraceae
sk__Bacteria	k__Bacteria	p__Proteobacteria	c__Gammaproteobacteria	o__Enterobacterales	f__Enterobacteriaceae	g__Klebsiella	s__Klebsiella_aerogenes
sk__Bacteria	k__Bacteria	p__Proteobacteria	c__Gammaproteobacteria	o__Legionellales	f__Legionellaceae	g__Legionella	Unclass_Legionella
sk__Bacteria	k__Bacteria	p__Proteobacteria	c__Oligoflexia	o__Bdellovibrionales	f__Bdellovibrionaceae	g__Bdellovibrio	Unclass_Bdellovibrio
sk__Bacteria	k__Bacteria	p__Tenericutes	c__Mollicutes	o__Anaeroplasmatales	Unclass_Anaeroplasmatales	Unclass_Anaeroplasmatales	Unclass_Anaeroplasmatales
sk__Bacteria	k__Bacteria	p__Verrucomicrobia	c__Spartobacteria	o__Chthoniobacterales	Unclass_Chthoniobacterales	Unclass_Chthoniobacterales	Unclass_Chthoniobacterales
sk__Bacteria	k__Bacteria	Unclass_Bacteria	Unclass_Bacteria	Unclass_Bacteria	Unclass_Bacteria	Unclass_Bacteria	s__Firmicutes_oral_clone_FM046
sk__Bacteria	k__Bacteria	p__Actinobacteria	c__Acidimicrobiia	o__Acidimicrobiales	f__Acidimicrobiaceae	g__Ilumatobacter	Unclass_Ilumatobacter
sk__Bacteria	k__Bacteria	p__Actinobacteria	c__Actinobacteria	o__Acidothermales	f__Acidothermaceae	g__Acidothermus	Unclass_Acidothermus
sk__Bacteria	k__Bacteria	p__Actinobacteria	c__Actinobacteria	o__Actinomycetales	f__Actinomycetaceae	g__Actinomyces	s__Actinomyces_oris
sk__Bacteria	k__Bacteria	p__Actinobacteria	c__Actinobacteria	o__Corynebacteriales	f__Corynebacteriaceae	g__Corynebacterium	s__Corynebacterium_accolens
sk__Bacteria	k__Bacteria	p__Actinobacteria	c__Actinobacteria	o__Jiangellales	f__Jiangellaceae	g__Haloactinopolyspora	Unclass_Haloactinopolyspora
sk__Bacteria	k__Bacteria	p__Actinobacteria	c__Actinobacteria	o__Kineosporiales	f__Kineosporiaceae	g__Quadrisphaera	Unclass_Quadrisphaera
sk__Bacteria	k__Bacteria	p__Actinobacteria	c__Actinobacteria	o__Micrococcales	f__Bogoriellaceae	g__Georgenia	Unclass_Georgenia
sk__Bacteria	k__Bacteria	p__Actinobacteria	c__Actinobacteria	o__Micrococcales	f__Brevibacteriaceae	Unclass_Brevibacteriaceae	Unclass_Brevibacteriaceae
sk__Bacteria	k__Bacteria	p__Actinobacteria	c__Actinobacteria	o__Micrococcales	f__Cellulomonadaceae	g__Cellulomonas	Unclass_Cellulomonas
sk__Bacteria	k__Bacteria	p__Actinobacteria	c__Actinobacteria	o__Micrococcales	f__Dermabacteraceae	g__Dermabacter	Unclass_Dermabacter
sk__Bacteria	k__Bacteria	p__Actinobacteria	c__Actinobacteria	o__Micrococcales	f__Microbacteriaceae	g__Pseudoclavibacter	Unclass_Pseudoclavibacter
sk__Bacteria	k__Bacteria	p__Actinobacteria	c__Actinobacteria	o__Propionibacteriales	f__Nocardioidaceae	g__Nocardioides	Unclass_Nocardioides
sk__Bacteria	k__Bacteria	p__Actinobacteria	c__Actinobacteria	o__Streptosporangiales	Unclass_Streptosporangiales	Unclass_Streptosporangiales	Unclass_Streptosporangiales
sk__Bacteria	k__Bacteria	p__Actinobacteria	c__Coriobacteriia	o__Eggerthellales	f__Eggerthellaceae	g__Eggerthella	Unclass_Eggerthella
sk__Bacteria	k__Bacteria	p__Actinobacteria	c__Coriobacteriia	o__Eggerthellales	f__Eggerthellaceae	g__Raoultibacter	Unclass_Raoultibacter
sk__Bacteria	k__Bacteria	p__Actinobacteria	c__Coriobacteriia	o__Eggerthellales	f__Eggerthellaceae	g__Raoultibacter	s__Raoultibacter_timonensis
sk__Bacteria	k__Bacteria	p__Actinobacteria	c__Rubrobacteria	o__Rubrobacterales	f__Rubrobacteraceae	g__Rubrobacter	Unclass_Rubrobacter
sk__Bacteria	k__Bacteria	p__Bacteroidetes	Unclass_Bacteroidetes	Unclass_Bacteroidetes	Unclass_Bacteroidetes	Unclass_Bacteroidetes	s__Bacteroidetes_oral_taxon_274
sk__Bacteria	k__Bacteria	p__Bacteroidetes	c__Bacteroidia	o__Bacteroidales	f__Dysgonamonadaceae	g__Dysgonomonas	Unclass_Dysgonomonas
sk__Bacteria	k__Bacteria	p__Bacteroidetes	c__Bacteroidia	o__Bacteroidales	f__Prevotellaceae	g__Prevotella	s__Prevotella_micans
sk__Bacteria	k__Bacteria	p__Bacteroidetes	c__Bacteroidia	o__Bacteroidales	f__Prevotellaceae	g__Prevotella	s__Prevotella_nigrescens
sk__Bacteria	k__Bacteria	p__Bacteroidetes	c__Bacteroidia	o__Bacteroidales	f__Tannerellaceae	g__Tannerella	Unclass_Tannerella
sk__Bacteria	k__Bacteria	p__Bacteroidetes	c__Bacteroidia	o__Bacteroidales	f__Tannerellaceae	g__Tannerella	s__Tannerella_forsythia
sk__Bacteria	k__Bacteria	p__Bacteroidetes	c__Chitinophagia	o__Chitinophagales	f__Chitinophagaceae	Unclass_Chitinophagaceae	Unclass_Chitinophagaceae
sk__Bacteria	k__Bacteria	p__Bacteroidetes	c__Chitinophagia	o__Chitinophagales	f__Chitinophagaceae	g__Asinibacterium	Unclass_Asinibacterium
sk__Bacteria	k__Bacteria	p__Bacteroidetes	c__Chitinophagia	o__Chitinophagales	f__Chitinophagaceae	g__Sediminibacterium	s__Sediminibacterium_sp._LT21-MRL
sk__Bacteria	k__Bacteria	p__Bacteroidetes	c__Cytophagia	o__Cytophagales	Unclass_Cytophagales	Unclass_Cytophagales	Unclass_Cytophagales
sk__Bacteria	k__Bacteria	p__Bacteroidetes	c__Cytophagia	o__Cytophagales	f__Cytophagaceae	g__Marinoscillum	Unclass_Marinoscillum
sk__Bacteria	k__Bacteria	p__Bacteroidetes	c__Flavobacteriia	o__Flavobacteriales	f__Flavobacteriaceae	g__Bergeyella	s__Bergeyella_sp._AF14
sk__Bacteria	k__Bacteria	p__Bacteroidetes	c__Flavobacteriia	o__Flavobacteriales	f__Flavobacteriaceae	g__Capnocytophaga	s__Capnocytophaga_sputigena
sk__Bacteria	k__Bacteria	p__Bacteroidetes	c__Sphingobacteriia	o__Sphingobacteriales	Unclass_Sphingobacteriales	Unclass_Sphingobacteriales	Unclass_Sphingobacteriales
sk__Bacteria	k__Bacteria	p__Candidatus_Saccharibacteria	Unclass_Candidatus_Saccharibacteria	Unclass_Candidatus_Saccharibacteria	Unclass_Candidatus_Saccharibacteria	Unclass_Candidatus_Saccharibacteria	s__TM7_phylum_sp._canine_oral_taxon_250
sk__Bacteria	k__Bacteria	p__Chlamydiae	c__Chlamydiia	o__Parachlamydiales	f__Parachlamydiaceae	g__Neochlamydia	Unclass_Neochlamydia
sk__Bacteria	k__Bacteria	p__Deferribacteres	c__Deferribacteres	Unclass_Deferribacteres	Unclass_Deferribacteres	Unclass_Deferribacteres	Unclass_Deferribacteres
sk__Bacteria	k__Bacteria	p__Firmicutes	c__Bacilli	o__Bacillales	Unclass_Bacillales	g__Gemella	s__Gemella_morbillorum
sk__Bacteria	k__Bacteria	p__Firmicutes	c__Bacilli	o__Bacillales	f__Paenibacillaceae	g__Paenibacillus	Unclass_Paenibacillus
sk__Bacteria	k__Bacteria	p__Firmicutes	c__Bacilli	o__Lactobacillales	f__Aerococcaceae	g__Eremococcus	Unclass_Eremococcus
sk__Bacteria	k__Bacteria	p__Firmicutes	c__Bacilli	o__Lactobacillales	f__Carnobacteriaceae	g__Granulicatella	s__Granulicatella_sp._BB-11
sk__Bacteria	k__Bacteria	p__Firmicutes	c__Bacilli	o__Lactobacillales	f__Carnobacteriaceae	g__Lacticigenium	s__Lacticigenium_naphtae
sk__Bacteria	k__Bacteria	p__Firmicutes	c__Bacilli	o__Lactobacillales	f__Enterococcaceae	g__Tetragenococcus	Unclass_Tetragenococcus
sk__Bacteria	k__Bacteria	p__Firmicutes	c__Bacilli	o__Lactobacillales	f__Enterococcaceae	g__Vagococcus	Unclass_Vagococcus
sk__Bacteria	k__Bacteria	p__Firmicutes	c__Bacilli	o__Lactobacillales	f__Streptococcaceae	g__Streptococcus	s__Streptococcus_cristatus
sk__Bacteria	k__Bacteria	p__Firmicutes	c__Bacilli	o__Lactobacillales	f__Streptococcaceae	g__Streptococcus	s__Streptococcus_pneumoniae
sk__Bacteria	k__Bacteria	p__Firmicutes	c__Clostridia	o__Clostridiales	Unclass_Clostridiales	Unclass_Clostridiales	s__Clostridiales_bacterium_canine_oral_taxon_259
sk__Bacteria	k__Bacteria	p__Firmicutes	c__Clostridia	o__Clostridiales	f__Clostridiales_Family_XIII._Incertae_Sedis	Unclass_Clostridiales_Family_XIII._Incertae_Sedis	s__[Eubacterium]_brachy
sk__Bacteria	k__Bacteria	p__Firmicutes	c__Clostridia	o__Clostridiales	f__Lachnospiraceae	g__Lachnoanaerobaculum	Unclass_Lachnoanaerobaculum
sk__Bacteria	k__Bacteria	p__Firmicutes	c__Clostridia	o__Clostridiales	f__Peptostreptococcaceae	g__Clostridioides	Unclass_Clostridioides
sk__Bacteria	k__Bacteria	p__Firmicutes	c__Clostridia	o__Clostridiales	f__Peptostreptococcaceae	g__Filifactor	Unclass_Filifactor
sk__Bacteria	k__Bacteria	p__Firmicutes	c__Clostridia	o__Thermoanaerobacterales	f__Thermoanaerobacteraceae	Unclass_Thermoanaerobacteraceae	Unclass_Thermoanaerobacteraceae
sk__Bacteria	k__Bacteria	p__Firmicutes	c__Erysipelotrichia	o__Erysipelotrichales	f__Erysipelotrichaceae	g__Bulleidia	s__Bulleidia_extructa
sk__Bacteria	k__Bacteria	p__Firmicutes	c__Erysipelotrichia	o__Erysipelotrichales	f__Erysipelotrichaceae	g__Eggerthia	Unclass_Eggerthia
sk__Bacteria	k__Bacteria	p__Firmicutes	c__Erysipelotrichia	o__Erysipelotrichales	f__Erysipelotrichaceae	g__Eggerthia	s__Eggerthia_catenaformis
sk__Bacteria	k__Bacteria	p__Firmicutes	c__Negativicutes	o__Veillonellales	f__Veillonellaceae	g__Veillonella	s__Veillonella_sp._oral_taxon_780
sk__Bacteria	k__Bacteria	p__Gemmatimonadetes	c__Gemmatimonadetes	o__Gemmatimonadales	Unclass_Gemmatimonadales	Unclass_Gemmatimonadales	Unclass_Gemmatimonadales
sk__Bacteria	k__Bacteria	p__Proteobacteria	c__Alphaproteobacteria	o__Kordiimonadales	Unclass_Kordiimonadales	Unclass_Kordiimonadales	Unclass_Kordiimonadales
sk__Bacteria	k__Bacteria	p__Proteobacteria	c__Alphaproteobacteria	o__Rhizobiales	f__Bradyrhizobiaceae	Unclass_Bradyrhizobiaceae	Unclass_Bradyrhizobiaceae
sk__Bacteria	k__Bacteria	p__Proteobacteria	c__Alphaproteobacteria	o__Rhizobiales	f__Brucellaceae	Unclass_Brucellaceae	Unclass_Brucellaceae
sk__Bacteria	k__Bacteria	p__Proteobacteria	c__Alphaproteobacteria	o__Rhizobiales	f__Hyphomicrobiaceae	g__Hyphomicrobium	Unclass_Hyphomicrobium
sk__Bacteria	k__Bacteria	p__Proteobacteria	c__Gammaproteobacteria	Unclass_Gammaproteobacteria	Unclass_Gammaproteobacteria	g__Candidatus_Ovatusbacter	Unclass_Candidatus_Ovatusbacter
sk__Bacteria	k__Bacteria	p__Proteobacteria	c__Gammaproteobacteria	o__Acidiferrobacterales	Unclass_Acidiferrobacterales	Unclass_Acidiferrobacterales	Unclass_Acidiferrobacterales
sk__Bacteria	k__Bacteria	p__Proteobacteria	c__Gammaproteobacteria	o__Cellvibrionales	f__Cellvibrionaceae	Unclass_Cellvibrionaceae	Unclass_Cellvibrionaceae
sk__Bacteria	k__Bacteria	p__Proteobacteria	c__Gammaproteobacteria	o__Cellvibrionales	f__Cellvibrionaceae	g__Cellvibrio	Unclass_Cellvibrio
sk__Bacteria	k__Bacteria	p__Proteobacteria	c__Gammaproteobacteria	o__Enterobacterales	f__Yersiniaceae	g__Yersinia	Unclass_Yersinia
sk__Bacteria	k__Bacteria	p__Proteobacteria	c__Gammaproteobacteria	o__Pasteurellales	f__Pasteurellaceae	g__Haemophilus	s__Haemophilus_pittmaniae
sk__Bacteria	k__Bacteria	p__Proteobacteria	c__Gammaproteobacteria	o__Pseudomonadales	f__Moraxellaceae	g__Psychrobacter	Unclass_Psychrobacter
sk__Bacteria	k__Bacteria	p__Proteobacteria	c__Gammaproteobacteria	o__Xanthomonadales	f__Xanthomonadaceae	g__Pseudoxanthomonas	Unclass_Pseudoxanthomonas
sk__Bacteria	k__Bacteria	p__Proteobacteria	c__Gammaproteobacteria	o__Xanthomonadales	f__Xanthomonadaceae	g__Thermomonas	Unclass_Thermomonas
sk__Bacteria	k__Bacteria	p__Synergistetes	c__Synergistia	o__Synergistales	f__Synergistaceae	Unclass_Synergistaceae	Unclass_Synergistaceae
sk__Bacteria	k__Bacteria	p__Tenericutes	c__Mollicutes	o__Acholeplasmatales	Unclass_Acholeplasmatales	Unclass_Acholeplasmatales	Unclass_Acholeplasmatales
sk__Bacteria	k__Bacteria	p__Acidobacteria	c__Holophagae	Unclass_Holophagae	Unclass_Holophagae	Unclass_Holophagae	Unclass_Holophagae
sk__Bacteria	k__Bacteria	p__Actinobacteria	c__Actinobacteria	o__Bifidobacteriales	Unclass_Bifidobacteriales	g__Candidatus_Ancillula	Unclass_Candidatus_Ancillula
sk__Bacteria	k__Bacteria	p__Actinobacteria	c__Actinobacteria	o__Bifidobacteriales	f__Bifidobacteriaceae	g__Aeriscardovia	Unclass_Aeriscardovia
sk__Bacteria	k__Bacteria	p__Actinobacteria	c__Actinobacteria	o__Bifidobacteriales	f__Bifidobacteriaceae	g__Bifidobacterium	s__Bifidobacterium_aerophilum
sk__Bacteria	k__Bacteria	p__Actinobacteria	c__Actinobacteria	o__Bifidobacteriales	f__Bifidobacteriaceae	g__Bifidobacterium	s__Bifidobacterium_angulatum
sk__Bacteria	k__Bacteria	p__Actinobacteria	c__Actinobacteria	o__Bifidobacteriales	f__Bifidobacteriaceae	g__Bifidobacterium	s__Bifidobacterium_animalis
sk__Bacteria	k__Bacteria	p__Actinobacteria	c__Actinobacteria	o__Bifidobacteriales	f__Bifidobacteriaceae	g__Bifidobacterium	s__Bifidobacterium_avesanii
sk__Bacteria	k__Bacteria	p__Actinobacteria	c__Actinobacteria	o__Bifidobacteriales	f__Bifidobacteriaceae	g__Bifidobacterium	s__Bifidobacterium_biavatii
sk__Bacteria	k__Bacteria	p__Actinobacteria	c__Actinobacteria	o__Bifidobacteriales	f__Bifidobacteriaceae	g__Bifidobacterium	s__Bifidobacterium_sp._MC_10
sk__Bacteria	k__Bacteria	p__Actinobacteria	c__Actinobacteria	o__Bifidobacteriales	f__Bifidobacteriaceae	g__Pseudoscardovia	Unclass_Pseudoscardovia
sk__Bacteria	k__Bacteria	p__Actinobacteria	c__Actinobacteria	o__Corynebacteriales	f__Segniliparaceae	Unclass_Segniliparaceae	Unclass_Segniliparaceae
sk__Bacteria	k__Bacteria	p__Actinobacteria	c__Actinobacteria	o__Micrococcales	f__Cellulomonadaceae	Unclass_Cellulomonadaceae	Unclass_Cellulomonadaceae
sk__Bacteria	k__Bacteria	p__Actinobacteria	c__Actinobacteria	o__Micrococcales	f__Microbacteriaceae	g__Candidatus_Aquiluna	Unclass_Candidatus_Aquiluna
sk__Bacteria	k__Bacteria	p__Actinobacteria	c__Actinobacteria	o__Micrococcales	f__Microbacteriaceae	g__Candidatus_Limnoluna	Unclass_Candidatus_Limnoluna
sk__Bacteria	k__Bacteria	p__Actinobacteria	c__Actinobacteria	o__Micrococcales	f__Micrococcaceae	g__Haematomicrobium	Unclass_Haematomicrobium
sk__Bacteria	k__Bacteria	p__Actinobacteria	c__Actinobacteria	o__Micromonosporales	Unclass_Micromonosporales	Unclass_Micromonosporales	Unclass_Micromonosporales
sk__Bacteria	k__Bacteria	p__Actinobacteria	c__Actinobacteria	o__Nakamurellales	f__Nakamurellaceae	g__Nakamurella	Unclass_Nakamurella
sk__Bacteria	k__Bacteria	p__Actinobacteria	c__Actinobacteria	o__Propionibacteriales	f__Nocardioidaceae	g__Nocardioides	s__Nocardioides_sp._N37(2010)
sk__Bacteria	k__Bacteria	p__Actinobacteria	c__Coriobacteriia	o__Coriobacteriales	f__Coriobacteriaceae	g__Collinsella	s__Collinsella_sp._Marseille-P3740
sk__Bacteria	k__Bacteria	p__Actinobacteria	c__Coriobacteriia	o__Eggerthellales	f__Eggerthellaceae	g__Slackia	s__Slackia_heliotrinireducens
sk__Bacteria	k__Bacteria	p__Actinobacteria	c__Nitriliruptoria	Unclass_Nitriliruptoria	Unclass_Nitriliruptoria	Unclass_Nitriliruptoria	Unclass_Nitriliruptoria
sk__Bacteria	k__Bacteria	p__Actinobacteria	c__Rubrobacteria	Unclass_Rubrobacteria	Unclass_Rubrobacteria	Unclass_Rubrobacteria	Unclass_Rubrobacteria
sk__Bacteria	k__Bacteria	p__Actinobacteria	c__Thermoleophilia	o__Solirubrobacterales	Unclass_Solirubrobacterales	Unclass_Solirubrobacterales	Unclass_Solirubrobacterales
sk__Bacteria	k__Bacteria	p__Armatimonadetes	c__Armatimonadia	Unclass_Armatimonadia	Unclass_Armatimonadia	Unclass_Armatimonadia	Unclass_Armatimonadia
sk__Bacteria	k__Bacteria	p__Bacteroidetes	c__Bacteroidia	o__Bacteroidales	f__Bacteroidaceae	g__Bacteroides	s__Bacteroides_fragilis
sk__Bacteria	k__Bacteria	p__Bacteroidetes	c__Bacteroidia	o__Bacteroidales	f__Bacteroidaceae	g__Bacteroides	s__Bacteroides_propionicifaciens
sk__Bacteria	k__Bacteria	p__Bacteroidetes	c__Bacteroidia	o__Bacteroidales	f__Barnesiellaceae	Unclass_Barnesiellaceae	Unclass_Barnesiellaceae
sk__Bacteria	k__Bacteria	p__Bacteroidetes	c__Bacteroidia	o__Bacteroidales	f__Odoribacteraceae	Unclass_Odoribacteraceae	Unclass_Odoribacteraceae
sk__Bacteria	k__Bacteria	p__Bacteroidetes	c__Bacteroidia	o__Bacteroidales	f__Prevotellaceae	g__Alloprevotella	s__Alloprevotella_tannerae
sk__Bacteria	k__Bacteria	p__Bacteroidetes	c__Bacteroidia	o__Bacteroidales	f__Prevotellaceae	g__Prevotella	s__Prevotella_sp._AN_5135
sk__Bacteria	k__Bacteria	p__Bacteroidetes	c__Bacteroidia	o__Bacteroidales	f__Prevotellaceae	g__Prevotella	s__Prevotella_stercorea
sk__Bacteria	k__Bacteria	p__Bacteroidetes	c__Bacteroidia	o__Bacteroidales	f__Rikenellaceae	g__Alistipes	s__Alistipes_finegoldii
sk__Bacteria	k__Bacteria	p__Bacteroidetes	c__Bacteroidia	o__Marinilabiliales	f__Marinifilaceae	Unclass_Marinifilaceae	Unclass_Marinifilaceae
sk__Bacteria	k__Bacteria	p__Bacteroidetes	c__Chitinophagia	o__Chitinophagales	f__Chitinophagaceae	g__Dinghuibacter	Unclass_Dinghuibacter
sk__Bacteria	k__Bacteria	p__Bacteroidetes	c__Cytophagia	Unclass_Cytophagia	Unclass_Cytophagia	Unclass_Cytophagia	Unclass_Cytophagia
sk__Bacteria	k__Bacteria	p__Bacteroidetes	c__Cytophagia	o__Cytophagales	f__Amoebophilaceae	Unclass_Amoebophilaceae	Unclass_Amoebophilaceae
sk__Bacteria	k__Bacteria	p__Bacteroidetes	c__Flavobacteriia	o__Flavobacteriales	f__Cryomorphaceae	Unclass_Cryomorphaceae	Unclass_Cryomorphaceae
sk__Bacteria	k__Bacteria	p__Bacteroidetes	c__Sphingobacteriia	Unclass_Sphingobacteriia	Unclass_Sphingobacteriia	Unclass_Sphingobacteriia	Unclass_Sphingobacteriia
sk__Bacteria	k__Bacteria	p__Chlamydiae	Unclass_Chlamydiae	Unclass_Chlamydiae	Unclass_Chlamydiae	Unclass_Chlamydiae	Unclass_Chlamydiae
sk__Bacteria	k__Bacteria	p__Chlamydiae	c__Chlamydiia	Unclass_Chlamydiia	Unclass_Chlamydiia	Unclass_Chlamydiia	Unclass_Chlamydiia
sk__Bacteria	k__Bacteria	p__Chlamydiae	c__Chlamydiia	o__Parachlamydiales	Unclass_Parachlamydiales	Unclass_Parachlamydiales	Unclass_Parachlamydiales
sk__Bacteria	k__Bacteria	p__Chloroflexi	c__Anaerolineae	Unclass_Anaerolineae	Unclass_Anaerolineae	Unclass_Anaerolineae	Unclass_Anaerolineae
sk__Bacteria	k__Bacteria	p__Chloroflexi	c__Anaerolineae	o__Anaerolineales	Unclass_Anaerolineales	Unclass_Anaerolineales	Unclass_Anaerolineales
sk__Bacteria	k__Bacteria	p__Chloroflexi	c__Dehalococcoidia	o__Dehalococcoidales	Unclass_Dehalococcoidales	Unclass_Dehalococcoidales	Unclass_Dehalococcoidales
sk__Bacteria	k__Bacteria	p__Elusimicrobia	c__Endomicrobia	o__Endomicrobiales	f__Endomicrobiaceae	Unclass_Endomicrobiaceae	Unclass_Endomicrobiaceae
sk__Bacteria	k__Bacteria	p__Fibrobacteres	c__Fibrobacteria	o__Fibrobacterales	Unclass_Fibrobacterales	Unclass_Fibrobacterales	Unclass_Fibrobacterales
sk__Bacteria	k__Bacteria	p__Firmicutes	c__Bacilli	o__Bacillales	f__Pasteuriaceae	g__Pasteuria	Unclass_Pasteuria
sk__Bacteria	k__Bacteria	p__Firmicutes	c__Bacilli	o__Lactobacillales	f__Carnobacteriaceae	g__Alloiococcus	Unclass_Alloiococcus
sk__Bacteria	k__Bacteria	p__Firmicutes	c__Clostridia	o__Clostridiales	Unclass_Clostridiales	g__Flavonifractor	Unclass_Flavonifractor
sk__Bacteria	k__Bacteria	p__Firmicutes	c__Clostridia	o__Clostridiales	Unclass_Clostridiales	g__Flavonifractor	s__Flavonifractor_plautii
sk__Bacteria	k__Bacteria	p__Firmicutes	c__Clostridia	o__Clostridiales	f__Clostridiaceae	g__Caloranaerobacter	Unclass_Caloranaerobacter
sk__Bacteria	k__Bacteria	p__Firmicutes	c__Clostridia	o__Clostridiales	f__Clostridiaceae	g__Caminicella	Unclass_Caminicella
sk__Bacteria	k__Bacteria	p__Firmicutes	c__Clostridia	o__Clostridiales	f__Clostridiaceae	g__Clostridium	s__Clostridium_sp._Marseille-P2415
sk__Bacteria	k__Bacteria	p__Firmicutes	c__Clostridia	o__Clostridiales	f__Clostridiales_Family_XVII._Incertae_Sedis	Unclass_Clostridiales_Family_XVII._Incertae_Sedis	Unclass_Clostridiales_Family_XVII._Incertae_Sedis
sk__Bacteria	k__Bacteria	p__Firmicutes	c__Clostridia	o__Clostridiales	f__Gracilibacteraceae	Unclass_Gracilibacteraceae	Unclass_Gracilibacteraceae
sk__Bacteria	k__Bacteria	p__Firmicutes	c__Clostridia	o__Clostridiales	f__Lachnospiraceae	g__Lachnoclostridium	s__[Clostridium]_polysaccharolyticum
sk__Bacteria	k__Bacteria	p__Firmicutes	c__Clostridia	o__Clostridiales	f__Lachnospiraceae	g__Syntrophococcus	Unclass_Syntrophococcus
sk__Bacteria	k__Bacteria	p__Firmicutes	c__Clostridia	o__Clostridiales	f__Ruminococcaceae	g__Ruminococcus	s__Ruminococcus_sp._YE58
sk__Bacteria	k__Bacteria	p__Firmicutes	c__Clostridia	o__Thermoanaerobacterales	Unclass_Thermoanaerobacterales	Unclass_Thermoanaerobacterales	Unclass_Thermoanaerobacterales
sk__Bacteria	k__Bacteria	p__Firmicutes	c__Clostridia	o__Thermoanaerobacterales	f__Thermodesulfobiaceae	g__Coprothermobacter	Unclass_Coprothermobacter
sk__Bacteria	k__Bacteria	p__Planctomycetes	c__Planctomycetia	Unclass_Planctomycetia	Unclass_Planctomycetia	Unclass_Planctomycetia	Unclass_Planctomycetia
sk__Bacteria	k__Bacteria	p__Planctomycetes	c__Planctomycetia	o__Planctomycetales	f__Isosphaeraceae	g__Singulisphaera	Unclass_Singulisphaera
sk__Bacteria	k__Bacteria	p__Planctomycetes	c__Planctomycetia	o__Planctomycetales	f__Planctomycetaceae	Unclass_Planctomycetaceae	Unclass_Planctomycetaceae
sk__Bacteria	k__Bacteria	p__Planctomycetes	c__Planctomycetia	o__Planctomycetales	f__Planctomycetaceae	g__Pirellula	Unclass_Pirellula
sk__Bacteria	k__Bacteria	p__Planctomycetes	c__Planctomycetia	o__Planctomycetales	f__Planctomycetaceae	g__Planctopirus	Unclass_Planctopirus
sk__Bacteria	k__Bacteria	p__Proteobacteria	c__Alphaproteobacteria	o__Magnetococcales	f__Magnetococcaceae	Unclass_Magnetococcaceae	Unclass_Magnetococcaceae
sk__Bacteria	k__Bacteria	p__Proteobacteria	c__Alphaproteobacteria	o__Rhizobiales	f__Hyphomicrobiaceae	g__Devosia	Unclass_Devosia
sk__Bacteria	k__Bacteria	p__Proteobacteria	c__Alphaproteobacteria	o__Rhodobacterales	f__Rhodobacteraceae	g__Amaricoccus	Unclass_Amaricoccus
sk__Bacteria	k__Bacteria	p__Proteobacteria	c__Alphaproteobacteria	o__Rhodospirillales	Unclass_Rhodospirillales	g__Reyranella	Unclass_Reyranella
sk__Bacteria	k__Bacteria	p__Proteobacteria	c__Alphaproteobacteria	o__Rickettsiales	f__Anaplasmataceae	Unclass_Anaplasmataceae	Unclass_Anaplasmataceae
sk__Bacteria	k__Bacteria	p__Proteobacteria	c__Alphaproteobacteria	o__Rickettsiales	f__Candidatus_Midichloriaceae	Unclass_Candidatus_Midichloriaceae	Unclass_Candidatus_Midichloriaceae
sk__Bacteria	k__Bacteria	p__Proteobacteria	c__Alphaproteobacteria	o__Rickettsiales	f__Candidatus_Midichloriaceae	g__Candidatus_Jidaibacter	Unclass_Candidatus_Jidaibacter
sk__Bacteria	k__Bacteria	p__Proteobacteria	c__Betaproteobacteria	o__Burkholderiales	Unclass_Burkholderiales	g__Thiomonas	Unclass_Thiomonas
sk__Bacteria	k__Bacteria	p__Proteobacteria	c__Betaproteobacteria	o__Burkholderiales	f__Oxalobacteraceae	g__Undibacterium	Unclass_Undibacterium
sk__Bacteria	k__Bacteria	p__Proteobacteria	c__Betaproteobacteria	o__Burkholderiales	f__Sutterellaceae	g__Duodenibacillus	Unclass_Duodenibacillus
sk__Bacteria	k__Bacteria	p__Proteobacteria	c__Betaproteobacteria	o__Neisseriales	f__Chromobacteriaceae	Unclass_Chromobacteriaceae	Unclass_Chromobacteriaceae
sk__Bacteria	k__Bacteria	p__Proteobacteria	c__Betaproteobacteria	o__Nitrosomonadales	f__Methylophilaceae	Unclass_Methylophilaceae	Unclass_Methylophilaceae
sk__Bacteria	k__Bacteria	p__Proteobacteria	c__Deltaproteobacteria	o__Desulfobacterales	f__Desulfobulbaceae	g__Desulfobulbus	Unclass_Desulfobulbus
sk__Bacteria	k__Bacteria	p__Proteobacteria	c__Deltaproteobacteria	o__Desulfovibrionales	f__Desulfohalobiaceae	Unclass_Desulfohalobiaceae	Unclass_Desulfohalobiaceae
sk__Bacteria	k__Bacteria	p__Proteobacteria	c__Deltaproteobacteria	o__Myxococcales	f__Polyangiaceae	g__Pajaroellobacter	Unclass_Pajaroellobacter
sk__Bacteria	k__Bacteria	p__Proteobacteria	c__Gammaproteobacteria	o__Oceanospirillales	f__Oleiphilaceae	Unclass_Oleiphilaceae	Unclass_Oleiphilaceae
sk__Bacteria	k__Bacteria	p__Proteobacteria	c__Oligoflexia	o__Bdellovibrionales	Unclass_Bdellovibrionales	Unclass_Bdellovibrionales	Unclass_Bdellovibrionales
sk__Bacteria	k__Bacteria	p__Proteobacteria	c__Zetaproteobacteria	o__Mariprofundales	f__Mariprofundaceae	g__Mariprofundus	Unclass_Mariprofundus
sk__Bacteria	k__Bacteria	p__Spirochaetes	Unclass_Spirochaetes	Unclass_Spirochaetes	Unclass_Spirochaetes	Unclass_Spirochaetes	Unclass_Spirochaetes
sk__Bacteria	k__Bacteria	p__Spirochaetes	c__Spirochaetia	Unclass_Spirochaetia	f__Leptospiraceae	Unclass_Leptospiraceae	Unclass_Leptospiraceae
sk__Bacteria	k__Bacteria	p__Verrucomicrobia	c__Opitutae	o__Opitutales	Unclass_Opitutales	Unclass_Opitutales	Unclass_Opitutales
sk__Bacteria	k__Bacteria	p__Verrucomicrobia	c__Verrucomicrobiae	o__Verrucomicrobiales	f__Verrucomicrobiaceae	Unclass_Verrucomicrobiaceae	Unclass_Verrucomicrobiaceae
sk__Bacteria	k__Bacteria	p__Verrucomicrobia	c__Verrucomicrobiae	o__Verrucomicrobiales	f__Verrucomicrobiaceae	g__Luteolibacter	Unclass_Luteolibacter
sk__Bacteria	k__Bacteria	p__Verrucomicrobia	c__Verrucomicrobiae	o__Verrucomicrobiales	f__Verrucomicrobiaceae	g__Verrucomicrobium	Unclass_Verrucomicrobium
sk__Eukaryota	k__Eukaryota	Unclass_Eukaryota	Unclass_Eukaryota	o__Bicosoecida	Unclass_Bicosoecida	g__Adriamonas	s__Adriamonas_peritocrescens
sk__Eukaryota	k__Eukaryota	Unclass_Eukaryota	Unclass_Eukaryota	o__Cercomonadida	f__Cercomonadidae	g__Paracercomonas	s__Paracercomonas_saepenatans
sk__Eukaryota	k__Eukaryota	Unclass_Eukaryota	c__Oligohymenophorea	o__Sessilida	f__Vorticellidae	Unclass_Vorticellidae	Unclass_Vorticellidae
sk__Archaea	k__Archaea	p__Euryarchaeota	c__Methanobacteria	o__Methanobacteriales	f__Methanobacteriaceae	g__Methanosphaera	s__Methanosphaera_stadtmanae
sk__Archaea	k__Archaea	p__Euryarchaeota	c__Methanomicrobia	o__Methanomicrobiales	f__Methanomicrobiaceae	Unclass_Methanomicrobiaceae	Unclass_Methanomicrobiaceae
sk__Bacteria	k__Bacteria	Unclass_Bacteria	Unclass_Bacteria	Unclass_Bacteria	Unclass_Bacteria	Unclass_Bacteria	s__bacterium_'New_Zealand_D'
sk__Bacteria	k__Bacteria	Unclass_Bacteria	Unclass_Bacteria	Unclass_Bacteria	Unclass_Bacteria	Unclass_Bacteria	s__bacterium_NLAE-zl-C145
sk__Bacteria	k__Bacteria	Unclass_Bacteria	Unclass_Bacteria	Unclass_Bacteria	Unclass_Bacteria	Unclass_Bacteria	s__bacterium_endosymbiont_of_Onthophagus_Taurus
sk__Bacteria	k__Bacteria	Unclass_Bacteria	Unclass_Bacteria	Unclass_Bacteria	Unclass_Bacteria	Unclass_Bacteria	s__rumen_bacterium_NK4A214
sk__Bacteria	k__Bacteria	p__Acidobacteria	c__Holophagae	o__Holophagales	Unclass_Holophagales	Unclass_Holophagales	Unclass_Holophagales
sk__Bacteria	k__Bacteria	p__Acidobacteria	c__Holophagae	o__Holophagales	f__Holophagaceae	Unclass_Holophagaceae	Unclass_Holophagaceae
sk__Bacteria	k__Bacteria	p__Acidobacteria	c__Holophagae	o__Holophagales	f__Holophagaceae	g__Holophaga	s__Holophaga_foetida
sk__Bacteria	k__Bacteria	p__Actinobacteria	c__Acidimicrobiia	o__Acidimicrobiales	Unclass_Acidimicrobiales	Unclass_Acidimicrobiales	Unclass_Acidimicrobiales
sk__Bacteria	k__Bacteria	p__Actinobacteria	c__Acidimicrobiia	o__Acidimicrobiales	f__Acidimicrobiaceae	g__Acidimicrobium	Unclass_Acidimicrobium
sk__Bacteria	k__Bacteria	p__Actinobacteria	c__Actinobacteria	o__Kineosporiales	Unclass_Kineosporiales	Unclass_Kineosporiales	Unclass_Kineosporiales
sk__Bacteria	k__Bacteria	p__Actinobacteria	c__Actinobacteria	o__Micrococcales	f__Promicromonosporaceae	g__Cellulosimicrobium	Unclass_Cellulosimicrobium
sk__Bacteria	k__Bacteria	p__Bacteroidetes	c__Bacteroidia	o__Bacteroidales	f__Prevotellaceae	g__Alloprevotella	s__Alloprevotella_rava
sk__Bacteria	k__Bacteria	p__Bacteroidetes	c__Bacteroidia	o__Bacteroidales	f__Prevotellaceae	g__Massiliprevotella	Unclass_Massiliprevotella
sk__Bacteria	k__Bacteria	p__Bacteroidetes	c__Bacteroidia	o__Bacteroidales	f__Prevotellaceae	g__Prevotella	s__Prevotella_copri
sk__Bacteria	k__Bacteria	p__Bacteroidetes	c__Bacteroidia	o__Bacteroidales	f__Prevotellaceae	g__Prevotella	s__Prevotella_sp._152R-1a
sk__Bacteria	k__Bacteria	p__Bacteroidetes	c__Bacteroidia	o__Bacteroidales	f__Prevotellaceae	g__Prevotella	s__Prevotella_sp._oral_clone_ASCG10
sk__Bacteria	k__Bacteria	p__Bacteroidetes	c__Bacteroidia	o__Bacteroidales	f__Prevotellaceae	g__Prevotellamassilia	Unclass_Prevotellamassilia
sk__Bacteria	k__Bacteria	p__Bacteroidetes	c__Bacteroidia	o__Bacteroidales	f__Rikenellaceae	g__Rikenella	Unclass_Rikenella
sk__Bacteria	k__Bacteria	p__Bacteroidetes	c__Bacteroidia	o__Marinilabiliales	f__Marinifilaceae	g__Marinifilum	Unclass_Marinifilum
sk__Bacteria	k__Bacteria	p__Bacteroidetes	c__Chitinophagia	Unclass_Chitinophagia	Unclass_Chitinophagia	Unclass_Chitinophagia	Unclass_Chitinophagia
sk__Bacteria	k__Bacteria	p__Bacteroidetes	c__Flavobacteriia	o__Flavobacteriales	f__Crocinitomicaceae	Unclass_Crocinitomicaceae	Unclass_Crocinitomicaceae
sk__Bacteria	k__Bacteria	p__Bacteroidetes	c__Sphingobacteriia	o__Sphingobacteriales	f__Sphingobacteriaceae	Unclass_Sphingobacteriaceae	Unclass_Sphingobacteriaceae
sk__Bacteria	k__Bacteria	p__Bacteroidetes	c__Sphingobacteriia	o__Sphingobacteriales	f__Sphingobacteriaceae	g__Sphingobacterium	s__Sphingobacterium_sp._JAS3
sk__Bacteria	k__Bacteria	p__Calditrichaeota	c__Calditrichae	o__Calditrichales	Unclass_Calditrichales	Unclass_Calditrichales	Unclass_Calditrichales
sk__Bacteria	k__Bacteria	p__Candidatus_Latescibacteria	Unclass_Candidatus_Latescibacteria	Unclass_Candidatus_Latescibacteria	Unclass_Candidatus_Latescibacteria	g__Candidatus_Latescibacter	Unclass_Candidatus_Latescibacter
sk__Bacteria	k__Bacteria	p__Candidatus_Melainabacteria	Unclass_Candidatus_Melainabacteria	Unclass_Candidatus_Melainabacteria	Unclass_Candidatus_Melainabacteria	Unclass_Candidatus_Melainabacteria	Unclass_Candidatus_Melainabacteria
sk__Bacteria	k__Bacteria	p__Chloroflexi	c__Ardenticatenia	o__Ardenticatenales	Unclass_Ardenticatenales	Unclass_Ardenticatenales	Unclass_Ardenticatenales
sk__Bacteria	k__Bacteria	p__Cyanobacteria	Unclass_Cyanobacteria	o__Nostocales	Unclass_Nostocales	Unclass_Nostocales	Unclass_Nostocales
sk__Bacteria	k__Bacteria	p__Cyanobacteria	c__Gloeobacteria	o__Gloeobacterales	Unclass_Gloeobacterales	Unclass_Gloeobacterales	Unclass_Gloeobacterales
sk__Bacteria	k__Bacteria	p__Firmicutes	Unclass_Firmicutes	Unclass_Firmicutes	Unclass_Firmicutes	Unclass_Firmicutes	s__Firmicutes_bacterium_CAG:345
sk__Bacteria	k__Bacteria	p__Firmicutes	c__Bacilli	o__Lactobacillales	f__Carnobacteriaceae	g__Trichococcus	Unclass_Trichococcus
sk__Bacteria	k__Bacteria	p__Firmicutes	c__Clostridia	o__Clostridiales	Unclass_Clostridiales	Unclass_Clostridiales	s__Clostridiales_bacterium_oral_taxon_F32
sk__Bacteria	k__Bacteria	p__Firmicutes	c__Clostridia	o__Clostridiales	Unclass_Clostridiales	g__Colidextribacter	s__Colidextribacter_massiliensis
sk__Bacteria	k__Bacteria	p__Firmicutes	c__Clostridia	o__Clostridiales	Unclass_Clostridiales	g__Proteiniborus	Unclass_Proteiniborus
sk__Bacteria	k__Bacteria	p__Firmicutes	c__Clostridia	o__Clostridiales	f__Christensenellaceae	g__Christensenella	s__Christensenella_massiliensis
sk__Bacteria	k__Bacteria	p__Firmicutes	c__Clostridia	o__Clostridiales	f__Clostridiaceae	g__Caloramator	Unclass_Caloramator
sk__Bacteria	k__Bacteria	p__Firmicutes	c__Clostridia	o__Clostridiales	f__Clostridiaceae	g__Clostridium	s__Clostridium_sp._CE6
sk__Bacteria	k__Bacteria	p__Firmicutes	c__Clostridia	o__Clostridiales	f__Clostridiaceae	g__Hungatella	Unclass_Hungatella
sk__Bacteria	k__Bacteria	p__Firmicutes	c__Clostridia	o__Clostridiales	f__Lachnospiraceae	g__Acetitomaculum	Unclass_Acetitomaculum
sk__Bacteria	k__Bacteria	p__Firmicutes	c__Clostridia	o__Clostridiales	f__Lachnospiraceae	g__Cellulosilyticum	Unclass_Cellulosilyticum
sk__Bacteria	k__Bacteria	p__Firmicutes	c__Clostridia	o__Clostridiales	f__Lachnospiraceae	g__Dorea	s__Dorea_longicatena
sk__Bacteria	k__Bacteria	p__Firmicutes	c__Clostridia	o__Clostridiales	f__Lachnospiraceae	g__Herbinix	Unclass_Herbinix
sk__Bacteria	k__Bacteria	p__Firmicutes	c__Clostridia	o__Clostridiales	f__Lachnospiraceae	g__Robinsoniella	Unclass_Robinsoniella
sk__Bacteria	k__Bacteria	p__Firmicutes	c__Clostridia	o__Clostridiales	f__Lachnospiraceae	g__Sellimonas	Unclass_Sellimonas
sk__Bacteria	k__Bacteria	p__Firmicutes	c__Clostridia	o__Clostridiales	f__Oscillospiraceae	Unclass_Oscillospiraceae	Unclass_Oscillospiraceae
sk__Bacteria	k__Bacteria	p__Firmicutes	c__Clostridia	o__Clostridiales	f__Peptostreptococcaceae	g__Peptoclostridium	Unclass_Peptoclostridium
sk__Bacteria	k__Bacteria	p__Firmicutes	c__Clostridia	o__Clostridiales	f__Ruminococcaceae	g__Acetivibrio	Unclass_Acetivibrio
sk__Bacteria	k__Bacteria	p__Firmicutes	c__Clostridia	o__Clostridiales	f__Ruminococcaceae	g__Anaerofilum	Unclass_Anaerofilum
sk__Bacteria	k__Bacteria	p__Firmicutes	c__Clostridia	o__Clostridiales	f__Ruminococcaceae	g__Hydrogenoanaerobacterium	Unclass_Hydrogenoanaerobacterium
sk__Bacteria	k__Bacteria	p__Firmicutes	c__Clostridia	o__Clostridiales	f__Ruminococcaceae	g__Oscillospira	Unclass_Oscillospira
sk__Bacteria	k__Bacteria	p__Firmicutes	c__Clostridia	o__Clostridiales	f__Ruminococcaceae	g__Ruminiclostridium	s__[Clostridium]_leptum
sk__Bacteria	k__Bacteria	p__Firmicutes	c__Clostridia	o__Thermoanaerobacterales	f__Thermodesulfobiaceae	Unclass_Thermodesulfobiaceae	Unclass_Thermodesulfobiaceae
sk__Bacteria	k__Bacteria	p__Firmicutes	c__Erysipelotrichia	o__Erysipelotrichales	f__Erysipelotrichaceae	g__Catenisphaera	Unclass_Catenisphaera
sk__Bacteria	k__Bacteria	p__Firmicutes	c__Erysipelotrichia	o__Erysipelotrichales	f__Erysipelotrichaceae	g__Dubosiella	s__Dubosiella_newyorkensis
sk__Bacteria	k__Bacteria	p__Firmicutes	c__Negativicutes	o__Selenomonadales	f__Selenomonadaceae	g__Schwartzia	Unclass_Schwartzia
sk__Bacteria	k__Bacteria	p__Firmicutes	c__Negativicutes	o__Veillonellales	f__Veillonellaceae	g__Allisonella	s__Allisonella_histaminiformans
sk__Bacteria	k__Bacteria	p__Firmicutes	c__Tissierellia	o__Tissierellales	f__Gottschalkiaceae	g__Gottschalkia	Unclass_Gottschalkia
sk__Bacteria	k__Bacteria	p__Lentisphaerae	c__Lentisphaeria	o__Victivallales	f__Victivallaceae	g__Victivallis	Unclass_Victivallis
sk__Bacteria	k__Bacteria	p__Proteobacteria	c__Acidithiobacillia	o__Acidithiobacillales	Unclass_Acidithiobacillales	Unclass_Acidithiobacillales	Unclass_Acidithiobacillales
sk__Bacteria	k__Bacteria	p__Proteobacteria	c__Alphaproteobacteria	o__Holosporales	f__Candidatus_Paracaedibacteraceae	g__Candidatus_Paracaedibacter	Unclass_Candidatus_Paracaedibacter
sk__Bacteria	k__Bacteria	p__Proteobacteria	c__Alphaproteobacteria	o__Magnetococcales	Unclass_Magnetococcales	Unclass_Magnetococcales	Unclass_Magnetococcales
sk__Bacteria	k__Bacteria	p__Proteobacteria	c__Alphaproteobacteria	o__Parvularculales	f__Parvularculaceae	Unclass_Parvularculaceae	Unclass_Parvularculaceae
sk__Bacteria	k__Bacteria	p__Proteobacteria	c__Alphaproteobacteria	o__Pelagibacterales	Unclass_Pelagibacterales	Unclass_Pelagibacterales	Unclass_Pelagibacterales
sk__Bacteria	k__Bacteria	p__Proteobacteria	c__Alphaproteobacteria	o__Rhodospirillales	Unclass_Rhodospirillales	g__Enhydrobacter	Unclass_Enhydrobacter
sk__Bacteria	k__Bacteria	p__Proteobacteria	c__Alphaproteobacteria	o__Rhodospirillales	f__Acetobacteraceae	g__Komagataeibacter	Unclass_Komagataeibacter
sk__Bacteria	k__Bacteria	p__Proteobacteria	c__Betaproteobacteria	o__Burkholderiales	Unclass_Burkholderiales	g__Ideonella	Unclass_Ideonella
sk__Bacteria	k__Bacteria	p__Proteobacteria	c__Betaproteobacteria	o__Burkholderiales	f__Alcaligenaceae	Unclass_Alcaligenaceae	Unclass_Alcaligenaceae
sk__Bacteria	k__Bacteria	p__Proteobacteria	c__Betaproteobacteria	o__Burkholderiales	f__Comamonadaceae	g__Acidovorax	Unclass_Acidovorax
sk__Bacteria	k__Bacteria	p__Proteobacteria	c__Betaproteobacteria	o__Burkholderiales	f__Comamonadaceae	g__Alicycliphilus	Unclass_Alicycliphilus
sk__Bacteria	k__Bacteria	p__Proteobacteria	c__Betaproteobacteria	o__Burkholderiales	f__Comamonadaceae	g__Delftia	Unclass_Delftia
sk__Bacteria	k__Bacteria	p__Proteobacteria	c__Betaproteobacteria	o__Neisseriales	f__Neisseriaceae	g__Alysiella	Unclass_Alysiella
sk__Bacteria	k__Bacteria	p__Proteobacteria	c__Betaproteobacteria	o__Neisseriales	f__Neisseriaceae	g__Vitreoscilla	Unclass_Vitreoscilla
sk__Bacteria	k__Bacteria	p__Proteobacteria	c__Betaproteobacteria	o__Rhodocyclales	f__Rhodocyclaceae	g__Dechlorobacter	Unclass_Dechlorobacter
sk__Bacteria	k__Bacteria	p__Proteobacteria	c__Betaproteobacteria	o__Rhodocyclales	f__Zoogloeaceae	Unclass_Zoogloeaceae	Unclass_Zoogloeaceae
sk__Bacteria	k__Bacteria	p__Proteobacteria	c__Betaproteobacteria	o__Rhodocyclales	f__Zoogloeaceae	g__Azoarcus	Unclass_Azoarcus
sk__Bacteria	k__Bacteria	p__Proteobacteria	c__Betaproteobacteria	o__Rhodocyclales	f__Zoogloeaceae	g__Thauera	Unclass_Thauera
sk__Bacteria	k__Bacteria	p__Proteobacteria	c__Deltaproteobacteria	o__Desulfovibrionales	f__Desulfovibrionaceae	g__Mailhella	Unclass_Mailhella
sk__Bacteria	k__Bacteria	p__Proteobacteria	c__Deltaproteobacteria	o__Desulfuromonadales	f__Geobacteraceae	g__Geothermobacter	Unclass_Geothermobacter
sk__Bacteria	k__Bacteria	p__Proteobacteria	c__Gammaproteobacteria	Unclass_Gammaproteobacteria	f__Competibacteraceae	Unclass_Competibacteraceae	Unclass_Competibacteraceae
sk__Bacteria	k__Bacteria	p__Proteobacteria	c__Gammaproteobacteria	o__Aeromonadales	f__Succinivibrionaceae	g__Succinatimonas	Unclass_Succinatimonas
sk__Bacteria	k__Bacteria	p__Proteobacteria	c__Gammaproteobacteria	o__Alteromonadales	f__Pseudoalteromonadaceae	g__Pseudoalteromonas	Unclass_Pseudoalteromonas
sk__Bacteria	k__Bacteria	p__Proteobacteria	c__Gammaproteobacteria	o__Alteromonadales	f__Psychromonadaceae	g__Psychromonas	Unclass_Psychromonas
sk__Bacteria	k__Bacteria	p__Proteobacteria	c__Gammaproteobacteria	o__Chromatiales	f__Woeseiaceae	g__Woeseia	Unclass_Woeseia
sk__Bacteria	k__Bacteria	p__Proteobacteria	c__Gammaproteobacteria	o__Enterobacterales	f__Enterobacteriaceae	g__Candidatus_Rosenkranzia	Unclass_Candidatus_Rosenkranzia
sk__Bacteria	k__Bacteria	p__Proteobacteria	c__Gammaproteobacteria	o__Oceanospirillales	f__Oceanospirillaceae	g__Marinomonas	Unclass_Marinomonas
sk__Bacteria	k__Bacteria	p__Proteobacteria	c__Gammaproteobacteria	o__Pseudomonadales	f__Moraxellaceae	g__Acinetobacter	s__Acinetobacter_baumannii
sk__Bacteria	k__Bacteria	p__Proteobacteria	c__Gammaproteobacteria	o__Pseudomonadales	f__Moraxellaceae	g__Acinetobacter	s__Acinetobacter_sp.
sk__Bacteria	k__Bacteria	p__Proteobacteria	c__Gammaproteobacteria	o__Pseudomonadales	f__Moraxellaceae	g__Alkanindiges	Unclass_Alkanindiges
sk__Bacteria	k__Bacteria	p__Proteobacteria	c__Gammaproteobacteria	o__Thiotrichales	f__Thiotrichaceae	g__Candidatus_Parabeggiatoa	Unclass_Candidatus_Parabeggiatoa
sk__Bacteria	k__Bacteria	p__Proteobacteria	c__Gammaproteobacteria	o__Xanthomonadales	f__Rhodanobacteraceae	g__Dokdonella	Unclass_Dokdonella
sk__Bacteria	k__Bacteria	p__Proteobacteria	c__Zetaproteobacteria	o__Mariprofundales	Unclass_Mariprofundales	Unclass_Mariprofundales	Unclass_Mariprofundales
sk__Bacteria	k__Bacteria	p__Synergistetes	Unclass_Synergistetes	Unclass_Synergistetes	Unclass_Synergistetes	Unclass_Synergistetes	Unclass_Synergistetes
sk__Bacteria	k__Bacteria	p__Tenericutes	c__Mollicutes	o__Acholeplasmatales	f__Acholeplasmataceae	Unclass_Acholeplasmataceae	Unclass_Acholeplasmataceae
sk__Eukaryota	k__Eukaryota	Unclass_Eukaryota	Unclass_Eukaryota	o__Thaumatomonadida	f__Thaumatomastigidae	g__Protaspis	Unclass_Protaspis
sk__Eukaryota	k__Eukaryota	Unclass_Eukaryota	c__Cryptophyta	o__Cryptomonadales	f__Goniomonadaceae	g__Goniomonas	s__Goniomonas_sp._SH-9
sk__Bacteria	k__Bacteria	Unclass_Bacteria	Unclass_Bacteria	Unclass_Bacteria	Unclass_Bacteria	Unclass_Bacteria	s__intestinal_bacterium_CG19-1
sk__Bacteria	k__Bacteria	p__Acidobacteria	c__Solibacteres	o__Solibacterales	f__Bryobacteraceae	Unclass_Bryobacteraceae	Unclass_Bryobacteraceae
sk__Bacteria	k__Bacteria	p__Actinobacteria	c__Actinobacteria	o__Corynebacteriales	f__Corynebacteriaceae	g__Corynebacterium	s__Corynebacterium_kroppenstedtii
sk__Bacteria	k__Bacteria	p__Actinobacteria	c__Actinobacteria	o__Micrococcales	f__Dermatophilaceae	g__Piscicoccus	Unclass_Piscicoccus
sk__Bacteria	k__Bacteria	p__Actinobacteria	c__Actinobacteria	o__Micrococcales	f__Microbacteriaceae	g__Agromyces	Unclass_Agromyces
sk__Bacteria	k__Bacteria	p__Actinobacteria	c__Actinobacteria	o__Micrococcales	f__Sanguibacteraceae	g__Sanguibacter	Unclass_Sanguibacter
sk__Bacteria	k__Bacteria	p__Actinobacteria	c__Actinobacteria	o__Propionibacteriales	f__Propionibacteriaceae	g__Propioniciclava	s__Propioniciclava_sp._SCSIO_13291
sk__Bacteria	k__Bacteria	p__Actinobacteria	c__Coriobacteriia	o__Coriobacteriales	f__Coriobacteriaceae	g__Enorma	Unclass_Enorma
sk__Bacteria	k__Bacteria	p__Actinobacteria	c__Coriobacteriia	o__Eggerthellales	f__Eggerthellaceae	g__Paraeggerthella	Unclass_Paraeggerthella
sk__Bacteria	k__Bacteria	p__Actinobacteria	c__Nitriliruptoria	o__Euzebyales	f__Euzebyaceae	Unclass_Euzebyaceae	Unclass_Euzebyaceae
sk__Bacteria	k__Bacteria	p__Bacteroidetes	c__Sphingobacteriia	o__Sphingobacteriales	f__Sphingobacteriaceae	g__Nubsella	Unclass_Nubsella
sk__Bacteria	k__Bacteria	p__Bacteroidetes	c__Sphingobacteriia	o__Sphingobacteriales	f__Sphingobacteriaceae	g__Pedobacter	Unclass_Pedobacter
sk__Bacteria	k__Bacteria	p__Bacteroidetes	c__Sphingobacteriia	o__Sphingobacteriales	f__Sphingobacteriaceae	g__Pedobacter	s__Pedobacter_terricola
sk__Bacteria	k__Bacteria	p__Firmicutes	c__Clostridia	o__Clostridiales	Unclass_Clostridiales	Unclass_Clostridiales	s__Clostridiales_bacterium_60-7e
sk__Bacteria	k__Bacteria	p__Firmicutes	c__Clostridia	o__Clostridiales	f__Caldicoprobacteraceae	g__Caldicoprobacter	Unclass_Caldicoprobacter
sk__Bacteria	k__Bacteria	p__Firmicutes	c__Clostridia	o__Clostridiales	f__Clostridiaceae	g__Butyricicoccus	s__Butyricicoccus_faecihominis
sk__Bacteria	k__Bacteria	p__Firmicutes	c__Clostridia	o__Clostridiales	f__Clostridiaceae	g__Lactonifactor	Unclass_Lactonifactor
sk__Bacteria	k__Bacteria	p__Firmicutes	c__Clostridia	o__Clostridiales	f__Lachnospiraceae	Unclass_Lachnospiraceae	s__Lachnospiraceae_bacterium_1_4_56FAA
sk__Bacteria	k__Bacteria	p__Firmicutes	c__Clostridia	o__Clostridiales	f__Lachnospiraceae	g__Coprococcus	s__Coprococcus_catus
sk__Bacteria	k__Bacteria	p__Firmicutes	c__Clostridia	o__Clostridiales	f__Lachnospiraceae	g__Pseudobutyrivibrio	s__Pseudobutyrivibrio_sp._CA38
sk__Bacteria	k__Bacteria	p__Firmicutes	c__Clostridia	o__Clostridiales	f__Lachnospiraceae	g__Roseburia	s__Roseburia_sp._1120
sk__Bacteria	k__Bacteria	p__Firmicutes	c__Clostridia	o__Clostridiales	f__Ruminococcaceae	g__Ruminococcus	s__Ruminococcus_sp._RLB3
sk__Bacteria	k__Bacteria	p__Firmicutes	c__Clostridia	o__Clostridiales	f__Ruminococcaceae	g__Ruminococcus	s__Ruminococcus_sp._W22
sk__Bacteria	k__Bacteria	p__Firmicutes	c__Clostridia	o__Natranaerobiales	Unclass_Natranaerobiales	Unclass_Natranaerobiales	Unclass_Natranaerobiales
sk__Bacteria	k__Bacteria	p__Firmicutes	c__Clostridia	o__Thermoanaerobacterales	f__Thermoanaerobacterales_Family_III._Incertae_Sedis	Unclass_Thermoanaerobacterales_Family_III._Incertae_Sedis	Unclass_Thermoanaerobacterales_Family_III._Incertae_Sedis
sk__Bacteria	k__Bacteria	p__Firmicutes	c__Erysipelotrichia	o__Erysipelotrichales	f__Erysipelotrichaceae	g__Faecalibaculum	Unclass_Faecalibaculum
sk__Bacteria	k__Bacteria	p__Firmicutes	c__Erysipelotrichia	o__Erysipelotrichales	f__Erysipelotrichaceae	g__Faecalitalea	Unclass_Faecalitalea
sk__Bacteria	k__Bacteria	p__Firmicutes	c__Erysipelotrichia	o__Erysipelotrichales	f__Erysipelotrichaceae	g__Merdibacter	Unclass_Merdibacter
sk__Bacteria	k__Bacteria	p__Gemmatimonadetes	c__Gemmatimonadetes	o__Gemmatimonadales	f__Gemmatimonadaceae	g__Gemmatirosa	Unclass_Gemmatirosa
sk__Bacteria	k__Bacteria	p__Proteobacteria	c__Alphaproteobacteria	o__Rhizobiales	f__Methylobacteriaceae	g__Microvirga	Unclass_Microvirga
sk__Bacteria	k__Bacteria	p__Proteobacteria	c__Betaproteobacteria	o__Burkholderiales	Unclass_Burkholderiales	g__Sphaerotilus	s__Sphaerotilus_natans
sk__Bacteria	k__Bacteria	p__Proteobacteria	c__Deltaproteobacteria	o__Desulfarculales	f__Desulfarculaceae	Unclass_Desulfarculaceae	Unclass_Desulfarculaceae
sk__Bacteria	k__Bacteria	p__Proteobacteria	c__Deltaproteobacteria	o__Desulfovibrionales	f__Desulfomicrobiaceae	Unclass_Desulfomicrobiaceae	Unclass_Desulfomicrobiaceae
sk__Bacteria	k__Bacteria	p__Proteobacteria	c__Deltaproteobacteria	o__Myxococcales	f__Kofleriaceae	Unclass_Kofleriaceae	Unclass_Kofleriaceae
sk__Bacteria	k__Bacteria	p__Proteobacteria	c__Deltaproteobacteria	o__Syntrophobacterales	Unclass_Syntrophobacterales	Unclass_Syntrophobacterales	Unclass_Syntrophobacterales
sk__Bacteria	k__Bacteria	p__Proteobacteria	c__Gammaproteobacteria	o__Chromatiales	f__Chromatiaceae	g__Candidatus_Thiosymbion	Unclass_Candidatus_Thiosymbion
sk__Bacteria	k__Bacteria	p__Proteobacteria	c__Gammaproteobacteria	o__Pseudomonadales	f__Pseudomonadaceae	g__Oblitimonas	Unclass_Oblitimonas
sk__Bacteria	k__Bacteria	p__Proteobacteria	c__Oligoflexia	o__Bdellovibrionales	f__Bdellovibrionaceae	g__Bdellovibrio	s__Bdellovibrio_sp._SRP1
sk__Bacteria	k__Bacteria	p__Spirochaetes	c__Spirochaetia	Unclass_Spirochaetia	Unclass_Spirochaetia	Unclass_Spirochaetia	Unclass_Spirochaetia
sk__Bacteria	k__Bacteria	Unclass_Bacteria	Unclass_Bacteria	Unclass_Bacteria	Unclass_Bacteria	Unclass_Bacteria	s__bacterium_AC2042
sk__Bacteria	k__Bacteria	Unclass_Bacteria	Unclass_Bacteria	Unclass_Bacteria	Unclass_Bacteria	Unclass_Bacteria	s__bacterium_NLAE-zl-C533
sk__Bacteria	k__Bacteria	Unclass_Bacteria	Unclass_Bacteria	Unclass_Bacteria	Unclass_Bacteria	Unclass_Bacteria	s__bacterium_WCE2003
sk__Bacteria	k__Bacteria	Unclass_Bacteria	Unclass_Bacteria	Unclass_Bacteria	Unclass_Bacteria	Unclass_Bacteria	s__bacterium_mpn-isolate_group_3
sk__Bacteria	k__Bacteria	p__Actinobacteria	c__Actinobacteria	o__Acidothermales	f__Acidothermaceae	Unclass_Acidothermaceae	Unclass_Acidothermaceae
sk__Bacteria	k__Bacteria	p__Actinobacteria	c__Actinobacteria	o__Bifidobacteriales	f__Bifidobacteriaceae	g__Alloscardovia	Unclass_Alloscardovia
sk__Bacteria	k__Bacteria	p__Actinobacteria	c__Actinobacteria	o__Bifidobacteriales	f__Bifidobacteriaceae	g__Bifidobacterium	s__Bifidobacterium_bifidum
sk__Bacteria	k__Bacteria	p__Actinobacteria	c__Actinobacteria	o__Bifidobacteriales	f__Bifidobacteriaceae	g__Bifidobacterium	s__Bifidobacterium_pullorum
sk__Bacteria	k__Bacteria	p__Actinobacteria	c__Actinobacteria	o__Geodermatophilales	f__Geodermatophilaceae	Unclass_Geodermatophilaceae	Unclass_Geodermatophilaceae
sk__Bacteria	k__Bacteria	p__Actinobacteria	c__Actinobacteria	o__Micrococcales	f__Brevibacteriaceae	g__Brevibacterium	s__Brevibacterium_luteolum
sk__Bacteria	k__Bacteria	p__Actinobacteria	c__Actinobacteria	o__Micrococcales	f__Microbacteriaceae	g__Leucobacter	Unclass_Leucobacter
sk__Bacteria	k__Bacteria	p__Actinobacteria	c__Actinobacteria	o__Micrococcales	f__Sanguibacteraceae	Unclass_Sanguibacteraceae	Unclass_Sanguibacteraceae
sk__Bacteria	k__Bacteria	p__Actinobacteria	c__Actinobacteria	o__Micromonosporales	f__Micromonosporaceae	g__Longispora	Unclass_Longispora
sk__Bacteria	k__Bacteria	p__Actinobacteria	c__Coriobacteriia	o__Coriobacteriales	f__Coriobacteriaceae	g__Collinsella	s__Collinsella_phocaeensis
sk__Bacteria	k__Bacteria	p__Actinobacteria	c__Thermoleophilia	Unclass_Thermoleophilia	Unclass_Thermoleophilia	Unclass_Thermoleophilia	Unclass_Thermoleophilia
sk__Bacteria	k__Bacteria	p__Bacteroidetes	c__Bacteroidia	o__Bacteroidales	f__Bacteroidaceae	Unclass_Bacteroidaceae	s__Bacteroidaceae_bacterium_DJF_B220
sk__Bacteria	k__Bacteria	p__Candidatus_Peregrinibacteria	c__Candidatus_Peribacteria	Unclass_Candidatus_Peribacteria	Unclass_Candidatus_Peribacteria	Unclass_Candidatus_Peribacteria	Unclass_Candidatus_Peribacteria
sk__Bacteria	k__Bacteria	p__Chloroflexi	c__Ktedonobacteria	Unclass_Ktedonobacteria	Unclass_Ktedonobacteria	Unclass_Ktedonobacteria	Unclass_Ktedonobacteria
sk__Bacteria	k__Bacteria	p__Deferribacteres	c__Deferribacteres	o__Deferribacterales	Unclass_Deferribacterales	Unclass_Deferribacterales	Unclass_Deferribacterales
sk__Bacteria	k__Bacteria	p__Firmicutes	c__Clostridia	o__Clostridiales	Unclass_Clostridiales	Unclass_Clostridiales	s__Clostridiales_bacterium_enrichment_culture_clone_WSC-23
sk__Bacteria	k__Bacteria	p__Firmicutes	c__Clostridia	o__Clostridiales	f__Lachnospiraceae	g__Acetatifactor	Unclass_Acetatifactor
sk__Bacteria	k__Bacteria	p__Firmicutes	c__Clostridia	o__Clostridiales	f__Peptococcaceae	g__Cryptanaerobacter	Unclass_Cryptanaerobacter
sk__Bacteria	k__Bacteria	p__Firmicutes	c__Clostridia	o__Clostridiales	f__Ruminococcaceae	Unclass_Ruminococcaceae	s__Ruminococcaceae_bacterium_Marseille-P3738
sk__Bacteria	k__Bacteria	p__Firmicutes	c__Clostridia	o__Clostridiales	f__Ruminococcaceae	g__Ruminococcus	s__Ruminococcus_sp._653
sk__Bacteria	k__Bacteria	p__Firmicutes	c__Clostridia	o__Halanaerobiales	f__Halanaerobiaceae	Unclass_Halanaerobiaceae	Unclass_Halanaerobiaceae
sk__Bacteria	k__Bacteria	p__Firmicutes	c__Clostridia	o__Natranaerobiales	f__Natranaerobiaceae	Unclass_Natranaerobiaceae	Unclass_Natranaerobiaceae
sk__Bacteria	k__Bacteria	p__Firmicutes	c__Erysipelotrichia	o__Erysipelotrichales	f__Erysipelotrichaceae	g__Breznakia	Unclass_Breznakia
sk__Bacteria	k__Bacteria	p__Firmicutes	c__Limnochordia	o__Limnochordales	f__Limnochordaceae	Unclass_Limnochordaceae	Unclass_Limnochordaceae
sk__Bacteria	k__Bacteria	p__Firmicutes	c__Negativicutes	o__Acidaminococcales	f__Acidaminococcaceae	g__Phascolarctobacterium	s__Phascolarctobacterium_sp._377
sk__Bacteria	k__Bacteria	p__Firmicutes	c__Negativicutes	o__Acidaminococcales	f__Acidaminococcaceae	g__Phascolarctobacterium	s__Phascolarctobacterium_sp._canine_oral_taxon_212
sk__Bacteria	k__Bacteria	p__Firmicutes	c__Negativicutes	o__Acidaminococcales	f__Acidaminococcaceae	g__Succiniclasticum	Unclass_Succiniclasticum
sk__Bacteria	k__Bacteria	p__Firmicutes	c__Negativicutes	o__Veillonellales	f__Veillonellaceae	g__Dialister	s__Dialister_succinatiphilus
sk__Bacteria	k__Bacteria	p__Firmicutes	c__Negativicutes	o__Veillonellales	f__Veillonellaceae	g__Veillonella	s__Veillonella_atypica
sk__Bacteria	k__Bacteria	p__Firmicutes	c__Negativicutes	o__Veillonellales	f__Veillonellaceae	g__Veillonella	s__Veillonella_sp._2011_Ileo_VSA_F2
sk__Bacteria	k__Bacteria	p__Fusobacteria	c__Fusobacteriia	o__Fusobacteriales	f__Leptotrichiaceae	g__Sneathia	Unclass_Sneathia
sk__Bacteria	k__Bacteria	p__Ignavibacteriae	Unclass_Ignavibacteriae	Unclass_Ignavibacteriae	Unclass_Ignavibacteriae	Unclass_Ignavibacteriae	Unclass_Ignavibacteriae
sk__Bacteria	k__Bacteria	p__Nitrospinae	Unclass_Nitrospinae	Unclass_Nitrospinae	Unclass_Nitrospinae	Unclass_Nitrospinae	Unclass_Nitrospinae
sk__Bacteria	k__Bacteria	p__Planctomycetes	c__Planctomycetia	o__Planctomycetales	f__Isosphaeraceae	Unclass_Isosphaeraceae	Unclass_Isosphaeraceae
sk__Bacteria	k__Bacteria	p__Proteobacteria	c__Alphaproteobacteria	o__Rhizobiales	f__Rhizobiaceae	g__Kaistia	s__Kaistia_sp._TBD058
sk__Bacteria	k__Bacteria	p__Proteobacteria	c__Alphaproteobacteria	o__Rhodobacterales	f__Hyphomonadaceae	g__Hellea	Unclass_Hellea
sk__Bacteria	k__Bacteria	p__Proteobacteria	c__Alphaproteobacteria	o__Rhodobacterales	f__Rhodobacteraceae	g__Pseudoruegeria	s__Pseudoruegeria_marinistellae
sk__Bacteria	k__Bacteria	p__Proteobacteria	c__Alphaproteobacteria	o__Rhodospirillales	f__Geminicoccaceae	Unclass_Geminicoccaceae	Unclass_Geminicoccaceae
sk__Bacteria	k__Bacteria	p__Proteobacteria	c__Alphaproteobacteria	o__Sphingomonadales	f__Erythrobacteraceae	g__Erythrobacter	Unclass_Erythrobacter
sk__Bacteria	k__Bacteria	p__Proteobacteria	c__Betaproteobacteria	Unclass_Betaproteobacteria	Unclass_Betaproteobacteria	g__Candidatus_Accumulibacter	Unclass_Candidatus_Accumulibacter
sk__Bacteria	k__Bacteria	p__Proteobacteria	c__Betaproteobacteria	o__Burkholderiales	f__Comamonadaceae	g__Rhodoferax	Unclass_Rhodoferax
sk__Bacteria	k__Bacteria	p__Proteobacteria	c__Betaproteobacteria	o__Rhodocyclales	f__Azonexaceae	Unclass_Azonexaceae	Unclass_Azonexaceae
sk__Bacteria	k__Bacteria	p__Proteobacteria	c__Deltaproteobacteria	o__Desulfuromonadales	f__Desulfuromonadaceae	Unclass_Desulfuromonadaceae	Unclass_Desulfuromonadaceae
sk__Bacteria	k__Bacteria	p__Proteobacteria	c__Deltaproteobacteria	o__Myxococcales	f__Anaeromyxobacteraceae	g__Anaeromyxobacter	Unclass_Anaeromyxobacter
sk__Bacteria	k__Bacteria	p__Proteobacteria	c__Epsilonproteobacteria	o__Campylobacterales	f__Campylobacteraceae	g__Sulfurospirillum	s__Sulfurospirillum_deleyianum
sk__Bacteria	k__Bacteria	p__Proteobacteria	c__Gammaproteobacteria	o__Pasteurellales	f__Pasteurellaceae	g__Haemophilus	s__Haemophilus_sp._oral_clone_BJ021
sk__Bacteria	k__Bacteria	p__Proteobacteria	c__Gammaproteobacteria	o__Pasteurellales	f__Pasteurellaceae	g__Haemophilus	s__Haemophilus_sputorum
sk__Bacteria	k__Bacteria	p__Proteobacteria	c__Gammaproteobacteria	o__Pasteurellales	f__Pasteurellaceae	g__Mannheimia	s__Mannheimia_haemolytica
sk__Bacteria	k__Bacteria	p__Proteobacteria	c__Gammaproteobacteria	o__Pasteurellales	f__Pasteurellaceae	g__Mesocricetibacter	Unclass_Mesocricetibacter
sk__Bacteria	k__Bacteria	p__Proteobacteria	c__Gammaproteobacteria	o__Pseudomonadales	f__Moraxellaceae	g__Fluviicoccus	Unclass_Fluviicoccus
sk__Bacteria	k__Bacteria	p__Proteobacteria	c__Gammaproteobacteria	o__Vibrionales	f__Vibrionaceae	g__Photobacterium	Unclass_Photobacterium
sk__Bacteria	k__Bacteria	p__Synergistetes	c__Synergistia	Unclass_Synergistia	Unclass_Synergistia	Unclass_Synergistia	Unclass_Synergistia
sk__Bacteria	k__Bacteria	p__Thermodesulfobacteria	c__Thermodesulfobacteria	Unclass_Thermodesulfobacteria	Unclass_Thermodesulfobacteria	Unclass_Thermodesulfobacteria	Unclass_Thermodesulfobacteria
sk__Eukaryota	k__Eukaryota	Unclass_Eukaryota	Unclass_Eukaryota	o__Perkinsida	Unclass_Perkinsida	Unclass_Perkinsida	Unclass_Perkinsida
sk__Eukaryota	k__Eukaryota	Unclass_Eukaryota	c__Chrysophyceae	Unclass_Chrysophyceae	Unclass_Chrysophyceae	Unclass_Chrysophyceae	s__Spumella-like_flagellate_JBNZ43
sk__Eukaryota	k__Eukaryota	Unclass_Eukaryota	c__Chrysophyceae	o__Chromulinales	f__Dinobryaceae	g__Poteriospumella	Unclass_Poteriospumella
sk__Eukaryota	k__Eukaryota	Unclass_Eukaryota	c__Cryptophyta	o__Cryptomonadales	f__Cryptomonadaceae	g__Cryptomonas	Unclass_Cryptomonas
sk__Eukaryota	k__Eukaryota	Unclass_Eukaryota	c__Heterolobosea	o__Schizopyrenida	f__Vahlkampfiidae	g__Naegleria	Unclass_Naegleria
sk__Eukaryota	k__Eukaryota	Unclass_Eukaryota	c__Oligohymenophorea	o__Philasterida	Unclass_Philasterida	Unclass_Philasterida	Unclass_Philasterida
sk__Eukaryota	k__Eukaryota	p__Euglenida	Unclass_Euglenida	o__Sphenomonadales	f__Sphenomonadidae	g__Petalomonas	Unclass_Petalomonas
sk__Eukaryota	k__Fungi	p__Ascomycota	c__Dothideomycetes	o__Pleosporales	f__Pleosporaceae	Unclass_Pleosporaceae	Unclass_Pleosporaceae
sk__Eukaryota	k__Metazoa	p__Arthropoda	c__Insecta	o__Hemiptera	f__Gerridae	g__Gerris	s__Gerris_buenoi
sk__Eukaryota	k__Viridiplantae	p__Chlorophyta	c__Trebouxiophyceae	Unclass_Trebouxiophyceae	Unclass_Trebouxiophyceae	Unclass_Trebouxiophyceae	Unclass_Trebouxiophyceae
sk__Eukaryota	k__Viridiplantae	p__Chlorophyta	c__Trebouxiophyceae	o__Chlorellales	f__Chlorellaceae	Unclass_Chlorellaceae	Unclass_Chlorellaceae
sk__Bacteria	k__Bacteria	Unclass_Bacteria	Unclass_Bacteria	Unclass_Bacteria	Unclass_Bacteria	Unclass_Bacteria	s__bacterium_mpn-isolate_group_19
sk__Bacteria	k__Bacteria	p__Actinobacteria	c__Actinobacteria	o__Corynebacteriales	f__Corynebacteriaceae	g__Corynebacterium	s__Corynebacterium_cystitidis
sk__Bacteria	k__Bacteria	p__Actinobacteria	c__Actinobacteria	o__Corynebacteriales	f__Corynebacteriaceae	g__Corynebacterium	s__Corynebacterium_durum
sk__Bacteria	k__Bacteria	p__Actinobacteria	c__Actinobacteria	o__Micrococcales	f__Dermacoccaceae	g__Dermacoccus	Unclass_Dermacoccus
sk__Bacteria	k__Bacteria	p__Actinobacteria	c__Actinobacteria	o__Micromonosporales	f__Micromonosporaceae	g__Dactylosporangium	Unclass_Dactylosporangium
sk__Bacteria	k__Bacteria	p__Actinobacteria	c__Actinobacteria	o__Propionibacteriales	f__Propionibacteriaceae	g__Propionibacterium	Unclass_Propionibacterium
sk__Bacteria	k__Bacteria	p__Actinobacteria	c__Coriobacteriia	o__Coriobacteriales	f__Coriobacteriaceae	g__Coriobacterium	Unclass_Coriobacterium
sk__Bacteria	k__Bacteria	p__Actinobacteria	c__Coriobacteriia	o__Eggerthellales	f__Eggerthellaceae	g__Cryptobacterium	Unclass_Cryptobacterium
sk__Bacteria	k__Bacteria	p__Actinobacteria	c__Coriobacteriia	o__Eggerthellales	f__Eggerthellaceae	g__Gordonibacter	Unclass_Gordonibacter
sk__Bacteria	k__Bacteria	p__Actinobacteria	c__Rubrobacteria	o__Rubrobacterales	f__Rubrobacteraceae	Unclass_Rubrobacteraceae	Unclass_Rubrobacteraceae
sk__Bacteria	k__Bacteria	p__Bacteroidetes	c__Bacteroidia	o__Bacteroidales	Unclass_Bacteroidales	g__Phocaeicola	Unclass_Phocaeicola
sk__Bacteria	k__Bacteria	p__Bacteroidetes	c__Cytophagia	o__Cytophagales	f__Hymenobacteraceae	g__Rufibacter	Unclass_Rufibacter
sk__Bacteria	k__Bacteria	p__Candidatus_Shapirobacteria	Unclass_Candidatus_Shapirobacteria	Unclass_Candidatus_Shapirobacteria	Unclass_Candidatus_Shapirobacteria	Unclass_Candidatus_Shapirobacteria	Unclass_Candidatus_Shapirobacteria
sk__Bacteria	k__Bacteria	p__Chloroflexi	c__Caldilineae	o__Caldilineales	Unclass_Caldilineales	Unclass_Caldilineales	Unclass_Caldilineales
sk__Bacteria	k__Bacteria	p__Cyanobacteria	Unclass_Cyanobacteria	o__Synechococcales	Unclass_Synechococcales	Unclass_Synechococcales	Unclass_Synechococcales
sk__Bacteria	k__Bacteria	p__Deinococcus-Thermus	c__Deinococci	o__Deinococcales	f__Trueperaceae	g__Truepera	Unclass_Truepera
sk__Bacteria	k__Bacteria	p__Firmicutes	c__Bacilli	o__Bacillales	Unclass_Bacillales	g__Desulfuribacillus	Unclass_Desulfuribacillus
sk__Bacteria	k__Bacteria	p__Firmicutes	c__Bacilli	o__Bacillales	f__Bacillaceae	g__Oceanobacillus	Unclass_Oceanobacillus
sk__Bacteria	k__Bacteria	p__Firmicutes	c__Bacilli	o__Bacillales	f__Bacillales_Family_X._Incertae_Sedis	Unclass_Bacillales_Family_X._Incertae_Sedis	Unclass_Bacillales_Family_X._Incertae_Sedis
sk__Bacteria	k__Bacteria	p__Firmicutes	c__Bacilli	o__Bacillales	f__Planococcaceae	g__Sporosarcina	Unclass_Sporosarcina
sk__Bacteria	k__Bacteria	p__Firmicutes	c__Bacilli	o__Bacillales	f__Sporolactobacillaceae	g__Sporolactobacillus	Unclass_Sporolactobacillus
sk__Bacteria	k__Bacteria	p__Firmicutes	c__Bacilli	o__Lactobacillales	f__Aerococcaceae	g__Aerococcus	s__Aerococcus_vaginalis
sk__Bacteria	k__Bacteria	p__Firmicutes	c__Bacilli	o__Lactobacillales	f__Carnobacteriaceae	g__Marinilactibacillus	Unclass_Marinilactibacillus
sk__Bacteria	k__Bacteria	p__Firmicutes	c__Bacilli	o__Lactobacillales	f__Streptococcaceae	g__Streptococcus	s__Streptococcus_mutans
sk__Bacteria	k__Bacteria	p__Firmicutes	c__Clostridia	o__Clostridiales	f__Clostridiaceae	g__Candidatus_Arthromitus	Unclass_Candidatus_Arthromitus
sk__Bacteria	k__Bacteria	p__Firmicutes	c__Clostridia	o__Clostridiales	f__Clostridiales_Family_XII._Incertae_Sedis	g__Guggenheimella	Unclass_Guggenheimella
sk__Bacteria	k__Bacteria	p__Firmicutes	c__Clostridia	o__Clostridiales	f__Lachnospiraceae	g__Marvinbryantia	s__Marvinbryantia_formatexigens
sk__Bacteria	k__Bacteria	p__Firmicutes	c__Clostridia	o__Clostridiales	f__Peptostreptococcaceae	g__Proteocatella	Unclass_Proteocatella
sk__Bacteria	k__Bacteria	p__Firmicutes	c__Clostridia	o__Clostridiales	f__Peptostreptococcaceae	g__Terrisporobacter	Unclass_Terrisporobacter
sk__Bacteria	k__Bacteria	p__Firmicutes	c__Clostridia	o__Clostridiales	f__Ruminococcaceae	g__Saccharofermentans	s__Saccharofermentans_acetigenes
sk__Bacteria	k__Bacteria	p__Firmicutes	c__Negativicutes	Unclass_Negativicutes	Unclass_Negativicutes	g__Quinella	Unclass_Quinella
sk__Bacteria	k__Bacteria	p__Firmicutes	c__Negativicutes	o__Acidaminococcales	f__Acidaminococcaceae	g__Acidaminococcus	Unclass_Acidaminococcus
sk__Bacteria	k__Bacteria	p__Firmicutes	c__Negativicutes	o__Selenomonadales	f__Selenomonadaceae	g__Selenomonas	s__Selenomonas_sputigena
sk__Bacteria	k__Bacteria	p__Firmicutes	c__Negativicutes	o__Selenomonadales	f__Sporomusaceae	g__Anaerospora	Unclass_Anaerospora
sk__Bacteria	k__Bacteria	p__Firmicutes	c__Negativicutes	o__Veillonellales	f__Veillonellaceae	g__Veillonella	s__Veillonella_magna
sk__Bacteria	k__Bacteria	p__Firmicutes	c__Tissierellia	Unclass_Tissierellia	Unclass_Tissierellia	g__Dethiosulfatibacter	Unclass_Dethiosulfatibacter
sk__Bacteria	k__Bacteria	p__Firmicutes	c__Tissierellia	o__Tissierellales	f__Gottschalkiaceae	Unclass_Gottschalkiaceae	Unclass_Gottschalkiaceae
sk__Bacteria	k__Bacteria	p__Firmicutes	c__Tissierellia	o__Tissierellales	f__Tissierellaceae	g__Tissierella	Unclass_Tissierella
sk__Bacteria	k__Bacteria	p__Proteobacteria	c__Alphaproteobacteria	o__Caulobacterales	f__Caulobacteraceae	g__Asticcacaulis	Unclass_Asticcacaulis
sk__Bacteria	k__Bacteria	p__Proteobacteria	c__Alphaproteobacteria	o__Sphingomonadales	f__Sphingomonadaceae	g__Sphingobium	Unclass_Sphingobium
sk__Bacteria	k__Bacteria	p__Proteobacteria	c__Betaproteobacteria	o__Burkholderiales	Unclass_Burkholderiales	g__Tepidimonas	Unclass_Tepidimonas
sk__Bacteria	k__Bacteria	p__Proteobacteria	c__Deltaproteobacteria	o__Desulfovibrionales	f__Desulfovibrionaceae	g__Desulfovibrio	s__Desulfovibrio_sp._enrichment_culture_clone_Jdgsrb034
sk__Bacteria	k__Bacteria	p__Proteobacteria	c__Deltaproteobacteria	o__Myxococcales	f__Archangiaceae	Unclass_Archangiaceae	Unclass_Archangiaceae
sk__Bacteria	k__Bacteria	p__Proteobacteria	c__Gammaproteobacteria	o__Cellvibrionales	f__Halieaceae	g__Halioglobus	Unclass_Halioglobus
sk__Bacteria	k__Bacteria	p__Proteobacteria	c__Gammaproteobacteria	o__Enterobacterales	f__Enterobacteriaceae	g__Candidatus_Stammerula	Unclass_Candidatus_Stammerula
sk__Bacteria	k__Bacteria	p__Proteobacteria	c__Gammaproteobacteria	o__Enterobacterales	f__Enterobacteriaceae	g__Izhakiella	Unclass_Izhakiella
sk__Bacteria	k__Bacteria	p__Proteobacteria	c__Gammaproteobacteria	o__Enterobacterales	f__Pectobacteriaceae	g__Pectobacterium	Unclass_Pectobacterium
sk__Bacteria	k__Bacteria	p__Proteobacteria	c__Gammaproteobacteria	o__Legionellales	f__Coxiellaceae	g__Aquicella	Unclass_Aquicella
sk__Bacteria	k__Bacteria	p__Spirochaetes	c__Spirochaetia	o__Spirochaetales	f__Spirochaetaceae	g__Treponema	s__Treponema_pectinovorum
sk__Bacteria	k__Bacteria	p__Verrucomicrobia	c__Methylacidiphilae	o__Methylacidiphilales	Unclass_Methylacidiphilales	Unclass_Methylacidiphilales	Unclass_Methylacidiphilales
sk__Bacteria	k__Bacteria	p__Verrucomicrobia	c__Spartobacteria	Unclass_Spartobacteria	Unclass_Spartobacteria	Unclass_Spartobacteria	Unclass_Spartobacteria
sk__Bacteria	k__Bacteria	p__Verrucomicrobia	c__Verrucomicrobiae	o__Verrucomicrobiales	f__Rubritaleaceae	Unclass_Rubritaleaceae	Unclass_Rubritaleaceae
sk__Eukaryota	k__Viridiplantae	Unclass_Viridiplantae	Unclass_Viridiplantae	Unclass_Viridiplantae	Unclass_Viridiplantae	Unclass_Viridiplantae	Unclass_Viridiplantae
sk__Bacteria	k__Bacteria	Unclass_Bacteria	Unclass_Bacteria	Unclass_Bacteria	Unclass_Bacteria	Unclass_Bacteria	s__bacterium_TOPO-YPDclone7A
sk__Bacteria	k__Bacteria	p__Actinobacteria	c__Actinobacteria	o__Bifidobacteriales	f__Bifidobacteriaceae	g__Scardovia	Unclass_Scardovia
sk__Bacteria	k__Bacteria	p__Actinobacteria	c__Actinobacteria	o__Bifidobacteriales	f__Bifidobacteriaceae	g__Scardovia	s__Scardovia_inopinata
sk__Bacteria	k__Bacteria	p__Actinobacteria	c__Actinobacteria	o__Micrococcales	f__Micrococcaceae	g__Rothia	s__Rothia_aeria
sk__Bacteria	k__Bacteria	p__Actinobacteria	c__Actinobacteria	o__Micromonosporales	f__Micromonosporaceae	g__Luedemannella	Unclass_Luedemannella
sk__Bacteria	k__Bacteria	p__Bacteroidetes	c__Bacteroidia	o__Bacteroidales	Unclass_Bacteroidales	Unclass_Bacteroidales	s__Bacteroidales_genomosp._P2_oral_clone_MB1_G13
sk__Bacteria	k__Bacteria	p__Bacteroidetes	c__Bacteroidia	o__Marinilabiliales	f__Prolixibacteraceae	g__Roseimarinus	Unclass_Roseimarinus
sk__Bacteria	k__Bacteria	p__Bacteroidetes	c__Flavobacteriia	o__Flavobacteriales	f__Flavobacteriaceae	g__Capnocytophaga	s__Capnocytophaga_ochracea
sk__Bacteria	k__Bacteria	p__Bacteroidetes	c__Flavobacteriia	o__Flavobacteriales	f__Flavobacteriaceae	g__Maritimimonas	Unclass_Maritimimonas
sk__Bacteria	k__Bacteria	p__Deinococcus-Thermus	Unclass_Deinococcus-Thermus	Unclass_Deinococcus-Thermus	Unclass_Deinococcus-Thermus	Unclass_Deinococcus-Thermus	Unclass_Deinococcus-Thermus
sk__Bacteria	k__Bacteria	p__Firmicutes	c__Bacilli	o__Lactobacillales	f__Enterococcaceae	g__Bavariicoccus	s__Bavariicoccus_seileri
sk__Bacteria	k__Bacteria	p__Firmicutes	c__Bacilli	o__Lactobacillales	f__Enterococcaceae	g__Enterococcus	s__Enterococcus_italicus
sk__Bacteria	k__Bacteria	p__Firmicutes	c__Bacilli	o__Lactobacillales	f__Lactobacillaceae	g__Lactobacillus	s__Lactobacillus_coryniformis
sk__Bacteria	k__Bacteria	p__Firmicutes	c__Clostridia	o__Clostridiales	f__Clostridiaceae	g__Alkaliphilus	s__Alkaliphilus_sp._LacT
sk__Bacteria	k__Bacteria	p__Firmicutes	c__Clostridia	o__Clostridiales	f__Eubacteriaceae	g__Acetobacterium	s__Acetobacterium_woodii
sk__Bacteria	k__Bacteria	p__Firmicutes	c__Negativicutes	o__Selenomonadales	f__Selenomonadaceae	g__Selenomonas	s__Selenomonas_noxia
sk__Bacteria	k__Bacteria	p__Fusobacteria	c__Fusobacteriia	o__Fusobacteriales	f__Fusobacteriaceae	g__Fusobacterium	s__Fusobacterium_nucleatum
sk__Bacteria	k__Bacteria	p__Fusobacteria	c__Fusobacteriia	o__Fusobacteriales	f__Leptotrichiaceae	g__Leptotrichia	s__Leptotrichia_sp._oral_clone_FP036
sk__Bacteria	k__Bacteria	p__Fusobacteria	c__Fusobacteriia	o__Fusobacteriales	f__Leptotrichiaceae	g__Leptotrichia	s__Leptotrichia_sp._oral_taxon_212
sk__Bacteria	k__Bacteria	p__Fusobacteria	c__Fusobacteriia	o__Fusobacteriales	f__Leptotrichiaceae	g__Leptotrichia	s__Leptotrichia_sp._oral_taxon_847
sk__Bacteria	k__Bacteria	p__Proteobacteria	c__Alphaproteobacteria	o__Kiloniellales	Unclass_Kiloniellales	Unclass_Kiloniellales	Unclass_Kiloniellales
sk__Bacteria	k__Bacteria	p__Proteobacteria	c__Alphaproteobacteria	o__Rhizobiales	f__Bradyrhizobiaceae	g__Bradyrhizobium	Unclass_Bradyrhizobium
sk__Bacteria	k__Bacteria	p__Proteobacteria	c__Alphaproteobacteria	o__Rhizobiales	f__Rhizobiaceae	g__Rhizobium	Unclass_Rhizobium
sk__Bacteria	k__Bacteria	p__Proteobacteria	c__Betaproteobacteria	o__Burkholderiales	Unclass_Burkholderiales	Unclass_Burkholderiales	s__Burkholderiales_bacterium_KMB9
sk__Bacteria	k__Bacteria	p__Proteobacteria	c__Betaproteobacteria	o__Burkholderiales	f__Burkholderiaceae	g__Burkholderia	Unclass_Burkholderia
sk__Bacteria	k__Bacteria	p__Proteobacteria	c__Betaproteobacteria	o__Burkholderiales	f__Burkholderiaceae	g__Candidatus_Glomeribacter	Unclass_Candidatus_Glomeribacter
sk__Bacteria	k__Bacteria	p__Proteobacteria	c__Betaproteobacteria	o__Burkholderiales	f__Burkholderiaceae	g__Polynucleobacter	Unclass_Polynucleobacter
sk__Bacteria	k__Bacteria	p__Proteobacteria	c__Betaproteobacteria	o__Burkholderiales	f__Comamonadaceae	g__Curvibacter	Unclass_Curvibacter
sk__Bacteria	k__Bacteria	p__Proteobacteria	c__Betaproteobacteria	o__Neisseriales	f__Neisseriaceae	g__Conchiformibius	Unclass_Conchiformibius
sk__Bacteria	k__Bacteria	p__Proteobacteria	c__Betaproteobacteria	o__Neisseriales	f__Neisseriaceae	g__Kingella	s__Kingella_genomosp._P1_oral_cone_MB2_C20
sk__Bacteria	k__Bacteria	p__Proteobacteria	c__Betaproteobacteria	o__Neisseriales	f__Neisseriaceae	g__Neisseria	s__Neisseria_elongata
sk__Bacteria	k__Bacteria	p__Proteobacteria	c__Betaproteobacteria	o__Neisseriales	f__Neisseriaceae	g__Neisseria	s__Neisseria_flavescens
sk__Bacteria	k__Bacteria	p__Proteobacteria	c__Betaproteobacteria	o__Neisseriales	f__Neisseriaceae	g__Snodgrassella	Unclass_Snodgrassella
sk__Bacteria	k__Bacteria	p__Proteobacteria	c__Betaproteobacteria	o__Neisseriales	f__Neisseriaceae	g__Stenoxybacter	Unclass_Stenoxybacter
sk__Bacteria	k__Bacteria	p__Proteobacteria	c__Deltaproteobacteria	o__Desulfovibrionales	f__Desulfovibrionaceae	g__Desulfovibrio	s__Desulfovibrio_sp._enrichment_culture_clone_Jdgsrb011
sk__Bacteria	k__Bacteria	p__Proteobacteria	c__Deltaproteobacteria	o__Desulfuromonadales	f__Geobacteraceae	Unclass_Geobacteraceae	Unclass_Geobacteraceae
sk__Bacteria	k__Bacteria	p__Proteobacteria	c__Epsilonproteobacteria	o__Campylobacterales	f__Campylobacteraceae	g__Campylobacter	s__Campylobacter_concisus
sk__Bacteria	k__Bacteria	p__Proteobacteria	c__Gammaproteobacteria	o__Aeromonadales	f__Aeromonadaceae	g__Tolumonas	Unclass_Tolumonas
sk__Bacteria	k__Bacteria	p__Proteobacteria	c__Gammaproteobacteria	o__Alteromonadales	f__Idiomarinaceae	g__Idiomarina	Unclass_Idiomarina
sk__Bacteria	k__Bacteria	p__Proteobacteria	c__Gammaproteobacteria	o__Alteromonadales	f__Shewanellaceae	Unclass_Shewanellaceae	Unclass_Shewanellaceae
sk__Bacteria	k__Bacteria	p__Proteobacteria	c__Gammaproteobacteria	o__Enterobacterales	f__Enterobacteriaceae	g__Escherichia	s__Escherichia_sp.
sk__Bacteria	k__Bacteria	p__Proteobacteria	c__Gammaproteobacteria	o__Enterobacterales	f__Enterobacteriaceae	g__Salmonella	s__Salmonella_enterica
sk__Bacteria	k__Bacteria	p__Proteobacteria	c__Gammaproteobacteria	o__Enterobacterales	f__Morganellaceae	g__Photorhabdus	Unclass_Photorhabdus
sk__Bacteria	k__Bacteria	p__Proteobacteria	c__Gammaproteobacteria	o__Oceanospirillales	f__Halomonadaceae	g__Chromohalobacter	Unclass_Chromohalobacter
sk__Bacteria	k__Bacteria	p__Proteobacteria	c__Gammaproteobacteria	o__Oceanospirillales	f__Oceanospirillaceae	g__Balneatrix	Unclass_Balneatrix
sk__Bacteria	k__Bacteria	p__Proteobacteria	c__Gammaproteobacteria	o__Oceanospirillales	f__Oceanospirillaceae	g__Oleispira	Unclass_Oleispira
sk__Bacteria	k__Bacteria	p__Proteobacteria	c__Gammaproteobacteria	o__Pasteurellales	f__Pasteurellaceae	g__Gallibacterium	Unclass_Gallibacterium
sk__Bacteria	k__Bacteria	p__Proteobacteria	c__Gammaproteobacteria	o__Pasteurellales	f__Pasteurellaceae	g__Pasteurella	s__Pasteurella_multocida
sk__Bacteria	k__Bacteria	p__Proteobacteria	c__Hydrogenophilalia	o__Hydrogenophilales	f__Hydrogenophilaceae	Unclass_Hydrogenophilaceae	Unclass_Hydrogenophilaceae
sk__Archaea	k__Archaea	p__Euryarchaeota	c__Methanomicrobia	o__Methanomicrobiales	Unclass_Methanomicrobiales	Unclass_Methanomicrobiales	Unclass_Methanomicrobiales
sk__Bacteria	k__Bacteria	Unclass_Bacteria	Unclass_Bacteria	Unclass_Bacteria	Unclass_Bacteria	Unclass_Bacteria	s__bacterium_NLAE-zl-G12
sk__Bacteria	k__Bacteria	Unclass_Bacteria	Unclass_Bacteria	Unclass_Bacteria	Unclass_Bacteria	Unclass_Bacteria	s__bacterium_YE56
sk__Bacteria	k__Bacteria	p__Actinobacteria	c__Nitriliruptoria	o__Nitriliruptorales	f__Nitriliruptoraceae	Unclass_Nitriliruptoraceae	Unclass_Nitriliruptoraceae
sk__Bacteria	k__Bacteria	p__Bacteroidetes	c__Bacteroidia	o__Bacteroidales	Unclass_Bacteroidales	Unclass_Bacteroidales	s__Bacteroidales_bacterium_55_9
sk__Bacteria	k__Bacteria	p__Bacteroidetes	c__Bacteroidia	o__Bacteroidales	f__Prevotellaceae	g__Prevotella	s__Prevotella_sp._HJM029
sk__Bacteria	k__Bacteria	p__Bacteroidetes	c__Bacteroidia	o__Bacteroidales	f__Rikenellaceae	g__Anaerocella	Unclass_Anaerocella
sk__Bacteria	k__Bacteria	p__Bacteroidetes	c__Cytophagia	o__Cytophagales	f__Flammeovirgaceae	Unclass_Flammeovirgaceae	Unclass_Flammeovirgaceae
sk__Bacteria	k__Bacteria	p__Bacteroidetes	c__Cytophagia	o__Cytophagales	f__Hymenobacteraceae	Unclass_Hymenobacteraceae	Unclass_Hymenobacteraceae
sk__Bacteria	k__Bacteria	p__Bacteroidetes	c__Flavobacteriia	o__Flavobacteriales	f__Flavobacteriaceae	g__Myroides	Unclass_Myroides
sk__Bacteria	k__Bacteria	p__Bacteroidetes	c__Flavobacteriia	o__Flavobacteriales	f__Ichthyobacteriaceae	Unclass_Ichthyobacteriaceae	Unclass_Ichthyobacteriaceae
sk__Bacteria	k__Bacteria	p__Balneolaeota	c__Balneolia	o__Balneolales	Unclass_Balneolales	Unclass_Balneolales	Unclass_Balneolales
sk__Bacteria	k__Bacteria	p__Candidatus_Jorgensenbacteria	Unclass_Candidatus_Jorgensenbacteria	Unclass_Candidatus_Jorgensenbacteria	Unclass_Candidatus_Jorgensenbacteria	Unclass_Candidatus_Jorgensenbacteria	Unclass_Candidatus_Jorgensenbacteria
sk__Bacteria	k__Bacteria	p__Candidatus_Raymondbacteria	Unclass_Candidatus_Raymondbacteria	Unclass_Candidatus_Raymondbacteria	Unclass_Candidatus_Raymondbacteria	Unclass_Candidatus_Raymondbacteria	Unclass_Candidatus_Raymondbacteria
sk__Bacteria	k__Bacteria	p__Candidatus_Schekmanbacteria	Unclass_Candidatus_Schekmanbacteria	Unclass_Candidatus_Schekmanbacteria	Unclass_Candidatus_Schekmanbacteria	Unclass_Candidatus_Schekmanbacteria	Unclass_Candidatus_Schekmanbacteria
sk__Bacteria	k__Bacteria	p__Chloroflexi	c__Ktedonobacteria	o__Ktedonobacterales	Unclass_Ktedonobacterales	Unclass_Ktedonobacterales	Unclass_Ktedonobacterales
sk__Bacteria	k__Bacteria	p__Elusimicrobia	c__Elusimicrobia	o__Elusimicrobiales	f__Elusimicrobiaceae	g__Elusimicrobium	s__Elusimicrobium_minutum
sk__Bacteria	k__Bacteria	p__Fibrobacteres	Unclass_Fibrobacteres	Unclass_Fibrobacteres	Unclass_Fibrobacteres	Unclass_Fibrobacteres	Unclass_Fibrobacteres
sk__Bacteria	k__Bacteria	p__Firmicutes	c__Bacilli	o__Bacillales	f__Staphylococcaceae	g__Jeotgalicoccus	Unclass_Jeotgalicoccus
sk__Bacteria	k__Bacteria	p__Firmicutes	c__Clostridia	o__Clostridiales	Unclass_Clostridiales	Unclass_Clostridiales	s__Clostridiales_bacterium_DJF_B152
sk__Bacteria	k__Bacteria	p__Firmicutes	c__Clostridia	o__Clostridiales	Unclass_Clostridiales	Unclass_Clostridiales	s__[Bacteroides]_pectinophilus
sk__Bacteria	k__Bacteria	p__Firmicutes	c__Clostridia	o__Clostridiales	Unclass_Clostridiales	g__Pseudoflavonifractor	Unclass_Pseudoflavonifractor
sk__Bacteria	k__Bacteria	p__Firmicutes	c__Clostridia	o__Clostridiales	f__Clostridiaceae	g__Clostridium	s__Clostridium_sp._CAG:288
sk__Bacteria	k__Bacteria	p__Firmicutes	c__Clostridia	o__Clostridiales	f__Clostridiaceae	g__Thermobrachium	Unclass_Thermobrachium
sk__Bacteria	k__Bacteria	p__Firmicutes	c__Clostridia	o__Clostridiales	f__Eubacteriaceae	g__Eubacterium	s__Eubacterium_pyruvativorans
sk__Bacteria	k__Bacteria	p__Firmicutes	c__Clostridia	o__Clostridiales	f__Lachnospiraceae	g__Mobilitalea	Unclass_Mobilitalea
sk__Bacteria	k__Bacteria	p__Firmicutes	c__Clostridia	o__Clostridiales	f__Oscillospiraceae	g__Marseillibacter	s__Marseillibacter_massiliensis
sk__Bacteria	k__Bacteria	p__Firmicutes	c__Clostridia	o__Clostridiales	f__Peptostreptococcaceae	g__Paeniclostridium	Unclass_Paeniclostridium
sk__Bacteria	k__Bacteria	p__Firmicutes	c__Clostridia	o__Clostridiales	f__Proteinivoraceae	Unclass_Proteinivoraceae	Unclass_Proteinivoraceae
sk__Bacteria	k__Bacteria	p__Firmicutes	c__Clostridia	o__Clostridiales	f__Ruminococcaceae	g__Anaerobacterium	Unclass_Anaerobacterium
sk__Bacteria	k__Bacteria	p__Firmicutes	c__Clostridia	o__Clostridiales	f__Ruminococcaceae	g__Ruminococcus	s__Ruminococcus_bromii
sk__Bacteria	k__Bacteria	p__Firmicutes	c__Clostridia	o__Clostridiales	f__Ruminococcaceae	g__Ruminococcus	s__Ruminococcus_sp._YE281
sk__Bacteria	k__Bacteria	p__Firmicutes	c__Erysipelotrichia	o__Erysipelotrichales	f__Erysipelotrichaceae	g__Holdemania	Unclass_Holdemania
sk__Bacteria	k__Bacteria	p__Lentisphaerae	c__Lentisphaeria	o__Victivallales	f__Victivallaceae	Unclass_Victivallaceae	Unclass_Victivallaceae
sk__Bacteria	k__Bacteria	p__Proteobacteria	c__Alphaproteobacteria	o__Rhizobiales	f__Hyphomicrobiaceae	g__Pedomicrobium	Unclass_Pedomicrobium
sk__Bacteria	k__Bacteria	p__Proteobacteria	c__Alphaproteobacteria	o__Rhizobiales	f__Rhodobiaceae	Unclass_Rhodobiaceae	Unclass_Rhodobiaceae
sk__Bacteria	k__Bacteria	p__Proteobacteria	c__Alphaproteobacteria	o__Rhizobiales	f__Xanthobacteraceae	Unclass_Xanthobacteraceae	Unclass_Xanthobacteraceae
sk__Bacteria	k__Bacteria	p__Proteobacteria	c__Alphaproteobacteria	o__Rhodobacterales	f__Rhodobacteraceae	g__Rubellimicrobium	Unclass_Rubellimicrobium
sk__Bacteria	k__Bacteria	p__Proteobacteria	c__Betaproteobacteria	o__Burkholderiales	Unclass_Burkholderiales	g__Rivibacter	Unclass_Rivibacter
sk__Bacteria	k__Bacteria	p__Proteobacteria	c__Betaproteobacteria	o__Burkholderiales	f__Alcaligenaceae	g__Alcaligenes	Unclass_Alcaligenes
sk__Bacteria	k__Bacteria	p__Proteobacteria	c__Betaproteobacteria	o__Burkholderiales	f__Comamonadaceae	g__Comamonas	s__Comamonas_aquatica
sk__Bacteria	k__Bacteria	p__Proteobacteria	c__Betaproteobacteria	o__Burkholderiales	f__Comamonadaceae	g__Comamonas	s__Comamonas_testosteroni
sk__Bacteria	k__Bacteria	p__Proteobacteria	c__Betaproteobacteria	o__Burkholderiales	f__Sutterellaceae	g__Duodenibacillus	s__Duodenibacillus_massiliensis
sk__Bacteria	k__Bacteria	p__Proteobacteria	c__Epsilonproteobacteria	o__Campylobacterales	f__Campylobacteraceae	g__Campylobacter	s__Campylobacter_avium
sk__Bacteria	k__Bacteria	p__Proteobacteria	c__Epsilonproteobacteria	o__Campylobacterales	f__Campylobacteraceae	g__Campylobacter	s__Campylobacter_sp._MIT_99-7217
sk__Bacteria	k__Bacteria	p__Proteobacteria	c__Epsilonproteobacteria	o__Campylobacterales	f__Helicobacteraceae	g__Sulfurimonas	Unclass_Sulfurimonas
sk__Bacteria	k__Bacteria	p__Proteobacteria	c__Gammaproteobacteria	Unclass_Gammaproteobacteria	Unclass_Gammaproteobacteria	g__Pseudohongiella	Unclass_Pseudohongiella
sk__Bacteria	k__Bacteria	p__Proteobacteria	c__Gammaproteobacteria	o__Aeromonadales	f__Aeromonadaceae	g__Zobellella	Unclass_Zobellella
sk__Bacteria	k__Bacteria	p__Proteobacteria	c__Gammaproteobacteria	o__Chromatiales	f__Chromatiaceae	g__Thiorhodovibrio	Unclass_Thiorhodovibrio
sk__Bacteria	k__Bacteria	p__Proteobacteria	c__Gammaproteobacteria	o__Enterobacterales	f__Morganellaceae	g__Providencia	Unclass_Providencia
sk__Bacteria	k__Bacteria	p__Proteobacteria	c__Gammaproteobacteria	o__Oceanospirillales	f__Oceanospirillaceae	g__Neptunomonas	Unclass_Neptunomonas
sk__Bacteria	k__Bacteria	p__Proteobacteria	c__Gammaproteobacteria	o__Pseudomonadales	f__Moraxellaceae	g__Acinetobacter	s__Acinetobacter_calcoaceticus
sk__Bacteria	k__Bacteria	p__Proteobacteria	c__Gammaproteobacteria	o__Pseudomonadales	f__Pseudomonadaceae	g__Azotobacter	Unclass_Azotobacter
sk__Bacteria	k__Bacteria	p__Proteobacteria	c__Gammaproteobacteria	o__Pseudomonadales	f__Pseudomonadaceae	g__Thiopseudomonas	Unclass_Thiopseudomonas
sk__Bacteria	k__Bacteria	p__Proteobacteria	c__Gammaproteobacteria	o__Salinisphaerales	Unclass_Salinisphaerales	Unclass_Salinisphaerales	Unclass_Salinisphaerales
sk__Bacteria	k__Bacteria	p__Proteobacteria	c__Gammaproteobacteria	o__Thiotrichales	f__Thiotrichaceae	g__Beggiatoa	Unclass_Beggiatoa
sk__Bacteria	k__Bacteria	p__Proteobacteria	c__Gammaproteobacteria	o__Xanthomonadales	f__Xanthomonadaceae	g__Arenimonas	Unclass_Arenimonas
sk__Bacteria	k__Bacteria	p__Proteobacteria	c__Hydrogenophilalia	o__Hydrogenophilales	Unclass_Hydrogenophilales	Unclass_Hydrogenophilales	Unclass_Hydrogenophilales
sk__Bacteria	k__Bacteria	p__Tenericutes	c__Mollicutes	o__Anaeroplasmatales	f__Anaeroplasmataceae	g__Anaeroplasma	Unclass_Anaeroplasma
sk__Archaea	k__Archaea	p__Euryarchaeota	c__Methanobacteria	o__Methanobacteriales	f__Methanobacteriaceae	g__Methanobacterium	Unclass_Methanobacterium
sk__Bacteria	k__Bacteria	Unclass_Bacteria	Unclass_Bacteria	Unclass_Bacteria	Unclass_Bacteria	Unclass_Bacteria	s__bacterium_enrichment_culture_clone_B17(2011)
sk__Bacteria	k__Bacteria	Unclass_Bacteria	Unclass_Bacteria	Unclass_Bacteria	Unclass_Bacteria	Unclass_Bacteria	s__bacterium_symbiont_of_Bactrocera_correcta
sk__Bacteria	k__Bacteria	p__Actinobacteria	c__Actinobacteria	o__Bifidobacteriales	f__Bifidobacteriaceae	g__Bifidobacterium	s__Bifidobacterium_sp._MRM_8.19
sk__Bacteria	k__Bacteria	p__Bacteroidetes	c__Bacteroidia	o__Bacteroidales	f__Prevotellaceae	g__Prevotella	s__Prevotella_intermedia
sk__Bacteria	k__Bacteria	p__Bacteroidetes	c__Bacteroidia	o__Bacteroidales	f__Prevotellaceae	g__Prevotella	s__Prevotella_sp._HUN102
sk__Bacteria	k__Bacteria	p__Bacteroidetes	c__Bacteroidia	o__Bacteroidales	f__Prevotellaceae	g__Prevotella	s__Prevotella_sp._oral_clone_FW035
sk__Bacteria	k__Bacteria	p__Bacteroidetes	c__Bacteroidia	o__Marinilabiliales	f__Marinilabiliaceae	Unclass_Marinilabiliaceae	Unclass_Marinilabiliaceae
sk__Bacteria	k__Bacteria	p__Bacteroidetes	c__Flavobacteriia	o__Flavobacteriales	f__Flavobacteriaceae	g__Capnocytophaga	s__Capnocytophaga_sp._oral_clone_ID062
sk__Bacteria	k__Bacteria	p__Bacteroidetes	c__Flavobacteriia	o__Flavobacteriales	f__Flavobacteriaceae	g__Flavobacterium	s__Flavobacterium_caeni
sk__Bacteria	k__Bacteria	p__Candidatus_Doudnabacteria	Unclass_Candidatus_Doudnabacteria	Unclass_Candidatus_Doudnabacteria	Unclass_Candidatus_Doudnabacteria	Unclass_Candidatus_Doudnabacteria	Unclass_Candidatus_Doudnabacteria
sk__Bacteria	k__Bacteria	p__Candidatus_Gracilibacteria	Unclass_Candidatus_Gracilibacteria	Unclass_Candidatus_Gracilibacteria	Unclass_Candidatus_Gracilibacteria	Unclass_Candidatus_Gracilibacteria	Unclass_Candidatus_Gracilibacteria
sk__Bacteria	k__Bacteria	p__Candidatus_Portnoybacteria	Unclass_Candidatus_Portnoybacteria	Unclass_Candidatus_Portnoybacteria	Unclass_Candidatus_Portnoybacteria	Unclass_Candidatus_Portnoybacteria	Unclass_Candidatus_Portnoybacteria
sk__Bacteria	k__Bacteria	p__Chlamydiae	c__Chlamydiia	o__Chlamydiales	f__Chlamydiaceae	g__Chlamydia	Unclass_Chlamydia
sk__Bacteria	k__Bacteria	p__Chloroflexi	c__Chloroflexia	o__Chloroflexales	Unclass_Chloroflexales	Unclass_Chloroflexales	Unclass_Chloroflexales
sk__Bacteria	k__Bacteria	p__Firmicutes	c__Clostridia	o__Clostridiales	Unclass_Clostridiales	g__Howardella	s__Howardella_ureilytica
sk__Bacteria	k__Bacteria	p__Firmicutes	c__Clostridia	o__Clostridiales	f__Ruminococcaceae	g__Ruminococcus	s__Ruminococcus_sp._ID1
sk__Bacteria	k__Bacteria	p__Firmicutes	c__Negativicutes	o__Selenomonadales	f__Selenomonadaceae	g__Pectinatus	Unclass_Pectinatus
sk__Bacteria	k__Bacteria	p__Fusobacteria	c__Fusobacteriia	o__Fusobacteriales	f__Fusobacteriaceae	g__Fusobacterium	s__Fusobacterium_russii
sk__Bacteria	k__Bacteria	p__Proteobacteria	c__Betaproteobacteria	o__Ferrovales	Unclass_Ferrovales	Unclass_Ferrovales	Unclass_Ferrovales
sk__Bacteria	k__Bacteria	p__Proteobacteria	c__Betaproteobacteria	o__Neisseriales	f__Neisseriaceae	g__Neisseria	s__Neisseria_lactamica
sk__Bacteria	k__Bacteria	p__Proteobacteria	c__Gammaproteobacteria	o__Enterobacterales	f__Enterobacteriaceae	g__Candidatus_Gullanella	Unclass_Candidatus_Gullanella
sk__Bacteria	k__Bacteria	p__Proteobacteria	c__Gammaproteobacteria	o__Enterobacterales	f__Erwiniaceae	g__Buchnera	Unclass_Buchnera
sk__Bacteria	k__Bacteria	p__Proteobacteria	c__Gammaproteobacteria	o__Oceanospirillales	f__Hahellaceae	Unclass_Hahellaceae	Unclass_Hahellaceae
sk__Bacteria	k__Bacteria	p__Proteobacteria	c__Gammaproteobacteria	o__Orbales	f__Orbaceae	g__Orbus	Unclass_Orbus
sk__Bacteria	k__Bacteria	p__Proteobacteria	c__Gammaproteobacteria	o__Thiotrichales	f__Thiotrichaceae	g__Achromatium	Unclass_Achromatium
sk__Chloroplast	k__Chloroplast	Unclass_Chloroplast	Unclass_Chloroplast	Unclass_Chloroplast	Unclass_Chloroplast	Unclass_Chloroplast	s__Eimeria_praecox
sk__Eukaryota	k__Eukaryota	Unclass_Eukaryota	c__Chrysophyceae	o__Chromulinales	f__Chromulinaceae	g__Ochromonas	s__Ochromonas_sphaerocystis
sk__Eukaryota	k__Eukaryota	Unclass_Eukaryota	c__Chrysophyceae	o__Chromulinales	f__Chrysoamoebidaceae	g__Chrysamoeba	s__Chrysamoeba_mikrokonta
sk__Eukaryota	k__Eukaryota	Unclass_Eukaryota	c__Oligohymenophorea	o__Philasterida	f__Loxocephalidae	g__Dexiotricha	Unclass_Dexiotricha
sk__Eukaryota	k__Eukaryota	Unclass_Eukaryota	c__Spirotrichea	o__Sporadotrichida	f__Oxytrichidae	g__Stylonychia	Unclass_Stylonychia
sk__Eukaryota	k__Fungi	p__Cryptomycota	Unclass_Cryptomycota	Unclass_Cryptomycota	Unclass_Cryptomycota	Unclass_Cryptomycota	Unclass_Cryptomycota
sk__Archaea	k__Archaea	p__Crenarchaeota	Unclass_Crenarchaeota	Unclass_Crenarchaeota	Unclass_Crenarchaeota	Unclass_Crenarchaeota	Unclass_Crenarchaeota
sk__Bacteria	k__Bacteria	Unclass_Bacteria	Unclass_Bacteria	Unclass_Bacteria	Unclass_Bacteria	Unclass_Bacteria	s__bacterium_ic1277
sk__Bacteria	k__Bacteria	Unclass_Bacteria	Unclass_Bacteria	Unclass_Bacteria	Unclass_Bacteria	Unclass_Bacteria	s__saltmarsh_clone_LCP-6
sk__Bacteria	k__Bacteria	p__Actinobacteria	c__Nitriliruptoria	o__Nitriliruptorales	Unclass_Nitriliruptorales	Unclass_Nitriliruptorales	Unclass_Nitriliruptorales
sk__Bacteria	k__Bacteria	p__Armatimonadetes	c__Fimbriimonadia	o__Fimbriimonadales	Unclass_Fimbriimonadales	Unclass_Fimbriimonadales	Unclass_Fimbriimonadales
sk__Bacteria	k__Bacteria	p__Bacteroidetes	c__Bacteroidia	o__Bacteroidales	f__Bacteroidaceae	g__Bacteroides	s__Bacteroides_sp._CAG:1060_57_27
sk__Bacteria	k__Bacteria	p__Bacteroidetes	c__Bacteroidia	o__Bacteroidales	f__Porphyromonadaceae	g__Fermentimonas	Unclass_Fermentimonas
sk__Bacteria	k__Bacteria	p__Bacteroidetes	c__Bacteroidia	o__Marinilabiliales	f__Salinivirgaceae	Unclass_Salinivirgaceae	Unclass_Salinivirgaceae
sk__Bacteria	k__Bacteria	p__Bacteroidetes	c__Cytophagia	o__Cytophagales	f__Hymenobacteraceae	g__Nibribacter	Unclass_Nibribacter
sk__Bacteria	k__Bacteria	p__Bacteroidetes	c__Flavobacteriia	o__Flavobacteriales	f__Blattabacteriaceae	Unclass_Blattabacteriaceae	Unclass_Blattabacteriaceae
sk__Bacteria	k__Bacteria	p__Elusimicrobia	c__Endomicrobia	o__Endomicrobiales	Unclass_Endomicrobiales	Unclass_Endomicrobiales	Unclass_Endomicrobiales
sk__Bacteria	k__Bacteria	p__Firmicutes	c__Bacilli	o__Bacillales	f__Listeriaceae	Unclass_Listeriaceae	Unclass_Listeriaceae
sk__Bacteria	k__Bacteria	p__Firmicutes	c__Clostridia	Unclass_Clostridia	Unclass_Clostridia	Unclass_Clostridia	s__Clostridia_bacterium_enrichment_culture_clone_WSC-26
sk__Bacteria	k__Bacteria	p__Firmicutes	c__Clostridia	o__Clostridiales	Unclass_Clostridiales	Unclass_Clostridiales	s__Clostridiales_bacterium_CIEAF_016
sk__Bacteria	k__Bacteria	p__Firmicutes	c__Clostridia	o__Clostridiales	Unclass_Clostridiales	g__Natranaerovirga	Unclass_Natranaerovirga
sk__Bacteria	k__Bacteria	p__Firmicutes	c__Clostridia	o__Clostridiales	f__Clostridiaceae	g__Clostridium	s__Clostridium_sp._Culture_Jar-56
sk__Bacteria	k__Bacteria	p__Firmicutes	c__Clostridia	o__Clostridiales	f__Lachnospiraceae	g__Parasporobacterium	s__Parasporobacterium_paucivorans
sk__Bacteria	k__Bacteria	p__Firmicutes	c__Clostridia	o__Clostridiales	f__Ruminococcaceae	g__Acetanaerobacterium	Unclass_Acetanaerobacterium
sk__Bacteria	k__Bacteria	p__Firmicutes	c__Clostridia	o__Clostridiales	f__Ruminococcaceae	g__Angelakisella	s__Angelakisella_massiliensis
sk__Bacteria	k__Bacteria	p__Firmicutes	c__Clostridia	o__Clostridiales	f__Ruminococcaceae	g__Ercella	Unclass_Ercella
sk__Bacteria	k__Bacteria	p__Firmicutes	c__Clostridia	o__Clostridiales	f__Ruminococcaceae	g__Pygmaiobacter	Unclass_Pygmaiobacter
sk__Bacteria	k__Bacteria	p__Firmicutes	c__Clostridia	o__Clostridiales	f__Ruminococcaceae	g__Ruminococcus	s__Ruminococcus_gauvreauii
sk__Bacteria	k__Bacteria	p__Firmicutes	c__Limnochordia	Unclass_Limnochordia	Unclass_Limnochordia	Unclass_Limnochordia	Unclass_Limnochordia
sk__Bacteria	k__Bacteria	p__Lentisphaerae	c__Oligosphaeria	o__Oligosphaerales	Unclass_Oligosphaerales	Unclass_Oligosphaerales	Unclass_Oligosphaerales
sk__Bacteria	k__Bacteria	p__Nitrospirae	c__Nitrospira	o__Nitrospirales	f__Nitrospiraceae	g__Thermodesulfovibrio	Unclass_Thermodesulfovibrio
sk__Bacteria	k__Bacteria	p__Proteobacteria	c__Alphaproteobacteria	o__Caulobacterales	f__Caulobacteraceae	g__Caulobacter	Unclass_Caulobacter
sk__Bacteria	k__Bacteria	p__Proteobacteria	c__Betaproteobacteria	o__Neisseriales	f__Neisseriaceae	g__Vitreoscilla	s__Vitreoscilla_stercoraria
sk__Bacteria	k__Bacteria	p__Proteobacteria	c__Gammaproteobacteria	o__Enterobacterales	f__Enterobacteriaceae	g__Candidatus_Hamiltonella	Unclass_Candidatus_Hamiltonella
sk__Bacteria	k__Bacteria	p__Proteobacteria	c__Gammaproteobacteria	o__Nevskiales	Unclass_Nevskiales	Unclass_Nevskiales	Unclass_Nevskiales
sk__Bacteria	k__Bacteria	p__Spirochaetes	c__Spirochaetia	o__Spirochaetales	f__Spirochaetaceae	g__Treponema	s__Treponema_berlinense
sk__Bacteria	k__Bacteria	p__Synergistetes	c__Synergistia	o__Synergistales	f__Synergistaceae	g__Pyramidobacter	Unclass_Pyramidobacter
sk__Bacteria	k__Bacteria	p__Verrucomicrobia	c__Spartobacteria	o__Chthoniobacterales	f__Chthoniobacteraceae	Unclass_Chthoniobacteraceae	Unclass_Chthoniobacteraceae
sk__Bacteria	k__Bacteria	p__Verrucomicrobia	c__Verrucomicrobiae	o__Verrucomicrobiales	f__Akkermansiaceae	g__Akkermansia	s__Akkermansia_glycaniphila
sk__Eukaryota	k__Eukaryota	Unclass_Eukaryota	Unclass_Eukaryota	Unclass_Eukaryota	Unclass_Eukaryota	g__Blastocystis	Unclass_Blastocystis
sk__Bacteria	k__Bacteria	p__Actinobacteria	c__Actinobacteria	o__Corynebacteriales	f__Corynebacteriaceae	g__Corynebacterium	s__Corynebacterium_sp._M_72
sk__Bacteria	k__Bacteria	p__Actinobacteria	c__Actinobacteria	o__Micrococcales	f__Dermacoccaceae	g__Luteipulveratus	Unclass_Luteipulveratus
sk__Bacteria	k__Bacteria	p__Actinobacteria	c__Actinobacteria	o__Propionibacteriales	f__Propionibacteriaceae	g__Aestuariimicrobium	s__Aestuariimicrobium_kwangyangense
sk__Bacteria	k__Bacteria	p__Actinobacteria	c__Rubrobacteria	o__Gaiellales	f__Gaiellaceae	Unclass_Gaiellaceae	Unclass_Gaiellaceae
sk__Bacteria	k__Bacteria	p__Bacteroidetes	c__Bacteroidia	o__Bacteroidales	f__Bacteroidaceae	g__Bacteroides	s__Bacteroides_vulgatus
sk__Bacteria	k__Bacteria	p__Bacteroidetes	c__Cytophagia	o__Cytophagales	f__Cytophagaceae	g__Spirosoma	Unclass_Spirosoma
sk__Bacteria	k__Bacteria	p__Candidatus_Yanofskybacteria	Unclass_Candidatus_Yanofskybacteria	Unclass_Candidatus_Yanofskybacteria	Unclass_Candidatus_Yanofskybacteria	Unclass_Candidatus_Yanofskybacteria	Unclass_Candidatus_Yanofskybacteria
sk__Bacteria	k__Bacteria	p__Chloroflexi	c__Thermomicrobia	o__Sphaerobacterales	Unclass_Sphaerobacterales	Unclass_Sphaerobacterales	Unclass_Sphaerobacterales
sk__Bacteria	k__Bacteria	p__Firmicutes	c__Bacilli	o__Bacillales	Unclass_Bacillales	g__Acidibacillus	Unclass_Acidibacillus
sk__Bacteria	k__Bacteria	p__Firmicutes	c__Bacilli	o__Bacillales	f__Bacillaceae	g__Sinibacillus	Unclass_Sinibacillus
sk__Bacteria	k__Bacteria	p__Firmicutes	c__Bacilli	o__Bacillales	f__Planococcaceae	g__Solibacillus	Unclass_Solibacillus
sk__Bacteria	k__Bacteria	p__Firmicutes	c__Bacilli	o__Lactobacillales	f__Carnobacteriaceae	g__Carnobacterium	Unclass_Carnobacterium
sk__Bacteria	k__Bacteria	p__Firmicutes	c__Bacilli	o__Lactobacillales	f__Enterococcaceae	g__Enterococcus	s__Enterococcus_casseliflavus
sk__Bacteria	k__Bacteria	p__Firmicutes	c__Bacilli	o__Lactobacillales	f__Enterococcaceae	g__Enterococcus	s__Enterococcus_durans
sk__Bacteria	k__Bacteria	p__Firmicutes	c__Bacilli	o__Lactobacillales	f__Enterococcaceae	g__Enterococcus	s__Enterococcus_hermanniensis
sk__Bacteria	k__Bacteria	p__Firmicutes	c__Bacilli	o__Lactobacillales	f__Lactobacillaceae	Unclass_Lactobacillaceae	s__bacterium_#1_from_Psoroptes_ovis
sk__Bacteria	k__Bacteria	p__Firmicutes	c__Bacilli	o__Lactobacillales	f__Streptococcaceae	g__Streptococcus	s__Streptococcus_equi
sk__Bacteria	k__Bacteria	p__Firmicutes	c__Clostridia	o__Clostridiales	f__Lachnospiraceae	g__Acetitomaculum	s__Acetitomaculum_ruminis
sk__Bacteria	k__Bacteria	p__Firmicutes	c__Clostridia	o__Clostridiales	f__Lachnospiraceae	g__Blautia	s__Blautia_hydrogenotrophica
sk__Bacteria	k__Bacteria	p__Proteobacteria	c__Alphaproteobacteria	o__Rhizobiales	f__Cohaesibacteraceae	Unclass_Cohaesibacteraceae	Unclass_Cohaesibacteraceae
sk__Bacteria	k__Bacteria	p__Proteobacteria	c__Alphaproteobacteria	o__Rhodospirillales	f__Rhodospirillaceae	g__Constrictibacter	Unclass_Constrictibacter
sk__Bacteria	k__Bacteria	p__Proteobacteria	c__Betaproteobacteria	o__Burkholderiales	f__Sutterellaceae	g__Parasutterella	s__Parasutterella_excrementihominis
sk__Bacteria	k__Bacteria	p__Proteobacteria	c__Gammaproteobacteria	o__Enterobacterales	f__Enterobacteriaceae	g__Citrobacter	s__Citrobacter_amalonaticus
sk__Bacteria	k__Bacteria	p__Proteobacteria	c__Gammaproteobacteria	o__Enterobacterales	f__Enterobacteriaceae	g__Enterobacter	s__Enterobacter_cloacae
sk__Bacteria	k__Bacteria	p__Proteobacteria	c__Gammaproteobacteria	o__Enterobacterales	f__Pectobacteriaceae	g__Brenneria	s__Brenneria_populi_Li_et_al._2015
sk__Bacteria	k__Bacteria	p__Proteobacteria	c__Gammaproteobacteria	o__Oceanospirillales	f__Endozoicomonaceae	g__Endozoicomonas	Unclass_Endozoicomonas
sk__Bacteria	k__Bacteria	p__Proteobacteria	c__Gammaproteobacteria	o__Oceanospirillales	f__Endozoicomonaceae	g__Kistimonas	Unclass_Kistimonas
sk__Bacteria	k__Bacteria	p__Proteobacteria	c__Gammaproteobacteria	o__Oceanospirillales	f__Oleiphilaceae	g__Oleiphilus	Unclass_Oleiphilus
sk__Bacteria	k__Bacteria	p__Synergistetes	c__Synergistia	o__Synergistales	f__Synergistaceae	g__Synergistes	Unclass_Synergistes
sk__Bacteria	k__Bacteria	p__Tenericutes	c__Mollicutes	o__Entomoplasmatales	Unclass_Entomoplasmatales	Unclass_Entomoplasmatales	Unclass_Entomoplasmatales
sk__Bacteria	k__Bacteria	p__Tenericutes	c__Mollicutes	o__Mycoplasmatales	f__Mycoplasmataceae	g__Mycoplasma	s__Mycoplasma_muris
sk__Bacteria	k__Bacteria	p__Actinobacteria	c__Actinobacteria	o__Corynebacteriales	f__Corynebacteriaceae	g__Corynebacterium	s__Corynebacterium_doosanense
sk__Bacteria	k__Bacteria	p__Actinobacteria	c__Actinobacteria	o__Micrococcales	f__Intrasporangiaceae	g__Ornithinimicrobium	Unclass_Ornithinimicrobium
sk__Bacteria	k__Bacteria	p__Actinobacteria	c__Actinobacteria	o__Pseudonocardiales	f__Pseudonocardiaceae	g__Pseudonocardia	Unclass_Pseudonocardia
sk__Bacteria	k__Bacteria	p__Actinobacteria	c__Coriobacteriia	o__Eggerthellales	f__Eggerthellaceae	g__Phoenicibacter	Unclass_Phoenicibacter
sk__Bacteria	k__Bacteria	p__Bacteroidetes	c__Chitinophagia	o__Chitinophagales	f__Chitinophagaceae	g__Sediminibacterium	Unclass_Sediminibacterium
sk__Bacteria	k__Bacteria	p__Bacteroidetes	c__Cytophagia	o__Cytophagales	f__Cytophagaceae	g__Cytophaga	Unclass_Cytophaga
sk__Bacteria	k__Bacteria	p__Candidatus_Parcubacteria	Unclass_Candidatus_Parcubacteria	Unclass_Candidatus_Parcubacteria	Unclass_Candidatus_Parcubacteria	Unclass_Candidatus_Parcubacteria	Unclass_Candidatus_Parcubacteria
sk__Bacteria	k__Bacteria	p__Candidatus_Saccharibacteria	Unclass_Candidatus_Saccharibacteria	Unclass_Candidatus_Saccharibacteria	Unclass_Candidatus_Saccharibacteria	Unclass_Candidatus_Saccharibacteria	s__Candidatus_Saccharibacteria_bacterium_GW2011_GWC2_44_17
sk__Bacteria	k__Bacteria	p__Proteobacteria	c__Alphaproteobacteria	o__Rhizobiales	Unclass_Rhizobiales	g__Alsobacter	Unclass_Alsobacter
sk__Bacteria	k__Bacteria	p__Proteobacteria	c__Alphaproteobacteria	o__Rhodobacterales	f__Rhodobacteraceae	g__Rhodobacter	Unclass_Rhodobacter
sk__Bacteria	k__Bacteria	p__Proteobacteria	c__Alphaproteobacteria	o__Rhodospirillales	f__Rhodospirillaceae	g__Magnetospira	Unclass_Magnetospira
sk__Bacteria	k__Bacteria	p__Proteobacteria	c__Gammaproteobacteria	Unclass_Gammaproteobacteria	Unclass_Gammaproteobacteria	Unclass_Gammaproteobacteria	s__gamma_proteobacterium_symbiont_of_Erthesina_fullo
sk__Bacteria	k__Bacteria	p__Proteobacteria	c__Gammaproteobacteria	Unclass_Gammaproteobacteria	Unclass_Gammaproteobacteria	Unclass_Gammaproteobacteria	s__gamma_proteobacterium_symbiont_of_Hermolaus_amurensis
sk__Bacteria	k__Bacteria	p__Proteobacteria	c__Gammaproteobacteria	o__Alteromonadales	f__Alteromonadaceae	g__Paraglaciecola	Unclass_Paraglaciecola
sk__Bacteria	k__Bacteria	p__Proteobacteria	c__Gammaproteobacteria	o__Enterobacterales	f__Enterobacteriaceae	g__Candidatus_Purcelliella	s__Candidatus_Purcelliella_pentastirinorum
sk__Bacteria	k__Bacteria	p__Proteobacteria	c__Gammaproteobacteria	o__Enterobacterales	f__Enterobacteriaceae	g__Enterobacter	s__Enterobacter_hormaechei
sk__Bacteria	k__Bacteria	p__Proteobacteria	c__Gammaproteobacteria	o__Enterobacterales	f__Enterobacteriaceae	g__Kosakonia	Unclass_Kosakonia
sk__Bacteria	k__Bacteria	p__Proteobacteria	c__Gammaproteobacteria	o__Methylococcales	Unclass_Methylococcales	Unclass_Methylococcales	Unclass_Methylococcales
sk__Bacteria	k__Bacteria	p__Proteobacteria	c__Gammaproteobacteria	o__Orbales	f__Orbaceae	g__Candidatus_Schmidhempelia	Unclass_Candidatus_Schmidhempelia
sk__Bacteria	k__Bacteria	p__Proteobacteria	c__Gammaproteobacteria	o__Pasteurellales	f__Pasteurellaceae	g__Haemophilus	s__Haemophilus_influenzae
sk__Bacteria	k__Bacteria	p__Proteobacteria	c__Gammaproteobacteria	o__Pseudomonadales	f__Pseudomonadaceae	g__Pseudomonas	s__Pseudomonas_putida
sk__Eukaryota	k__Eukaryota	Unclass_Eukaryota	Unclass_Eukaryota	o__Cercomonadida	f__Cercomonadidae	g__Cercomonas	s__Cercomonas_sp._Tempisque
sk__Eukaryota	k__Eukaryota	Unclass_Eukaryota	c__Heterotrichea	o__Heterotrichida	Unclass_Heterotrichida	Unclass_Heterotrichida	Unclass_Heterotrichida
sk__Eukaryota	k__Fungi	p__Ascomycota	c__Eurotiomycetes	o__Chaetothyriales	f__Herpotrichiellaceae	Unclass_Herpotrichiellaceae	Unclass_Herpotrichiellaceae
sk__Bacteria	k__Bacteria	Unclass_Bacteria	Unclass_Bacteria	Unclass_Bacteria	Unclass_Bacteria	Unclass_Bacteria	s__bacterium_LB2020
sk__Bacteria	k__Bacteria	Unclass_Bacteria	Unclass_Bacteria	Unclass_Bacteria	Unclass_Bacteria	Unclass_Bacteria	s__iron-reducing_bacterium_enrichment_culture_clone_HN10
sk__Bacteria	k__Bacteria	p__Acidobacteria	c__Holophagae	o__Acanthopleuribacterales	f__Acanthopleuribacteraceae	Unclass_Acanthopleuribacteraceae	Unclass_Acanthopleuribacteraceae
sk__Bacteria	k__Bacteria	p__Actinobacteria	c__Thermoleophilia	o__Solirubrobacterales	f__Parviterribacteraceae	g__Parviterribacter	Unclass_Parviterribacter
sk__Bacteria	k__Bacteria	p__Bacteroidetes	c__Bacteroidia	o__Bacteroidales	f__Bacteroidaceae	g__Bacteroides	s__Bacteroides_acidifaciens
sk__Bacteria	k__Bacteria	p__Bacteroidetes	c__Bacteroidia	o__Bacteroidales	f__Bacteroidaceae	g__Bacteroides	s__Bacteroides_paurosaccharolyticus
sk__Bacteria	k__Bacteria	p__Bacteroidetes	c__Bacteroidia	o__Bacteroidales	f__Porphyromonadaceae	g__Sanguibacteroides	Unclass_Sanguibacteroides
sk__Bacteria	k__Bacteria	p__Bacteroidetes	c__Bacteroidia	o__Bacteroidales	f__Prevotellaceae	g__Prevotella	s__Prevotella_sp._310-5
sk__Bacteria	k__Bacteria	p__Bacteroidetes	c__Chitinophagia	o__Chitinophagales	f__Chitinophagaceae	g__Haoranjiania	Unclass_Haoranjiania
sk__Bacteria	k__Bacteria	p__Candidatus_Wolfebacteria	Unclass_Candidatus_Wolfebacteria	Unclass_Candidatus_Wolfebacteria	Unclass_Candidatus_Wolfebacteria	Unclass_Candidatus_Wolfebacteria	Unclass_Candidatus_Wolfebacteria
sk__Bacteria	k__Bacteria	p__Cyanobacteria	Unclass_Cyanobacteria	o__Pleurocapsales	Unclass_Pleurocapsales	Unclass_Pleurocapsales	Unclass_Pleurocapsales
sk__Bacteria	k__Bacteria	p__Cyanobacteria	Unclass_Cyanobacteria	o__Pleurocapsales	f__Xenococcaceae	Unclass_Xenococcaceae	Unclass_Xenococcaceae
sk__Bacteria	k__Bacteria	p__Firmicutes	c__Bacilli	o__Lactobacillales	f__Carnobacteriaceae	g__Marinilactibacillus	s__Marinilactibacillus_sp._G13.51
sk__Bacteria	k__Bacteria	p__Firmicutes	c__Clostridia	o__Clostridiales	f__Clostridiaceae	g__Hathewaya	Unclass_Hathewaya
sk__Bacteria	k__Bacteria	p__Firmicutes	c__Clostridia	o__Clostridiales	f__Clostridiales_Family_XIII._Incertae_Sedis	Unclass_Clostridiales_Family_XIII._Incertae_Sedis	s__[Eubacterium]_saphenum
sk__Bacteria	k__Bacteria	p__Firmicutes	c__Clostridia	o__Clostridiales	f__Lachnospiraceae	g__Blautia	s__Blautia_stercoris
sk__Bacteria	k__Bacteria	p__Firmicutes	c__Clostridia	o__Clostridiales	f__Ruminococcaceae	g__Ruminococcus	s__Ruminococcus_sp._Marseille-P328
sk__Bacteria	k__Bacteria	p__Firmicutes	c__Negativicutes	o__Veillonellales	f__Veillonellaceae	g__Megasphaera	s__Megasphaera_micronuciformis
sk__Bacteria	k__Bacteria	p__Gemmatimonadetes	c__Longimicrobia	o__Longimicrobiales	f__Longimicrobiaceae	Unclass_Longimicrobiaceae	Unclass_Longimicrobiaceae
sk__Bacteria	k__Bacteria	p__Proteobacteria	c__Alphaproteobacteria	o__Rhodospirillales	f__Acetobacteraceae	g__Acidiphilium	Unclass_Acidiphilium
sk__Bacteria	k__Bacteria	p__Proteobacteria	c__Betaproteobacteria	o__Nitrosomonadales	f__Gallionellaceae	g__Sulfurirhabdus	Unclass_Sulfurirhabdus
sk__Bacteria	k__Bacteria	p__Proteobacteria	c__Deltaproteobacteria	o__Syntrophobacterales	f__Syntrophaceae	Unclass_Syntrophaceae	Unclass_Syntrophaceae
sk__Bacteria	k__Bacteria	p__Proteobacteria	c__Gammaproteobacteria	o__Enterobacterales	f__Enterobacteriaceae	g__Candidatus_Regiella	Unclass_Candidatus_Regiella
sk__Bacteria	k__Bacteria	p__Proteobacteria	c__Gammaproteobacteria	o__Enterobacterales	f__Thorselliaceae	Unclass_Thorselliaceae	Unclass_Thorselliaceae
sk__Bacteria	k__Bacteria	p__Proteobacteria	c__Gammaproteobacteria	o__Thiotrichales	f__Piscirickettsiaceae	Unclass_Piscirickettsiaceae	Unclass_Piscirickettsiaceae
sk__Bacteria	k__Bacteria	p__Proteobacteria	c__Gammaproteobacteria	o__Vibrionales	f__Vibrionaceae	g__Vibrio	s__Vibrio_parahaemolyticus
sk__Bacteria	k__Bacteria	p__Proteobacteria	c__Gammaproteobacteria	o__Vibrionales	f__Vibrionaceae	g__Vibrio	s__Vibrio_sp._NJ-2
sk__Bacteria	k__Bacteria	p__Verrucomicrobia	c__Methylacidiphilae	o__Methylacidiphilales	f__Methylacidiphilaceae	Unclass_Methylacidiphilaceae	Unclass_Methylacidiphilaceae
sk__Bacteria	k__Bacteria	Unclass_Bacteria	Unclass_Bacteria	Unclass_Bacteria	Unclass_Bacteria	Unclass_Bacteria	s__bacterium_P2-20-7
sk__Bacteria	k__Bacteria	p__Actinobacteria	c__Actinobacteria	o__Corynebacteriales	f__Corynebacteriaceae	g__Corynebacterium	s__Corynebacterium_simulans
sk__Bacteria	k__Bacteria	p__Actinobacteria	c__Actinobacteria	o__Micrococcales	f__Beutenbergiaceae	Unclass_Beutenbergiaceae	Unclass_Beutenbergiaceae
sk__Bacteria	k__Bacteria	p__Actinobacteria	c__Actinobacteria	o__Micrococcales	f__Micrococcaceae	g__Micrococcus	s__Micrococcus_terreus
sk__Bacteria	k__Bacteria	p__Actinobacteria	c__Actinobacteria	o__Micrococcales	f__Micrococcaceae	g__Rothia	s__Rothia_sp._HMSC065C03
sk__Bacteria	k__Bacteria	p__Bacteroidetes	c__Bacteroidia	o__Bacteroidales	Unclass_Bacteroidales	Unclass_Bacteroidales	s__Bacteroidales_genomosp._P1
sk__Bacteria	k__Bacteria	p__Candidatus_Lindowbacteria	Unclass_Candidatus_Lindowbacteria	Unclass_Candidatus_Lindowbacteria	Unclass_Candidatus_Lindowbacteria	Unclass_Candidatus_Lindowbacteria	Unclass_Candidatus_Lindowbacteria
sk__Bacteria	k__Bacteria	p__Candidatus_Pacebacteria	Unclass_Candidatus_Pacebacteria	Unclass_Candidatus_Pacebacteria	Unclass_Candidatus_Pacebacteria	Unclass_Candidatus_Pacebacteria	Unclass_Candidatus_Pacebacteria
sk__Bacteria	k__Bacteria	p__Cyanobacteria	Unclass_Cyanobacteria	o__Chroococcales	Unclass_Chroococcales	Unclass_Chroococcales	Unclass_Chroococcales
sk__Bacteria	k__Bacteria	p__Cyanobacteria	Unclass_Cyanobacteria	o__Chroococcales	f__Cyanobacteriaceae	Unclass_Cyanobacteriaceae	Unclass_Cyanobacteriaceae
sk__Bacteria	k__Bacteria	p__Firmicutes	c__Bacilli	o__Bacillales	f__Paenibacillaceae	g__Ammoniibacillus	Unclass_Ammoniibacillus
sk__Bacteria	k__Bacteria	p__Firmicutes	c__Bacilli	o__Bacillales	f__Staphylococcaceae	g__Macrococcus	Unclass_Macrococcus
sk__Bacteria	k__Bacteria	p__Firmicutes	c__Bacilli	o__Bacillales	f__Staphylococcaceae	g__Staphylococcus	s__Staphylococcus_haemolyticus
sk__Bacteria	k__Bacteria	p__Firmicutes	c__Bacilli	o__Bacillales	f__Staphylococcaceae	g__Staphylococcus	s__Staphylococcus_simulans
sk__Bacteria	k__Bacteria	p__Firmicutes	c__Bacilli	o__Bacillales	f__Thermoactinomycetaceae	g__Thermoactinomyces	Unclass_Thermoactinomyces
sk__Bacteria	k__Bacteria	p__Firmicutes	c__Bacilli	o__Lactobacillales	f__Carnobacteriaceae	g__Granulicatella	s__Granulicatella_sp._canine_oral_taxon_095
sk__Bacteria	k__Bacteria	p__Firmicutes	c__Bacilli	o__Lactobacillales	f__Carnobacteriaceae	g__Jeotgalibaca	Unclass_Jeotgalibaca
sk__Bacteria	k__Bacteria	p__Firmicutes	c__Bacilli	o__Lactobacillales	f__Lactobacillaceae	g__Lactobacillus	s__Lactobacillus_satsumensis
sk__Bacteria	k__Bacteria	p__Firmicutes	c__Bacilli	o__Lactobacillales	f__Streptococcaceae	g__Streptococcus	s__Streptococcus_gordonii
sk__Bacteria	k__Bacteria	p__Firmicutes	c__Bacilli	o__Lactobacillales	f__Streptococcaceae	g__Streptococcus	s__Streptococcus_mitis
sk__Bacteria	k__Bacteria	p__Firmicutes	c__Clostridia	o__Clostridiales	f__Eubacteriaceae	g__Eubacterium	s__Eubacterium_sp._oral_clone_EI074
sk__Bacteria	k__Bacteria	p__Firmicutes	c__Clostridia	o__Clostridiales	f__Lachnospiraceae	g__Johnsonella	s__Johnsonella_ignava
sk__Bacteria	k__Bacteria	p__Firmicutes	c__Clostridia	o__Clostridiales	f__Peptostreptococcaceae	g__Filifactor	s__Filifactor_alocis
sk__Bacteria	k__Bacteria	p__Firmicutes	c__Clostridia	o__Thermoanaerobacterales	f__Thermoanaerobacterales_Family_IV._Incertae_Sedis	Unclass_Thermoanaerobacterales_Family_IV._Incertae_Sedis	Unclass_Thermoanaerobacterales_Family_IV._Incertae_Sedis
sk__Bacteria	k__Bacteria	p__Fusobacteria	c__Fusobacteriia	o__Fusobacteriales	f__Leptotrichiaceae	g__Leptotrichia	s__Leptotrichia_buccalis
sk__Bacteria	k__Bacteria	p__Gemmatimonadetes	c__Longimicrobia	o__Longimicrobiales	Unclass_Longimicrobiales	Unclass_Longimicrobiales	Unclass_Longimicrobiales
sk__Bacteria	k__Bacteria	p__Planctomycetes	c__Phycisphaerae	Unclass_Phycisphaerae	Unclass_Phycisphaerae	Unclass_Phycisphaerae	Unclass_Phycisphaerae
sk__Bacteria	k__Bacteria	p__Proteobacteria	c__Alphaproteobacteria	o__Caulobacterales	f__Caulobacteraceae	g__Phenylobacterium	Unclass_Phenylobacterium
sk__Bacteria	k__Bacteria	p__Proteobacteria	c__Alphaproteobacteria	o__Rhizobiales	f__Phyllobacteriaceae	Unclass_Phyllobacteriaceae	Unclass_Phyllobacteriaceae
sk__Bacteria	k__Bacteria	p__Proteobacteria	c__Betaproteobacteria	Unclass_Betaproteobacteria	Unclass_Betaproteobacteria	Unclass_Betaproteobacteria	s__beta_proteobacterium_WX163
sk__Bacteria	k__Bacteria	p__Proteobacteria	c__Betaproteobacteria	o__Burkholderiales	f__Burkholderiaceae	g__Cupriavidus	Unclass_Cupriavidus
sk__Bacteria	k__Bacteria	p__Proteobacteria	c__Betaproteobacteria	o__Nitrosomonadales	f__Sterolibacteriaceae	g__Methyloversatilis	Unclass_Methyloversatilis
sk__Bacteria	k__Bacteria	p__Proteobacteria	c__Deltaproteobacteria	o__Desulfuromonadales	f__Desulfuromonadaceae	g__Desulfuromonas	Unclass_Desulfuromonas
sk__Bacteria	k__Bacteria	p__Proteobacteria	c__Gammaproteobacteria	o__Alteromonadales	f__Ferrimonadaceae	g__Ferrimonas	Unclass_Ferrimonas
sk__Bacteria	k__Bacteria	p__Proteobacteria	c__Gammaproteobacteria	o__Enterobacterales	f__Erwiniaceae	g__Pantoea	s__Pantoea_sp._R21
sk__Bacteria	k__Bacteria	p__Proteobacteria	c__Gammaproteobacteria	o__Enterobacterales	f__Morganellaceae	g__Proteus	s__Proteus_mirabilis
sk__Bacteria	k__Bacteria	p__Proteobacteria	c__Gammaproteobacteria	o__Xanthomonadales	f__Xanthomonadaceae	g__Vulcaniibacterium	Unclass_Vulcaniibacterium
sk__Eukaryota	k__Eukaryota	Unclass_Eukaryota	c__Chrysophyceae	o__Chromulinales	f__Paraphysomonadaceae	g__Paraphysomonas	Unclass_Paraphysomonas
sk__Eukaryota	k__Eukaryota	Unclass_Eukaryota	c__Spirotrichea	o__Tintinnida	f__Tintinnidae	Unclass_Tintinnidae	Unclass_Tintinnidae
